# Supplementary material for: CRISPR screens in cancer spheroids identify 3D growth-specific vulnerabilities
Source: Springer Nature journal article supplement (doi:10.1038/s41586-020-2099-x), 2020-03-11
Supplement: MOESM3 [file 41586_2020_2099_MOESM3_ESM.xlsx]

## Sheet: Descriptions for column heads
	Column heads	Descriptions for column heads
	Symbol	Gene symbol
	EnsemblID	Gene Ensemble id
	GeneID	Gene id
	GeneInfo	Gene information
	Localization	Gene localization
	Process	Gene process
	Function	Gene function
	#Element	# of sgRNAs detected in two replicates (max: 20)
	Med Phenotype (pZ)	Gene effects
	Tscore	Gene phenotype score (T-score)
	MWU P-val	Two-sided Mann-Whitney U test p value
	MWU Q-val	Adjusted FDR from Mann-Whitney U test p value using Benjamini-Hochberg procedure
	N for statistical tests	Statistical test were performed between gene-targeting sgRNAs (n = "#Element") and all control sgRNAs (n = 13,500) (see Methods)

## Sheet: H23 2D Genome-wide data
Symbol	EnsemblID	GeneID	GeneInfo	Localization	Process	Function	#Element	Med Phenotype (pZ)	Tscore	MWU P-val	MWU Q-val
NDUFB10	ENSG00000140990	4716	NADH:ubiquinone oxidoreductase subunit B10	mitochondrial inner membrane|mitochondrial respiratory chain complex I|mitochondrial respiratory chain complex I|extracellular vesicular exosome|	mitochondrial electron transport, NADH to ubiquinone|respiratory electron transport chain|cellular metabolic process|small molecule metabolic process|	protein binding|NADH dehydrogenase (ubiquinone) activity|	18	-6.52057	-10.0115	3.23314e-13	1.8702e-10
PRDX1	ENSG00000117450	5052	peroxiredoxin 1	extracellular space|nucleus|nuclear euchromatin|nucleolus|cytoplasm|mitochondrial matrix|peroxisomal matrix|cytosol|melanosome|extracellular vesicular exosome|	skeletal system development|retina homeostasis|cell proliferation|removal of superoxide radicals|regulation of stress-activated MAPK cascade|erythrocyte homeostasis|natural killer cell mediated cytotoxicity|regulation of NF-kappaB import into nucleus|hydrogen peroxide catabolic process|oxidation-reduction process|	peroxidase activity|protein binding|thioredoxin peroxidase activity|heme binding|protein homodimerization activity|poly(A) RNA binding|	20	-5.77784	-9.84666	1.45204e-14	1.02079e-10
WDR83	ENSG00000123154	84292	WD repeat domain 83	spliceosomal complex|cytoplasm|catalytic step 2 spliceosome|	RNA splicing, via transesterification reactions|mRNA splicing, via spliceosome|mRNA splicing, via spliceosome|	protein binding|	14	-3.44375	-9.21859	2.24248e-09	9.19839e-08
DHFR	ENSG00000228716	1719	dihydrofolate reductase				20	-4.37369	-9.06143	7.05482e-14	1.06339e-10
HSD17B10	ENSG00000072506	3028	hydroxysteroid 17-beta dehydrogenase 10	cytoplasm|mitochondrion|mitochondrial inner membrane|mitochondrial matrix|endoplasmic reticulum|plasma membrane|	lipid metabolic process|tRNA processing|branched-chain amino acid catabolic process|cellular nitrogen compound metabolic process|small molecule metabolic process|oxidation-reduction process|	3-hydroxyacyl-CoA dehydrogenase activity|protein binding|cholate 7-alpha-dehydrogenase activity|testosterone dehydrogenase [NAD(P)] activity|poly(A) RNA binding|3-hydroxy-2-methylbutyryl-CoA dehydrogenase activity|	20	-5.98102	-8.92371	2.13103e-14	1.02079e-10
MRPS27	ENSG00000113048	23107	mitochondrial ribosomal protein S27	mitochondrion|ribosome|		protein binding|	18	-4.99356	-8.87158	1.81097e-12	4.88718e-10
GPI	ENSG00000105220	2821	glucose-6-phosphate isomerase	extracellular space|nucleus|cytoplasm|cytosol|plasma membrane|membrane|neuron projection|extracellular vesicular exosome|	angiogenesis|carbohydrate metabolic process|glucose metabolic process|gluconeogenesis|glycolytic process|glycolytic process|humoral immune response|hemostasis|learning or memory|methylglyoxal biosynthetic process|negative regulation of cysteine-type endopeptidase activity involved in apoptotic process|negative regulation of neuron apoptotic process|small molecule metabolic process|aldehyde catabo…	glucose-6-phosphate isomerase activity|cytokine activity|growth factor activity|intramolecular transferase activity|monosaccharide binding|	20	-3.8798	-8.73813	2.02791e-12	5.19196e-10
AC011997.1	ENSG00000222017						10	-3.05451	-8.58872	8.57039e-08	1.7978e-06
PHF5A	ENSG00000100410	84844	PHD finger protein 5A	nucleoplasm|U2 snRNP|U12-type spliceosomal complex|nuclear matrix|nuclear speck|	mRNA splicing, via spliceosome|mRNA splicing, via spliceosome|transcription, DNA-templated|RNA splicing|gene expression|positive regulation of transcription, DNA-templated|	DNA binding|sequence-specific DNA binding transcription factor activity|poly(A) RNA binding|	18	-3.17748	-8.50409	5.35538e-11	5.02098e-09
ATP2C1	ENSG00000017260	27032	ATPase secretory pathway Ca2+ transporting 1	Golgi membrane|Golgi membrane|Golgi apparatus|trans-Golgi network|membrane|integral component of membrane|	calcium ion transport|calcium ion transport|manganese ion transport|cellular calcium ion homeostasis|cellular calcium ion homeostasis|signal transduction|metabolic process|epidermis development|calcium-dependent cell-cell adhesion|cellular manganese ion homeostasis|actin cytoskeleton reorganization|Golgi calcium ion homeostasis|Golgi calcium ion transport|ion transmembrane transport|positive regu…	signal transducer activity|calcium-transporting ATPase activity|calcium-transporting ATPase activity|calcium ion binding|ATP binding|ATP binding|manganese-transporting ATPase activity|manganese ion binding|metal ion binding|	20	-2.74746	-8.50009	4.46418e-13	2.12261e-10
SLC25A1	ENSG00000100075	6576	solute carrier family 25 member 1	nucleus|mitochondrial inner membrane|integral component of membrane|extracellular vesicular exosome|	carbohydrate metabolic process|glucose metabolic process|gluconeogenesis|citrate transport|triglyceride biosynthetic process|long-chain fatty-acyl-CoA biosynthetic process|cellular lipid metabolic process|small molecule metabolic process|transmembrane transport|	citrate transmembrane transporter activity|	20	-4.52051	-8.44937	3.17581e-08	7.70606e-07
DPH3	ENSG00000154813	285381	diphthamide biosynthesis 3	nucleus|cytoplasm|	peptidyl-diphthamide biosynthetic process from peptidyl-histidine|peptidyl-diphthamide biosynthetic process from peptidyl-histidine|negative regulation of protein secretion|positive regulation of binding|	protein binding|metal ion binding|	14	-8.02586	-8.40655	3.79711e-09	1.39181e-07
EIF3I	ENSG00000084623	8668	eukaryotic translation initiation factor 3 subunit I	cytosol|eukaryotic translation initiation factor 3 complex|eukaryotic 43S preinitiation complex|eukaryotic 48S preinitiation complex|extracellular vesicular exosome|	formation of translation preinitiation complex|translation|translational initiation|translational initiation|translational initiation|regulation of translational initiation|gene expression|cellular protein metabolic process|	translation initiation factor activity|translation initiation factor activity|protein binding|	18	-4.52827	-8.36782	1.10834e-11	1.63952e-09
METAP1	ENSG00000164024	23173	methionyl aminopeptidase 1	cytoplasm|cytosol|cytosolic ribosome|	regulation of translation|proteolysis|phototransduction, visible light|rhodopsin mediated signaling pathway|peptidyl-methionine modification|regulation of rhodopsin mediated signaling pathway|N-terminal protein amino acid modification|protein initiator methionine removal|	aminopeptidase activity|metalloexopeptidase activity|metal ion binding|metalloaminopeptidase activity|	18	-4.86727	-8.34693	3.84241e-13	2.07386e-10
PRKDC	ENSG00000253729	5591	protein kinase, DNA-activated, catalytic polypeptide	nucleus|nucleoplasm|transcription factor complex|nucleolus|cytosol|DNA-dependent protein kinase-DNA ligase 4 complex|membrane|nonhomologous end joining complex|	telomere maintenance|somitogenesis|negative regulation of protein phosphorylation|B cell lineage commitment|pro-B cell differentiation|T cell lineage commitment|DNA repair|double-strand break repair|double-strand break repair via nonhomologous end joining|cellular protein modification process|brain development|heart development|intrinsic apoptotic signaling pathway in response to DNA damage|respo…	DNA binding|protein kinase activity|protein serine/threonine kinase activity|DNA-dependent protein kinase activity|protein binding|ATP binding|transcription factor binding|enzyme binding|poly(A) RNA binding|	20	-5.72569	-8.19421	2.14548e-11	2.57726e-09
OR4F17	ENSG00000176695	81099	olfactory receptor family 4 subfamily F member 17	plasma membrane|integral component of membrane|	G-protein coupled receptor signaling pathway|detection of chemical stimulus involved in sensory perception of smell|	G-protein coupled receptor activity|olfactory receptor activity|	20	-3.88513	-8.12299	2.85795e-12	6.2718e-10
TKT	ENSG00000163931	7086	transketolase	nucleus|peroxisome|cytosol|extracellular vesicular exosome|	carbohydrate metabolic process|xylulose biosynthetic process|pentose-phosphate shunt|energy reserve metabolic process|pentose-phosphate shunt, non-oxidative branch|regulation of growth|small molecule metabolic process|glyceraldehyde-3-phosphate biosynthetic process|	transketolase activity|transketolase activity|protein homodimerization activity|metal ion binding|cofactor binding|	20	-4.51314	-8.04169	3.4555e-12	7.11406e-10
DNM1L	ENSG00000087470	10059	dynamin 1 like	cytoplasm|mitochondrion|mitochondrial outer membrane|mitochondrial outer membrane|peroxisome|peroxisome|Golgi apparatus|cytosol|cytosol|microtubule|coated pit|membrane|cell junction|synaptic vesicle membrane|intracellular membrane-bounded organelle|protein complex|perinuclear region of cytoplasm|	mitochondrial fission|mitochondrial fission|release of cytochrome c from mitochondria|dynamin polymerization involved in mitochondrial fission|GTP catabolic process|endocytosis|apoptotic process|cellular component disassembly involved in execution phase of apoptosis|regulation of mitochondrion organization|peroxisome fission|peroxisome fission|regulation of protein oligomerization|positive regula…	GTPase activity|protein binding|GTP binding|lipid binding|ubiquitin protein ligase binding|identical protein binding|protein homodimerization activity|	20	-5.17285	-8.02583	3.06698e-14	1.02079e-10
PPA2	ENSG00000138777	27068	pyrophosphatase (inorganic) 2	mitochondrial matrix|extracellular vesicular exosome|	tRNA aminoacylation for protein translation|gene expression|dephosphorylation|diphosphate metabolic process|	magnesium ion binding|inorganic diphosphatase activity|protein serine/threonine phosphatase activity|	20	-4.213	-7.98093	8.13674e-10	4.07245e-08
TARDBP	ENSG00000120948	23435	TAR DNA binding protein	nucleus|	regulation of transcription, DNA-templated|transcription from RNA polymerase II promoter|mRNA processing|cell death|RNA splicing|negative regulation by host of viral transcription|3'-UTR-mediated mRNA stabilization|	nucleotide binding|double-stranded DNA binding|sequence-specific DNA binding transcription factor activity|RNA binding|mRNA 3'-UTR binding|protein binding|identical protein binding|poly(A) RNA binding|	20	-4.23725	-7.88163	8.26949e-13	3.19222e-10
CTPS1	ENSG00000171793	1503	CTP synthase 1	cellular_component|cytosol|membrane|	nucleobase-containing compound metabolic process|CTP biosynthetic process|glutamine metabolic process|nucleobase-containing small molecule interconversion|response to drug|'de novo' CTP biosynthetic process|small molecule metabolic process|nucleobase-containing small molecule metabolic process|	CTP synthase activity|CTP synthase activity|CTP synthase activity|ATP binding|	20	-6.25929	-7.86658	1.19672e-09	5.57075e-08
ATP5SL	ENSG00000105341	55101	ATP5S like	mitochondrion|			20	-3.32622	-7.72518	7.45494e-14	1.06339e-10
SP1	ENSG00000185591	6667	Sp1 transcription factor	nucleus|nucleus|nucleoplasm|cytoplasm|protein-DNA complex|	ossification|trophectodermal cell differentiation|liver development|embryonic placenta development|transcription, DNA-templated|regulation of transcription, DNA-templated|transcription initiation from RNA polymerase II promoter|transforming growth factor beta receptor signaling pathway|gene expression|viral process|megakaryocyte differentiation|lung development|enucleate erythrocyte differentiati…	RNA polymerase II core promoter proximal region sequence-specific DNA binding|RNA polymerase II core promoter sequence-specific DNA binding|core promoter sequence-specific DNA binding|RNA polymerase II core promoter proximal region sequence-specific DNA binding transcription factor activity involved in positive regulation of transcription|RNA polymerase II repressing transcription factor binding|…	20	-2.96585	-7.72372	1.0532e-11	1.56959e-09
MRPL18	ENSG00000112110	29074	mitochondrial ribosomal protein L18	extracellular space|mitochondrion|mitochondrial ribosome|	translation|rRNA import into mitochondrion|	structural constituent of ribosome|5S rRNA binding|	18	-4.43116	-7.64899	7.71125e-13	3.14273e-10
RPP21	ENSG00000241370	79897	ribonuclease P/MRP subunit p21	nucleolus|	tRNA processing|response to drug|RNA phosphodiester bond hydrolysis, endonucleolytic|	ribonuclease P activity|metal ion binding|	20	-6.80665	-7.60855	3.64461e-14	1.03976e-10
TYMS	ENSG00000176890	7298	thymidylate synthetase	nucleus|nucleoplasm|nucleolus|cytoplasm|mitochondrion|mitochondrial inner membrane|mitochondrial matrix|cytosol|	G1/S transition of mitotic cell cycle|regulation of transcription involved in G1/S transition of mitotic cell cycle|mitotic cell cycle|polysaccharide metabolic process|nucleobase-containing compound metabolic process|pyrimidine nucleobase metabolic process|dTMP biosynthetic process|dTTP biosynthetic process|DNA replication|DNA repair|aging|circadian rhythm|deoxyribonucleoside monophosphate biosyn…	nucleotide binding|mRNA binding|thymidylate synthase activity|folic acid binding|drug binding|protein homodimerization activity|cofactor binding|	20	-5.39827	-7.58152	9.90528e-12	1.50999e-09
DOHH	ENSG00000129932	83475	deoxyhypusine hydroxylase	cellular_component|cytosol|	peptidyl-lysine modification to peptidyl-hypusine|peptidyl-lysine modification to peptidyl-hypusine|post-translational protein modification|cellular protein metabolic process|oxidation-reduction process|	protein binding|deoxyhypusine monooxygenase activity|deoxyhypusine monooxygenase activity|metal ion binding|	20	-4.92011	-7.54943	7.96022e-13	3.17931e-10
MNT	ENSG00000070444	4335	MAX network transcriptional repressor	nucleus|	negative regulation of transcription from RNA polymerase II promoter|transcription from RNA polymerase II promoter|multicellular organismal development|cell aging|negative regulation of cell proliferation|regulation of cell cycle|negative regulation of apoptotic signaling pathway|	RNA polymerase II regulatory region sequence-specific DNA binding|RNA polymerase II transcription regulatory region sequence-specific DNA binding transcription factor activity involved in negative regulation of transcription|chromatin binding|sequence-specific DNA binding transcription factor activity|transcription coactivator activity|transcription corepressor activity|protein dimerization activ…	20	-2.56216	-7.5479	1.09015e-12	3.64743e-10
PFN1	ENSG00000108518	5216	profilin 1	nucleus|cytosol|cytoskeleton|membrane|neuron projection|synapse|extracellular vesicular exosome|blood microparticle|	neural tube closure|platelet degranulation|blood coagulation|cell death|positive regulation of epithelial cell migration|actin cytoskeleton organization|platelet activation|negative regulation of actin filament polymerization|positive regulation of actin filament polymerization|negative regulation of actin filament bundle assembly|positive regulation of ATPase activity|positive regulation of tran…	adenyl-nucleotide exchange factor activity|actin binding|receptor binding|protein binding|phosphatidylinositol-4,5-bisphosphate binding|Rho GTPase binding|poly(A) RNA binding|proline-rich region binding|	20	-3.25328	-7.5365	1.8019e-13	1.43936e-10
ENO1	ENSG00000074800	2023	enolase 1	phosphopyruvate hydratase complex|extracellular space|nucleus|nucleus|cytoplasm|cytosol|plasma membrane|membrane|M band|extracellular vesicular exosome|	negative regulation of transcription from RNA polymerase II promoter|carbohydrate metabolic process|glucose metabolic process|gluconeogenesis|glycolytic process|glycolytic process|transcription, DNA-templated|response to virus|negative regulation of cell growth|small molecule metabolic process|negative regulation of transcription, DNA-templated|	magnesium ion binding|DNA binding|sequence-specific DNA binding transcription factor activity|transcription corepressor activity|phosphopyruvate hydratase activity|protein binding|poly(A) RNA binding|	20	-4.49907	-7.53543	1.89195e-14	1.02079e-10
PCBP2	ENSG00000197111	5094	poly(rC) binding protein 2	nucleus|nucleoplasm|cytoplasm|cytosol|membrane|ribonucleoprotein complex|extracellular vesicular exosome|	mRNA splicing, via spliceosome|RNA splicing|gene expression|mRNA metabolic process|negative regulation of type I interferon production|proteasome-mediated ubiquitin-dependent protein catabolic process|innate immune response|negative regulation of defense response to virus|defense response to virus|	DNA binding|RNA binding|protein binding|enzyme binding|ubiquitin protein ligase binding|poly(A) RNA binding|	20	-4.95988	-7.48886	6.52347e-12	1.14275e-09
ACTG1	ENSG00000184009	71	actin gamma 1	extracellular space|nucleus|cytosol|cytoskeleton|membrane|myofibril|filamentous actin|extracellular vesicular exosome|blood microparticle|	retina homeostasis|cellular component movement|axon guidance|cell junction assembly|adherens junction organization|Fc-gamma receptor signaling pathway involved in phagocytosis|innate immune response|sarcomere organization|cell-cell junction organization|membrane organization|	structural constituent of cytoskeleton|protein binding|ATP binding|identical protein binding|	20	-2.8556	-7.47659	1.95577e-13	1.50219e-10
PPP4C	ENSG00000149923	5531	protein phosphatase 4 catalytic subunit	nucleus|cytoplasm|microtubule organizing center|plasma membrane|protein phosphatase 4 complex|	regulation of double-strand break repair via homologous recombination|dephosphorylation|dephosphorylation|dephosphorylation|NIK/NF-kappaB signaling|	NF-kappaB-inducing kinase activity|protein serine/threonine phosphatase activity|protein serine/threonine phosphatase activity|protein binding|metal ion binding|	18	-3.56078	-7.41036	5.18747e-11	4.90966e-09
NDUFA1	ENSG00000125356	4694	NADH:ubiquinone oxidoreductase subunit A1	mitochondrion|mitochondrial inner membrane|mitochondrial respiratory chain complex I|mitochondrial respiratory chain complex I|integral component of membrane|mitochondrial membrane|	mitochondrial electron transport, NADH to ubiquinone|respiratory electron transport chain|cellular metabolic process|small molecule metabolic process|	NADH dehydrogenase (ubiquinone) activity|	20	-5.35586	-7.40666	2.58135e-14	1.02079e-10
TMEM261	ENSG00000137038	90871	transmembrane protein 261	integral component of membrane|			20	-4.83021	-7.35852	1.5455e-12	4.34699e-10
RNASEH2C	ENSG00000172922	84153	ribonuclease H2 subunit C	nucleus|ribonuclease H2 complex|	RNA catabolic process|		18	-4.72879	-7.34788	8.07182e-11	6.94803e-09
ACTR2	ENSG00000138071	10097	ARP2 actin related protein 2 homolog	cytosol|Arp2/3 protein complex|Arp2/3 protein complex|actin cytoskeleton|membrane|actin cap|cell projection|extracellular vesicular exosome|	cellular component movement|establishment or maintenance of cell polarity|asymmetric cell division|cytoplasmic transport|actin cytoskeleton organization|meiotic cytokinesis|Fc-gamma receptor signaling pathway involved in phagocytosis|innate immune response|spindle localization|	actin binding|ATP binding|	20	-3.91168	-7.32997	6.42493e-14	1.06339e-10
GTPBP6	ENSG00000178605	8225	GTP binding protein 6 (putative)			GTP binding|metal ion binding|	18	-5.2568	-7.31791	4.28477e-11	4.21511e-09
POLR2L	ENSG00000177700	5441	RNA polymerase II subunit L	nucleus|nucleoplasm|DNA-directed RNA polymerase II, core complex|DNA-directed RNA polymerase III complex|DNA-directed RNA polymerase I complex|cytosol|	mRNA splicing, via spliceosome|DNA repair|transcription-coupled nucleotide-excision repair|nucleotide-excision repair|regulation of transcription from RNA polymerase I promoter|transcription from RNA polymerase I promoter|transcription from RNA polymerase II promoter|transcription from RNA polymerase II promoter|transcription initiation from RNA polymerase II promoter|transcription elongation fro…	RNA polymerase I activity|RNA polymerase II activity|RNA polymerase III activity|DNA binding|DNA-directed RNA polymerase activity|zinc ion binding|	14	-4.09073	-7.30579	3.24371e-10	1.94525e-08
TEN1	ENSG00000257949	100134934	TEN1, CST complex subunit	nuclear chromosome, telomeric region|nucleus|Stn1-Ten1 complex|		single-stranded DNA binding|protein binding|	18	-2.7298	-7.29659	1.93115e-12	5.09867e-10
FAM58A	ENSG00000147382	92002	family with sequence similarity 58 member A		regulation of cyclin-dependent protein serine/threonine kinase activity|regulation of transcription, DNA-templated|	protein binding|protein kinase binding|	20	-3.70444	-7.279	9.23176e-11	7.68894e-09
IER2	ENSG00000160888	9592	immediate early response 2	cytoplasm|			20	-2.52829	-7.23505	3.29773e-12	6.85997e-10
N6AMT1	ENSG00000156239	29104	N-6 adenine-specific DNA methyltransferase 1 (putative)	protein complex|	protein methylation|protein methylation|positive regulation of cell growth|	nucleic acid binding|protein binding|protein methyltransferase activity|	20	-5.01645	-7.21992	3.33345e-11	3.46713e-09
BSG	ENSG00000172270	682	basigin (Ok blood group)	Golgi membrane|acrosomal membrane|mitochondrion|plasma membrane|integral component of plasma membrane|membrane|sarcolemma|melanosome|membrane raft|extracellular vesicular exosome|	pyruvate metabolic process|cell surface receptor signaling pathway|embryo implantation|blood coagulation|extracellular matrix disassembly|extracellular matrix organization|odontogenesis of dentin-containing tooth|response to peptide hormone|cellular metabolic process|small molecule metabolic process|response to mercury ion|decidualization|leukocyte migration|response to cAMP|protein targeting to …	protein binding|mannose binding|	20	-2.10538	-7.19031	4.31626e-12	7.98109e-10
NDUFAF3	ENSG00000178057	25915	NADH:ubiquinone oxidoreductase complex assembly factor 3	nucleus|mitochondrial inner membrane|	mitochondrial respiratory chain complex I assembly|	protein binding|	20	-5.7713	-7.18468	1.16268e-11	1.68214e-09
UROS	ENSG00000188690	7390	uroporphyrinogen III synthase	mitochondrion|cytosol|cytosol|	porphyrin-containing compound metabolic process|uroporphyrinogen III biosynthetic process|protoporphyrinogen IX biosynthetic process|heme biosynthetic process|heme biosynthetic process|heme biosynthetic process|small molecule metabolic process|response to antibiotic|cellular response to arsenic-containing substance|cellular response to amine stimulus|	uroporphyrinogen-III synthase activity|cofactor binding|	20	-3.77497	-7.17837	7.93494e-12	1.2867e-09
MRPS34	ENSG00000074071	65993	mitochondrial ribosomal protein S34	mitochondrion|ribosome|			18	-3.76034	-7.15569	9.27423e-12	1.44693e-09
NSUN4	ENSG00000117481	387338	NOP2/Sun RNA methyltransferase family member 4	mitochondrial large ribosomal subunit|	rRNA processing|methylation|	RNA binding|protein binding|methyltransferase activity|	20	-5.19778	-7.14951	1.86113e-11	2.32292e-09
CUL5	ENSG00000166266	8065	cullin 5	nucleus|cytosol|plasma membrane|Cul5-RING ubiquitin ligase complex|	G1/S transition of mitotic cell cycle|ubiquitin-dependent protein catabolic process|response to osmotic stress|cell cycle arrest|cell proliferation|negative regulation of cell proliferation|viral process|protein ubiquitination|cytosolic calcium ion homeostasis|calcium ion transmembrane transport|intrinsic apoptotic signaling pathway|	receptor activity|calcium channel activity|protein binding|ubiquitin protein ligase binding|	20	-2.66305	-7.14485	1.41299e-11	1.85641e-09
CS	ENSG00000062485	1431	citrate synthase	nucleus|mitochondrion|mitochondrial matrix|mitochondrial matrix|extracellular vesicular exosome|	carbohydrate metabolic process|tricarboxylic acid cycle|tricarboxylic acid cycle|cellular metabolic process|cellular carbohydrate metabolic process|small molecule metabolic process|	citrate (Si)-synthase activity|citrate (Si)-synthase activity|poly(A) RNA binding|	20	-3.05214	-7.13757	1.93994e-09	8.13877e-08
CLPP	ENSG00000125656	8192	caseinolytic mitochondrial matrix peptidase proteolytic subunit	mitochondrion|mitochondrial matrix|endopeptidase Clp complex|	protein homooligomerization|proteolysis involved in cellular protein catabolic process|	serine-type endopeptidase activity|protein binding|peptidase activity|identical protein binding|	20	-4.36074	-7.12807	4.93532e-14	1.06339e-10
PTPMT1	ENSG00000110536	114971	protein tyrosine phosphatase, mitochondrial 1	nucleus|mitochondrion|mitochondrial inner membrane|	protein dephosphorylation|phospholipid metabolic process|phosphatidylglycerol biosynthetic process|cardiolipin biosynthetic process|peptidyl-tyrosine dephosphorylation|small molecule metabolic process|glycerophospholipid biosynthetic process|inositol phosphate dephosphorylation|	phosphatidylinositol-4,5-bisphosphate 5-phosphatase activity|protein tyrosine phosphatase activity|protein tyrosine/serine/threonine phosphatase activity|phosphatidylglycerophosphatase activity|	20	-5.64295	-7.12214	2.31813e-12	5.64549e-10
GTPBP3	ENSG00000130299	84705	GTP binding protein 3 (mitochondrial)	nucleus|mitochondrion|	GTP catabolic process|tRNA modification|	GTPase activity|GTP binding|	20	-5.47277	-7.10389	1.28436e-12	3.96329e-10
WDR18	ENSG00000065268	57418	WD repeat domain 18	nucleoplasm|cytoplasm|	multicellular organismal development|	protein binding|	20	-4.6607	-7.08226	4.10911e-12	7.81513e-10
TCFL5	ENSG00000101190	10732	transcription factor like 5	male germ cell nucleus|nucleus|	regulation of transcription, DNA-templated|transcription from RNA polymerase II promoter|multicellular organismal development|spermatogenesis|cell differentiation|regulation of cell proliferation|regulation of cell differentiation|	DNA binding|sequence-specific DNA binding transcription factor activity|protein dimerization activity|	18	-2.78863	-7.07165	7.73891e-12	1.27724e-09
KIF23	ENSG00000137807	9493	kinesin family member 23	nucleus|nucleoplasm|centrosome|spindle|cytosol|kinesin complex|microtubule|midbody|intercellular bridge|mitotic spindle|centralspindlin complex|	mitotic spindle elongation|mitotic cell cycle|cytokinesis|microtubule-based movement|blood coagulation|metabolic process|metabolic process|antigen processing and presentation of exogenous peptide antigen via MHC class II|positive regulation of cytokinesis|spindle midzone assembly involved in mitosis|	microtubule motor activity|protein binding|ATP binding|microtubule binding|	20	-2.8155	-7.04381	1.41316e-10	1.06897e-08
RNASEK-C17orf49	ENSG00000161939	100529209	RNASEK-C17orf49 readthrough				20	-2.77363	-7.02984	3.41594e-11	3.51631e-09
FDX1	ENSG00000137714	2230	ferredoxin 1	mitochondrion|mitochondrial matrix|	steroid biosynthetic process|cholesterol metabolic process|hormone biosynthetic process|small molecule metabolic process|oxidation-reduction process|	iron ion binding|electron carrier activity|2 iron, 2 sulfur cluster binding|	20	-2.69568	-7.02007	2.12941e-13	1.50773e-10
NR2C2AP	ENSG00000184162	126382	nuclear receptor 2C2 associated protein	nucleoplasm|extracellular vesicular exosome|	transcription initiation from RNA polymerase II promoter|cell adhesion|gene expression|	protein binding|	20	-3.24269	-7.00755	2.35201e-07	4.2468e-06
SCAF4	ENSG00000156304	57466	SR-related CTD associated factor 4	nucleus|		nucleotide binding|poly(A) RNA binding|	20	-2.43697	-6.9936	9.60087e-11	7.95558e-09
SETDB1	ENSG00000143379	9869	SET domain bifurcated 1	nucleus|chromosome|cytoplasm|Golgi apparatus|plasma membrane|	inner cell mass cell proliferation|transcription, DNA-templated|regulation of transcription, DNA-templated|histone lysine methylation|bone development|	DNA binding|protein binding|zinc ion binding|histone-lysine N-methyltransferase activity|	20	-2.33389	-6.98629	1.97147e-11	2.41535e-09
KLF16	ENSG00000129911	83855	Kruppel like factor 16	nucleus|	transcription, DNA-templated|regulation of transcription from RNA polymerase II promoter|dopamine receptor signaling pathway|	DNA binding|sequence-specific DNA binding transcription factor activity|metal ion binding|	20	-3.18892	-6.9747	2.70793e-11	2.97129e-09
PITRM1	ENSG00000107959	10531	pitrilysin metallopeptidase 1	mitochondrion|mitochondrial matrix|	proteolysis|positive regulation of catalytic activity|	metalloendopeptidase activity|enzyme activator activity|metal ion binding|	20	-2.60592	-6.9664	7.11589e-12	1.23268e-09
NHP2L1	ENSG00000100138						14	-3.50187	-6.95925	2.02065e-10	1.35866e-08
TMEM41A	ENSG00000163900	90407	transmembrane protein 41A	integral component of membrane|			20	-2.67018	-6.95625	1.24598e-08	3.57386e-07
PKM	ENSG00000067225	5315	pyruvate kinase, muscle	nucleus|cytoplasm|mitochondrion|cytosol|cytosol|plasma membrane|cilium|extracellular vesicular exosome|	carbohydrate metabolic process|glucose metabolic process|glycolytic process|glycolytic process|programmed cell death|phosphorylation|small molecule metabolic process|	magnesium ion binding|pyruvate kinase activity|protein binding|ATP binding|MHC class II protein complex binding|potassium ion binding|poly(A) RNA binding|	20	-3.83898	-6.94183	1.96834e-12	5.10489e-10
RNASEH2A	ENSG00000104889	10535	ribonuclease H2 subunit A	nucleus|ribonuclease H2 complex|	DNA replication|mismatch repair|RNA catabolic process|RNA phosphodiester bond hydrolysis|RNA phosphodiester bond hydrolysis, endonucleolytic|RNA phosphodiester bond hydrolysis, endonucleolytic|	RNA binding|RNA-DNA hybrid ribonuclease activity|ribonuclease activity|metal ion binding|	20	-5.92696	-6.91401	2.25625e-12	5.56264e-10
RPL17	ENSG00000265681	6139	ribosomal protein L17	nucleus|cytosol|cytosolic large ribosomal subunit|	nuclear-transcribed mRNA catabolic process, nonsense-mediated decay|translation|translation|translational initiation|translational elongation|translational termination|SRP-dependent cotranslational protein targeting to membrane|gene expression|viral process|RNA metabolic process|mRNA metabolic process|viral life cycle|viral transcription|cellular protein metabolic process|	structural constituent of ribosome|poly(A) RNA binding|	12	-3.899	-6.85397	4.47234e-09	1.56964e-07
AL031663.1	ENSG00000268111						10	-3.97467	-6.85012	2.49526e-07	4.47712e-06
NDUFB9	ENSG00000147684	4715	NADH:ubiquinone oxidoreductase subunit B9	mitochondrial inner membrane|mitochondrial respiratory chain complex I|mitochondrial respiratory chain complex I|extracellular vesicular exosome|	mitochondrial electron transport, NADH to ubiquinone|sensory perception of sound|respiratory electron transport chain|cellular metabolic process|small molecule metabolic process|	NADH dehydrogenase (ubiquinone) activity|	20	-4.2288	-6.83594	5.60477e-09	1.87169e-07
CPSF3	ENSG00000119203	51692	cleavage and polyadenylation specific factor 3	nucleoplasm|mRNA cleavage and polyadenylation specificity factor complex|ribonucleoprotein complex|	mRNA splicing, via spliceosome|transcription from RNA polymerase II promoter|termination of RNA polymerase II transcription|mRNA polyadenylation|mRNA cleavage|histone mRNA 3'-end processing|mRNA export from nucleus|RNA splicing|gene expression|mRNA 3'-end processing|RNA phosphodiester bond hydrolysis, endonucleolytic|RNA phosphodiester bond hydrolysis, endonucleolytic|	RNA binding|endoribonuclease activity|protein binding|5'-3' exonuclease activity|metal ion binding|	20	-4.19099	-6.81789	9.98909e-12	1.51123e-09
SCO1	ENSG00000133028	6341	SCO1, cytochrome c oxidase assembly protein	mitochondrion|mitochondrial inner membrane|myofibril|	generation of precursor metabolites and energy|copper ion transport|cellular copper ion homeostasis|respiratory chain complex IV assembly|	copper ion binding|	20	-3.70812	-6.79108	1.03973e-12	3.61534e-10
SLC7A1	ENSG00000139514	6541	solute carrier family 7 member 1	plasma membrane|integral component of plasma membrane|membrane|	amino acid transmembrane transport|transport|ion transport|amino acid transport|arginine transport|transmembrane transport|	arginine transmembrane transporter activity|	20	-2.02328	-6.78456	9.20037e-09	2.80078e-07
CCS	ENSG00000173992	9973	copper chaperone for superoxide dismutase	nucleus|cytoplasm|cytosol|	superoxide metabolic process|intracellular copper ion transport|removal of superoxide radicals|copper ion transmembrane transport|positive regulation of oxidoreductase activity|oxidation-reduction process|	superoxide dismutase activity|copper ion transmembrane transporter activity|copper ion binding|protein binding|zinc ion binding|protein disulfide oxidoreductase activity|	20	-3.80759	-6.78336	2.2284e-10	1.4539e-08
QRSL1	ENSG00000130348	55278	glutaminyl-tRNA synthase (glutamine-hydrolyzing)-like 1	mitochondrion|glutamyl-tRNA(Gln) amidotransferase complex|	mitochondrial translation|glutaminyl-tRNAGln biosynthesis via transamidation|	ATP binding|glutaminyl-tRNA synthase (glutamine-hydrolyzing) activity|	20	-3.10337	-6.77857	2.03749e-09	8.44165e-08
SNRPE	ENSG00000182004	6635	small nuclear ribonucleoprotein polypeptide E	nucleus|nucleoplasm|spliceosomal complex|U7 snRNP|U1 snRNP|U4 snRNP|U12-type spliceosomal complex|cytosol|cytosol|small nuclear ribonucleoprotein complex|methylosome|pICln-Sm protein complex|SMN-Sm protein complex|extracellular vesicular exosome|catalytic step 2 spliceosome|	spliceosomal complex assembly|spliceosomal snRNP assembly|spliceosomal snRNP assembly|mRNA splicing, via spliceosome|mRNA splicing, via spliceosome|transcription from RNA polymerase II promoter|termination of RNA polymerase II transcription|histone mRNA metabolic process|RNA splicing|gene expression|RNA metabolic process|mRNA 3'-end processing|ncRNA metabolic process|hair cycle|	RNA binding|protein binding|	12	-4.44144	-6.7744	1.1446e-06	1.61881e-05
RPL32	ENSG00000144713	6161	ribosomal protein L32	cytosol|membrane|cytosolic large ribosomal subunit|	nuclear-transcribed mRNA catabolic process, nonsense-mediated decay|translation|translation|translational initiation|translational elongation|translational termination|SRP-dependent cotranslational protein targeting to membrane|gene expression|viral process|RNA metabolic process|mRNA metabolic process|viral life cycle|viral transcription|cellular protein metabolic process|	structural constituent of ribosome|poly(A) RNA binding|	16	-3.83542	-6.77069	1.42099e-10	1.07084e-08
C12orf65	ENSG00000130921	91574	chromosome 12 open reading frame 65	mitochondrion|	translational termination|cell death|	translation release factor activity|	18	-3.74815	-6.76042	7.28375e-12	1.23268e-09
CSNK2A1	ENSG00000101266	1457	casein kinase 2 alpha 1	nucleus|cytosol|plasma membrane|Sin3 complex|NuRD complex|PcG protein complex|	mitotic cell cycle|transcription, DNA-templated|regulation of transcription, DNA-templated|protein phosphorylation|signal transduction|axon guidance|positive regulation of cell proliferation|Wnt signaling pathway|positive regulation of Wnt signaling pathway|positive regulation of cell growth|negative regulation of cysteine-type endopeptidase activity involved in apoptotic process|positive regulat…	protein serine/threonine kinase activity|protein serine/threonine kinase activity|protein binding|ATP binding|protein N-terminus binding|Hsp90 protein binding|	20	-2.85961	-6.75899	7.16822e-13	2.98228e-10
CHD8	ENSG00000100888	57680	chromodomain helicase DNA binding protein 8	nucleus|protein complex|MLL1 complex|	in utero embryonic development|ATP catabolic process|transcription, DNA-templated|negative regulation of Wnt signaling pathway|DNA duplex unwinding|ATP-dependent chromatin remodeling|negative regulation of transcription, DNA-templated|positive regulation of transcription, DNA-templated|positive regulation of transcription from RNA polymerase II promoter|positive regulation of transcription from R…	p53 binding|DNA binding|DNA helicase activity|protein binding|ATP binding|beta-catenin binding|DNA-dependent ATPase activity|methylated histone binding|histone binding|armadillo repeat domain binding|	20	-2.73718	-6.72617	3.40068e-13	1.88643e-10
CGB	ENSG00000104827						16	-2.59931	-6.72495	9.58487e-09	2.89576e-07
PHIP	ENSG00000146247	55023	pleckstrin homology domain interacting protein	nucleus|extracellular vesicular exosome|	regulation of protein phosphorylation|protein import into nucleus|cytoskeleton organization|positive regulation of cell proliferation|insulin receptor signaling pathway|positive regulation of peptidyl-threonine phosphorylation|regulation of cell morphogenesis|positive regulation of peptidyl-serine phosphorylation|regulation of growth|negative regulation of apoptotic process|positive regulation of…	insulin receptor binding|protein binding|lysine-acetylated histone binding|	20	-2.79154	-6.71123	2.13263e-13	1.50773e-10
NUMA1	ENSG00000137497	4926	nuclear mitotic apparatus protein 1	Golgi membrane|spindle pole|nucleus|nucleoplasm|chromosome|cytoplasm|spindle|cytosol|spindle microtubule|nuclear matrix|dendrite|neuronal cell body|apical part of cell|	G2/M transition of mitotic cell cycle|mitotic anaphase|establishment of mitotic spindle orientation|mitotic cell cycle|nucleus organization|mitotic nuclear division|meiotic cell cycle|lung epithelial cell differentiation|	structural molecule activity|protein binding|microtubule binding|	20	-2.1115	-6.69495	8.15045e-12	1.29178e-09
RPE	ENSG00000197713	6120	ribulose-5-phosphate-3-epimerase	cytosol|	carbohydrate metabolic process|carbohydrate metabolic process|pentose-phosphate shunt|pentose-phosphate shunt|small molecule metabolic process|	ribulose-phosphate 3-epimerase activity|ribulose-phosphate 3-epimerase activity|identical protein binding|protein homodimerization activity|metal ion binding|	20	-3.10155	-6.6925	2.86743e-13	1.74531e-10
MRPL2	ENSG00000112651	51069	mitochondrial ribosomal protein L2	mitochondrion|ribosome|	translation|	structural constituent of ribosome|poly(A) RNA binding|	20	-3.34363	-6.68476	9.13854e-08	1.90101e-06
SEPSECS	ENSG00000109618	51091	Sep (O-phosphoserine) tRNA:Sec (selenocysteine) tRNA synthase	nucleus|cytoplasm|	selenocysteine incorporation|selenocysteinyl-tRNA(Sec) biosynthetic process|	tRNA binding|protein binding|transferase activity, transferring selenium-containing groups|pyridoxal phosphate binding|	20	-5.16701	-6.66428	1.30899e-13	1.25907e-10
LINC00999	ENSG00000225119	399744	long intergenic non-protein coding RNA 999				12	-4.55776	-6.64336	1.22207e-08	3.52159e-07
BIRC6	ENSG00000115760	57448	baculoviral IAP repeat containing 6	spindle pole|endosome|trans-Golgi network|microtubule organizing center|membrane|midbody|	protein phosphorylation|apoptotic process|mitotic nuclear division|positive regulation of cell proliferation|negative regulation of endopeptidase activity|negative regulation of endopeptidase activity|protein ubiquitination|regulation of cytokinesis|regulation of cell proliferation|negative regulation of apoptotic process|negative regulation of apoptotic process|labyrinthine layer development|spo…	ubiquitin-protein transferase activity|cysteine-type endopeptidase inhibitor activity|protein binding|acid-amino acid ligase activity|	20	-1.87341	-6.62805	4.78119e-12	8.75966e-10
MBD3	ENSG00000071655	53615	methyl-CpG binding domain protein 3	nuclear chromatin|heterochromatin|cytoplasm|NuRD complex|protein complex|	negative regulation of transcription from RNA polymerase II promoter|in utero embryonic development|methylation-dependent chromatin silencing|transcription, DNA-templated|tissue development|histone acetylation|ATP-dependent chromatin remodeling|	RNA polymerase II core promoter proximal region sequence-specific DNA binding|RNA polymerase II distal enhancer sequence-specific DNA binding|DNA binding|protein binding|methyl-CpG binding|nucleosomal DNA binding|	20	-1.84413	-6.60467	2.62237e-12	5.951e-10
SDHC	ENSG00000143252	6391	succinate dehydrogenase complex subunit C	mitochondrion|mitochondrial inner membrane|mitochondrial inner membrane|mitochondrial respiratory chain complex II|integral component of membrane|respiratory chain complex II|	tricarboxylic acid cycle|tricarboxylic acid cycle|aerobic respiration|respiratory electron transport chain|cellular metabolic process|small molecule metabolic process|oxidation-reduction process|	succinate dehydrogenase activity|electron carrier activity|heme binding|metal ion binding|	20	-2.73646	-6.60086	1.03439e-09	4.93003e-08
DPAGT1	ENSG00000172269	1798	dolichyl-phosphate N-acetylglucosaminephosphotransferase 1	endoplasmic reticulum membrane|endoplasmic reticulum membrane|membrane|integral component of membrane|integral component of endoplasmic reticulum membrane|integral component of endoplasmic reticulum membrane|intracellular membrane-bounded organelle|	UDP-N-acetylglucosamine metabolic process|protein N-linked glycosylation|dolichol-linked oligosaccharide biosynthetic process|protein N-linked glycosylation via asparagine|dolichol biosynthetic process|post-translational protein modification|cellular protein metabolic process|protein oligomerization|	UDP-N-acetylglucosamine-dolichyl-phosphate N-acetylglucosaminephosphotransferase activity|UDP-N-acetylglucosamine-dolichyl-phosphate N-acetylglucosaminephosphotransferase activity|phospho-N-acetylmuramoyl-pentapeptide-transferase activity|transferase activity, transferring glycosyl groups|	20	-3.16049	-6.59138	6.2808e-14	1.06339e-10
NME6	ENSG00000172113	10201	NME/NM23 nucleoside diphosphate kinase 6	mitochondrion|	nucleoside diphosphate phosphorylation|GTP biosynthetic process|UTP biosynthetic process|CTP biosynthetic process|apoptotic process|negative regulation of cell growth|negative regulation of mitosis|	nucleoside diphosphate kinase activity|ATP binding|metal ion binding|	20	-2.66237	-6.58333	2.34362e-10	1.49528e-08
SARS2	ENSG00000104835	54938	seryl-tRNA synthetase 2, mitochondrial	mitochondrion|mitochondrial matrix|	tRNA aminoacylation for protein translation|seryl-tRNA aminoacylation|gene expression|selenocysteinyl-tRNA(Sec) biosynthetic process|	serine-tRNA ligase activity|serine-tRNA ligase activity|ATP binding|poly(A) RNA binding|	18	-4.26842	-6.56678	3.1673e-09	1.22106e-07
MAU2	ENSG00000129933	23383	MAU2 sister chromatid cohesion factor	chromatin|nucleus|nucleoplasm|nucleoplasm|SMC loading complex|SMC loading complex|	mitotic cell cycle|maintenance of mitotic sister chromatid cohesion|	protein binding|protein N-terminus binding|	20	-2.44123	-6.56427	2.92744e-11	3.16005e-09
HDAC8	ENSG00000147099	55869	histone deacetylase 8	histone deacetylase complex|nuclear chromosome|nucleus|cytoplasm|cytosol|	negative regulation of transcription from RNA polymerase II promoter|mitotic cell cycle|chromatin assembly or disassembly|transcription, DNA-templated|sister chromatid cohesion|chromatin modification|histone H3 deacetylation|histone H4 deacetylation|regulation of cohesin localization to chromatin|	histone deacetylase activity|transcription factor binding|NAD-dependent histone deacetylase activity (H3-K14 specific)|metal ion binding|NAD-dependent histone deacetylase activity (H3-K9 specific)|NAD-dependent histone deacetylase activity (H4-K16 specific)|NAD-dependent histone deacetylase activity (H3-K18 specific)|	20	-3.03056	-6.56014	1.34185e-13	1.25907e-10
WDR73	ENSG00000177082	84942	WD repeat domain 73				18	-2.20253	-6.55054	3.97025e-10	2.30482e-08
MRPL43	ENSG00000055950	84545	mitochondrial ribosomal protein L43	mitochondrial ribosome|	translation|	structural constituent of ribosome|poly(A) RNA binding|	16	-5.23753	-6.51596	4.19866e-10	2.43035e-08
CTU2	ENSG00000174177	348180	cytosolic thiouridylase subunit 2	cytoplasm|protein complex|	tRNA wobble uridine modification|protein urmylation|tRNA thio-modification|	tRNA binding|protein binding|nucleotidyltransferase activity|	20	-4.45517	-6.50098	3.27777e-13	1.8702e-10
DNAJC9	ENSG00000213551	23234	DnaJ heat shock protein family (Hsp40) member C9	nucleus|	social behavior|		20	-2.83956	-6.49917	9.19723e-09	2.80078e-07
OTUD5	ENSG00000068308	55593	OTU deubiquitinase 5	cytosol|	proteolysis|negative regulation of type I interferon production|response to lipopolysaccharide|innate immune response|protein K63-linked deubiquitination|protein K48-linked deubiquitination|	ubiquitin-specific protease activity|	20	-3.18652	-6.49386	2.17186e-10	1.43142e-08
RPP30	ENSG00000148688	10556	ribonuclease P/MRP subunit p30	nucleus|nucleolar ribonuclease P complex|	tRNA processing|RNA phosphodiester bond hydrolysis|RNA phosphodiester bond hydrolysis, endonucleolytic|RNA phosphodiester bond hydrolysis, endonucleolytic|	ribonuclease P activity|poly(A) RNA binding|	20	-4.09444	-6.47076	7.12254e-08	1.52574e-06
ADSL	ENSG00000239900	158	adenylosuccinate lyase	mitochondrion|cytosol|	response to hypoxia|purine nucleobase metabolic process|purine nucleotide biosynthetic process|AMP biosynthetic process|'de novo' IMP biosynthetic process|response to nutrient|metabolic process|aerobic respiration|purine ribonucleoside monophosphate biosynthetic process|response to muscle activity|response to starvation|'de novo' AMP biosynthetic process|small molecule metabolic process|protein t…	N6-(1,2-dicarboxyethyl)AMP AMP-lyase (fumarate-forming) activity|N6-(1,2-dicarboxyethyl)AMP AMP-lyase (fumarate-forming) activity|(S)-2-(5-amino-1-(5-phospho-D-ribosyl)imidazole-4-carboxamido)succinate AMP-lyase (fumarate-forming) activity|	20	-4.3021	-6.45899	2.81074e-12	6.23672e-10
ACTR1A	ENSG00000138107	10121	ARP1 actin-related protein 1 homolog A, centractin alpha	cytoplasm|centrosome|cytosol|dynactin complex|microtubule associated complex|extracellular vesicular exosome|	G2/M transition of mitotic cell cycle|mitotic cell cycle|vesicle-mediated transport|antigen processing and presentation of exogenous peptide antigen via MHC class II|	ATP binding|	20	-3.84496	-6.45559	4.23358e-13	2.12261e-10
MRPL39	ENSG00000154719	54148	mitochondrial ribosomal protein L39	mitochondrial ribosome|	biological_process|	nucleotide binding|poly(A) RNA binding|	20	-3.68892	-6.44869	2.18949e-13	1.50773e-10
LAMTOR2	ENSG00000116586	28956	late endosomal/lysosomal adaptor, MAPK and MTOR activator 2	lysosomal membrane|late endosome|extracellular vesicular exosome|Ragulator complex|	activation of MAPKK activity|cell growth|positive regulation of TOR signaling|cellular protein localization|positive regulation of GTPase activity|cellular response to amino acid stimulus|	guanyl-nucleotide exchange factor activity|protein binding|protein complex scaffold|	20	-3.04867	-6.42781	1.15722e-10	9.3722e-09
SEPHS1	ENSG00000086475	22929	selenophosphate synthetase 1	cytoplasm|cytoplasm|plasma membrane|plasma membrane|nuclear membrane|nuclear membrane|	cellular protein modification process|phosphorylation|	selenide, water dikinase activity|protein binding|ATP binding|GTP binding|protein homodimerization activity|protein heterodimerization activity|	20	-2.60258	-6.41821	1.36041e-07	2.65826e-06
GSG2	ENSG00000177602	83903	germ cell associated 2, haspin	nucleus|chromosome|cytoplasm|centrosome|spindle|	protein phosphorylation|mitotic sister chromatid cohesion|intracellular signal transduction|protein localization to chromosome, centromeric region|regulation of spindle checkpoint|negative regulation of G1/S transition of mitotic cell cycle|histone H3-T3 phosphorylation involved in chromosome passenger complex localization to kinetochore|	DNA binding|protein kinase activity|protein binding|ATP binding|histone kinase activity (H3-T3 specific)|	20	-3.14058	-6.41673	1.22941e-06	1.72049e-05
NCL	ENSG00000115053	4691	nucleolin	nucleus|nucleoplasm|nucleolus|cell cortex|membrane|ribonucleoprotein complex|cytoplasmic ribonucleoprotein granule|extracellular vesicular exosome|	angiogenesis|positive regulation of transcription of nuclear large rRNA transcript from RNA polymerase I promoter|	nucleotide binding|RNA binding|protein binding|protein C-terminus binding|telomeric DNA binding|identical protein binding|poly(A) RNA binding|	16	-4.94187	-6.38912	6.18828e-09	2.02055e-07
MAEA	ENSG00000090316	10296	macrophage erythroblast attacher	nucleus|spindle|actomyosin contractile ring|cytoskeleton|integral component of plasma membrane|nuclear matrix|	cytoskeleton organization|cell cycle|cell adhesion|regulation of mitotic cell cycle|negative regulation of myeloid cell apoptotic process|erythrocyte maturation|enucleate erythrocyte development|cell division|	actin binding|	20	-1.83404	-6.37285	1.81381e-11	2.29479e-09
TXNRD1	ENSG00000198431	7296	thioredoxin reductase 1	nucleus|nucleolus|mitochondrion|cytosol|	mesoderm formation|signal transduction|cell proliferation|nucleobase-containing small molecule interconversion|cellular lipid metabolic process|small molecule metabolic process|cell redox homeostasis|nucleobase-containing small molecule metabolic process|oxidation-reduction process|	thioredoxin-disulfide reductase activity|protein binding|electron carrier activity|protein disulfide oxidoreductase activity|flavin adenine dinucleotide binding|NADP binding|	20	-3.375	-6.35873	1.75074e-12	4.78936e-10
HGS	ENSG00000185359	9146	hepatocyte growth factor-regulated tyrosine kinase substrate	cytoplasm|endosome|early endosome|cytosol|secretory granule|early endosome membrane|multivesicular body membrane|intracellular membrane-bounded organelle|extracellular vesicular exosome|	intracellular protein transport|signal transduction|epidermal growth factor receptor signaling pathway|negative regulation of cell proliferation|endosome to lysosome transport|endosomal transport|endosomal transport|negative regulation of epidermal growth factor receptor signaling pathway|regulation of protein catabolic process|negative regulation of JAK-STAT cascade|membrane organization|	protein binding|protein domain specific binding|metal ion binding|	20	-2.83071	-6.35073	2.68462e-11	2.97129e-09
SDHA	ENSG00000073578	6389	succinate dehydrogenase complex flavoprotein subunit A	mitochondrion|mitochondrial inner membrane|mitochondrial inner membrane|mitochondrial respiratory chain complex II|mitochondrial respiratory chain complex II|	tricarboxylic acid cycle|tricarboxylic acid cycle|succinate metabolic process|nervous system development|respiratory electron transport chain|respiratory electron transport chain|cellular metabolic process|small molecule metabolic process|oxidation-reduction process|	succinate dehydrogenase activity|protein binding|succinate dehydrogenase (ubiquinone) activity|flavin adenine dinucleotide binding|	20	-3.35369	-6.34623	6.8409e-14	1.06339e-10
CSE1L	ENSG00000124207	1434	chromosome segregation 1 like	nucleus|cytoplasm|membrane|extracellular vesicular exosome|	protein export from nucleus|apoptotic process|cell proliferation|	protein binding|importin-alpha export receptor activity|Ran GTPase binding|	18	-3.39348	-6.34616	8.12818e-12	1.29178e-09
TPI1	ENSG00000111669	7167	triosephosphate isomerase 1	extracellular space|nucleus|cytosol|extracellular vesicular exosome|	carbohydrate metabolic process|glucose metabolic process|gluconeogenesis|gluconeogenesis|glycolytic process|glycolytic process|pentose-phosphate shunt|embryo development|glyceraldehyde-3-phosphate metabolic process|small molecule metabolic process|	triose-phosphate isomerase activity|triose-phosphate isomerase activity|triose-phosphate isomerase activity|protein binding|	20	-5.5001	-6.34364	5.94804e-12	1.06056e-09
CARM1	ENSG00000142453	10498	coactivator associated arginine methyltransferase 1	nucleus|nucleoplasm|cytoplasm|cytosol|cytosol|	regulation of growth plate cartilage chondrocyte proliferation|transcription, DNA-templated|regulation of transcription, DNA-templated|regulation of transcription, DNA-templated|positive regulation of cell proliferation|pathogenesis|viral process|histone methylation|histone methylation|peptidyl-arginine methylation, to asymmetrical-dimethyl arginine|intracellular estrogen receptor signaling pathw…	transcription coactivator activity|protein binding|beta-catenin binding|protein methyltransferase activity|histone-arginine N-methyltransferase activity|protein-arginine N-methyltransferase activity|ligand-dependent nuclear receptor transcription coactivator activity|protein-arginine omega-N asymmetric methyltransferase activity|protein-arginine omega-N asymmetric methyltransferase activity|histo…	20	-2.94954	-6.34099	6.23595e-08	1.36848e-06
FZR1	ENSG00000105325	51343	fizzy and cell division cycle 20 related 1	nucleus|nucleoplasm|anaphase-promoting complex|cytosol|nuclear membrane|	mitotic cell cycle|DNA repair|mitotic nuclear division|positive regulation of cell proliferation|anaphase-promoting complex-dependent proteasomal ubiquitin-dependent protein catabolic process|anaphase-promoting complex-dependent proteasomal ubiquitin-dependent protein catabolic process|G2 DNA damage checkpoint|regulation of meiosis|positive regulation of protein catabolic process|negative regulat…	protein binding|	20	-2.90994	-6.33783	5.31446e-07	8.60692e-06
BRD8	ENSG00000112983	10902	bromodomain containing 8	Swr1 complex|nucleus|nucleus|nucleoplasm|mitochondrion|NuA4 histone acetyltransferase complex|	chromatin organization|transcription, DNA-templated|regulation of transcription, DNA-templated|regulation of transcription from RNA polymerase II promoter|signal transduction|cell surface receptor signaling pathway|intracellular receptor signaling pathway|regulation of growth|histone H4 acetylation|histone H2A acetylation|	sequence-specific DNA binding transcription factor activity|thyroid hormone receptor activity|	20	-3.28674	-6.31298	3.10468e-12	6.66671e-10
CDK10	ENSG00000185324	8558	cyclin dependent kinase 10		protein phosphorylation|traversing start control point of mitotic cell cycle|negative regulation of cell proliferation|	cyclin-dependent protein serine/threonine kinase activity|protein binding|ATP binding|	20	-2.44142	-6.30502	1.25608e-09	5.77971e-08
CTC-260F20.3	ENSG00000258674						20	-2.87544	-6.29688	1.32701e-11	1.79057e-09
MRPL10	ENSG00000159111	124995	mitochondrial ribosomal protein L10	mitochondrion|mitochondrial large ribosomal subunit|ribonucleoprotein complex|	translation|ribosome biogenesis|	structural constituent of ribosome|poly(A) RNA binding|	18	-2.49777	-6.27539	7.86993e-12	1.2867e-09
RPS27	ENSG00000177954	6232	ribosomal protein S27	nucleus|cytosol|ribosome|cytosolic small ribosomal subunit|	nuclear-transcribed mRNA catabolic process, nonsense-mediated decay|mitotic cell cycle|translation|translation|translation|translational initiation|translational elongation|translational termination|SRP-dependent cotranslational protein targeting to membrane|cell proliferation|gene expression|viral process|RNA metabolic process|mRNA metabolic process|viral life cycle|viral transcription|cellular …	DNA binding|structural constituent of ribosome|protein binding|zinc ion binding|poly(A) RNA binding|	16	-2.59459	-6.2569	1.32975e-09	6.03011e-08
DPH2	ENSG00000132768	1802	DPH2 homolog	cytoplasm|	peptidyl-diphthamide biosynthetic process from peptidyl-histidine|		20	-2.6961	-6.25672	1.13557e-12	3.71761e-10
RP11-51F16.8	ENSG00000125695						18	-1.88246	-6.21152	2.96025e-10	1.80784e-08
MRPL37	ENSG00000116221	51253	mitochondrial ribosomal protein L37	mitochondrion|mitochondrial ribosome|	translation|	structural constituent of ribosome|poly(A) RNA binding|	20	-2.20161	-6.20963	6.42375e-13	2.72941e-10
POLG2	ENSG00000256525	11232	DNA polymerase gamma 2, accessory subunit	mitochondrial chromosome|mitochondrial nucleoid|extracellular vesicular exosome|	DNA replication|DNA-dependent DNA replication|DNA repair|	DNA binding|DNA-directed DNA polymerase activity|protein binding|identical protein binding|	20	-3.79782	-6.20858	4.45833e-11	4.36436e-09
RP11-108K14.8	ENSG00000254536						20	-3.35485	-6.19591	1.76295e-10	1.25288e-08
ASPM	ENSG00000066279	259266	abnormal spindle microtubule assembly	spindle pole|nucleus|cytoplasm|midbody|	neuron migration|positive regulation of neuroblast proliferation|mitotic nuclear division|spermatogenesis|forebrain neuroblast division|negative regulation of neuron differentiation|negative regulation of asymmetric cell division|oogenesis|developmental growth|maintenance of centrosome location|positive regulation of canonical Wnt signaling pathway|	calmodulin binding|	20	-2.41171	-6.18216	9.17892e-11	7.68894e-09
TAMM41	ENSG00000144559	132001	TAM41 mitochondrial translocator assembly and maintenance homolog	extrinsic component of mitochondrial inner membrane|	protein import into mitochondrial matrix|		20	-4.91812	-6.17738	5.42356e-10	2.97879e-08
IMPDH2	ENSG00000178035	3615	inosine monophosphate dehydrogenase 2	nucleus|cytoplasm|peroxisomal membrane|cytosol|membrane|extracellular vesicular exosome|	purine nucleobase metabolic process|GMP biosynthetic process|purine ribonucleoside monophosphate biosynthetic process|small molecule metabolic process|nucleobase-containing small molecule metabolic process|oxidation-reduction process|	nucleotide binding|DNA binding|RNA binding|IMP dehydrogenase activity|adenyl nucleotide binding|metal ion binding|	20	-4.22096	-6.15651	3.28168e-11	3.43115e-09
ESCO2	ENSG00000171320	157570	establishment of sister chromatid cohesion N-acetyltransferase 2	chromatin|nucleus|nucleoplasm|Golgi apparatus|	mitotic cell cycle|regulation of DNA replication|post-translational protein acetylation|	transferase activity, transferring acyl groups|metal ion binding|	18	-2.22113	-6.15405	3.79716e-09	1.39181e-07
HSF1	ENSG00000185122	3297	heat shock transcription factor 1	nucleus|cytoplasm|protein complex|pronucleus|	negative regulation of transcription from RNA polymerase II promoter|embryonic placenta development|transcription, DNA-templated|protein phosphorylation|defense response|female meiotic division|spermatogenesis|negative regulation of cell proliferation|response to lipopolysaccharide|negative regulation of tumor necrosis factor production|cellular response to heat|positive regulation of multicellul…	RNA polymerase II core promoter proximal region sequence-specific DNA binding|RNA polymerase II core promoter proximal region sequence-specific DNA binding transcription factor activity involved in negative regulation of transcription|RNA polymerase II intronic transcription regulatory region sequence-specific DNA binding|chromatin binding|sequence-specific DNA binding transcription factor activi…	20	-2.93926	-6.13571	1.05002e-12	3.61534e-10
EED	ENSG00000074266	8726	embryonic ectoderm development	sex chromatin|nucleus|nucleus|nucleoplasm|cytoplasm|ESC/E(Z) complex|pronucleus|	regulation of gene expression by genetic imprinting|transcription, DNA-templated|histone methylation|negative regulation of transcription, DNA-templated|positive regulation of histone H3-K27 methylation|	chromatin binding|protein binding|histone methyltransferase activity|identical protein binding|	20	-2.00449	-6.12397	1.14731e-09	5.37837e-08
G3BP1	ENSG00000145907	10146	G3BP stress granule assembly factor 1	nucleus|cytoplasm|cytosol|plasma membrane|cytoplasmic stress granule|	ATP catabolic process|transport|Ras protein signal transduction|DNA duplex unwinding|negative regulation of canonical Wnt signaling pathway|nucleic acid phosphodiester bond hydrolysis|	DNA binding|mRNA binding|ATP-dependent DNA helicase activity|ATP-dependent RNA helicase activity|endonuclease activity|protein binding|ATP binding|poly(A) RNA binding|	20	-2.40281	-6.11993	2.23509e-10	1.4539e-08
YBEY	ENSG00000182362	54059	ybeY metallopeptidase (putative)	nucleus|mitochondrion|	rRNA processing|proteolysis|	metalloendopeptidase activity|metal ion binding|	20	-5.36155	-6.11334	4.15975e-12	7.83681e-10
C10orf2	ENSG00000107815						20	-4.25502	-6.07667	4.38224e-13	2.12261e-10
TAF4	ENSG00000130699	6874	TATA-box binding protein associated factor 4	nucleus|nucleoplasm|transcription factor TFIID complex|cytoplasm|transcription factor TFTC complex|MLL1 complex|	ovarian follicle development|DNA-templated transcription, initiation|transcription from RNA polymerase II promoter|transcription initiation from RNA polymerase II promoter|transcription initiation from RNA polymerase II promoter|transcription elongation from RNA polymerase II promoter|gene expression|viral process|positive regulation of transcription, DNA-templated|	DNA binding|sequence-specific DNA binding transcription factor activity|transcription coactivator activity|protein binding|protein heterodimerization activity|	16	-2.24913	-6.06759	4.91397e-08	1.10884e-06
RPS27A	ENSG00000143947	6233	ribosomal protein S27a	nucleoplasm|cytosol|plasma membrane|endosome membrane|small ribosomal subunit|membrane|cytosolic small ribosomal subunit|endocytic vesicle membrane|extracellular vesicular exosome|	G1/S transition of mitotic cell cycle|G2/M transition of mitotic cell cycle|negative regulation of transcription from RNA polymerase II promoter|nuclear-transcribed mRNA catabolic process, nonsense-mediated decay|activation of MAPK activity|protein polyubiquitination|mitotic cell cycle|toll-like receptor signaling pathway|antigen processing and presentation of peptide antigen via MHC class I|anti…	structural constituent of ribosome|poly(A) RNA binding|metal ion binding|	16	-2.7199	-6.06212	2.29444e-07	4.15789e-06
COX11	ENSG00000166260	1353	COX11, cytochrome c oxidase copper chaperone	mitochondrion|mitochondrial inner membrane|integral component of membrane|	respiratory gaseous exchange|respiratory chain complex IV assembly|negative regulation of glucokinase activity|hydrogen ion transmembrane transport|	cytochrome-c oxidase activity|copper ion binding|electron carrier activity|	20	-4.8062	-6.05825	1.23689e-10	9.82184e-09
RQCD1	ENSG00000144580						20	-3.34888	-6.04418	1.2393e-12	3.96329e-10
COX15	ENSG00000014919	1355	COX15, cytochrome c oxidase assembly homolog	mitochondrion|mitochondrial inner membrane|mitochondrial respiratory chain|integral component of membrane|	mitochondrial electron transport, cytochrome c to oxygen|porphyrin-containing compound metabolic process|heme biosynthetic process|heme a biosynthetic process|heme a biosynthetic process|respiratory gaseous exchange|respiratory chain complex IV assembly|small molecule metabolic process|cellular respiration|oxidation-reduction process|hydrogen ion transmembrane transport|hydrogen ion transmembrane…	cytochrome-c oxidase activity|cytochrome-c oxidase activity|oxidoreductase activity, acting on the CH-CH group of donors|	20	-2.77721	-6.04251	8.42054e-13	3.19222e-10
MYC	ENSG00000136997	4609	MYC proto-oncogene, bHLH transcription factor	nucleus|nucleoplasm|nucleoplasm|nucleolus|spindle|protein complex|	negative regulation of transcription from RNA polymerase II promoter|MAPK cascade|branching involved in ureteric bud morphogenesis|positive regulation of mesenchymal cell proliferation|energy reserve metabolic process|chromatin remodeling|transcription, DNA-templated|transcription initiation from RNA polymerase II promoter|cellular iron ion homeostasis|cellular response to DNA damage stimulus|cel…	RNA polymerase II core promoter proximal region sequence-specific DNA binding|RNA polymerase II core promoter proximal region sequence-specific DNA binding transcription factor activity involved in positive regulation of transcription|DNA binding|DNA binding|sequence-specific DNA binding transcription factor activity|protein binding|transcription factor binding|protein complex binding|protein dim…	20	-5.10816	-6.04153	7.19391e-12	1.23268e-09
SOD1	ENSG00000142168	6647	superoxide dismutase 1	extracellular region|extracellular space|nucleus|cytoplasm|mitochondrion|mitochondrial intermembrane space|mitochondrial matrix|peroxisome|peroxisome|cytosol|cytosol|plasma membrane|extracellular matrix|cytoplasmic vesicle|dendrite cytoplasm|neuronal cell body|protein complex|extracellular vesicular exosome|	activation of MAPK activity|response to superoxide|ovarian follicle development|positive regulation of cytokine production|placenta development|retina homeostasis|response to amphetamine|myeloid cell homeostasis|platelet degranulation|glutathione metabolic process|superoxide metabolic process|superoxide metabolic process|cellular iron ion homeostasis|spermatogenesis|embryo implantation|embryo imp…	superoxide dismutase activity|superoxide dismutase activity|superoxide dismutase activity|copper ion binding|protein binding|zinc ion binding|protein phosphatase 2B binding|identical protein binding|protein homodimerization activity|Rac GTPase binding|chaperone binding|	12	-3.59042	-6.0248	7.65065e-07	1.16896e-05
RPUSD3	ENSG00000156990	285367	RNA pseudouridylate synthase domain containing 3		pseudouridine synthesis|	pseudouridine synthase activity|poly(A) RNA binding|	20	-2.8511	-6.00635	1.22739e-11	1.73836e-09
TUBB4B	ENSG00000188229	10383	tubulin beta 4B class IVb	nucleus|cytosol|cytoskeleton|microtubule|extracellular vesicular exosome|	G2/M transition of mitotic cell cycle|mitotic cell cycle|GTP catabolic process|protein folding|cellular component movement|microtubule-based process|natural killer cell mediated cytotoxicity|cellular protein metabolic process|'de novo' posttranslational protein folding|protein polymerization|	double-stranded RNA binding|GTPase activity|structural constituent of cytoskeleton|GTP binding|MHC class I protein binding|unfolded protein binding|	20	-2.22668	-6.00029	1.61421e-10	1.1808e-08
NQO1	ENSG00000181019	1728	NAD(P)H quinone dehydrogenase 1	cytoplasm|cytosol|neuronal cell body|extracellular vesicular exosome|	regulation of cellular amino acid metabolic process|xenobiotic metabolic process|nitric oxide biosynthetic process|synaptic transmission, cholinergic|aging|response to nutrient|response to toxic substance|removal of superoxide radicals|response to estradiol|cellular nitrogen compound metabolic process|negative regulation of catalytic activity|positive regulation of neuron apoptotic process|small …	NAD(P)H dehydrogenase (quinone) activity|cytochrome-b5 reductase activity, acting on NAD(P)H|superoxide dismutase activity|protein binding|poly(A) RNA binding|	20	-1.83009	-5.98424	9.9459e-10	4.77451e-08
COX10	ENSG00000006695	1352	COX10, heme A:farnesyltransferase cytochrome c oxidase assembly factor	mitochondrion|mitochondrial inner membrane|integral component of membrane|	mitochondrial fission|mitochondrial electron transport, cytochrome c to oxygen|porphyrin-containing compound metabolic process|heme biosynthetic process|heme a biosynthetic process|respiratory chain complex IV assembly|aerobic respiration|small molecule metabolic process|cellular respiration|heme O biosynthetic process|hydrogen ion transmembrane transport|	cytochrome-c oxidase activity|farnesyltranstransferase activity|protoheme IX farnesyltransferase activity|	20	-3.17399	-5.98354	1.36866e-11	1.83437e-09
ZWILCH	ENSG00000174442	55055	zwilch kinetochore protein	kinetochore|condensed chromosome kinetochore|cytosol|	mitotic cell cycle|mitotic nuclear division|mitotic cell cycle checkpoint|	protein binding|	20	-2.83753	-5.97388	1.20733e-09	5.6021e-08
MRP63	ENSG00000173141						20	-6.06719	-5.96068	1.41833e-13	1.25907e-10
PYGO2	ENSG00000163348	90780	pygopus family PHD finger 2	nucleus|	in utero embryonic development|kidney development|lens development in camera-type eye|brain development|post-embryonic development|mammary gland development|regulation of mammary gland epithelial cell proliferation|developmental growth|regulation of histone H3-K4 methylation|palate development|canonical Wnt signaling pathway|	protein binding|zinc ion binding|histone binding|	20	-1.83627	-5.95826	1.86758e-10	1.29499e-08
USO1	ENSG00000138768	8615	USO1 vesicle transport factor	Golgi membrane|nucleolus|endoplasmic reticulum|Golgi apparatus|Golgi stack|cytosol|ER to Golgi transport vesicle membrane|membrane|	mitotic cell cycle|intracellular protein transport|ER to Golgi vesicle-mediated transport|transcytosis|Golgi vesicle docking|vesicle fusion with Golgi apparatus|membrane fusion|	protein transporter activity|poly(A) RNA binding|	20	-2.07743	-5.9558	3.54445e-09	1.31811e-07
PRPF19	ENSG00000110107	27339	pre-mRNA processing factor 19	ubiquitin ligase complex|Prp19 complex|nucleus|cytoplasm|lipid particle|spindle|membrane|nuclear speck|catalytic step 2 spliceosome|	protein polyubiquitination|spliceosomal complex assembly|mRNA splicing, via spliceosome|mRNA splicing, via spliceosome|inner cell mass cell proliferation|DNA repair|lipid biosynthetic process|negative regulation of neuron differentiation|positive regulation of mRNA splicing, via spliceosome|positive regulation of astrocyte differentiation|	DNA binding|ubiquitin-protein transferase activity|protein binding|ubiquitin-ubiquitin ligase activity|identical protein binding|	16	-4.35914	-5.95228	2.70622e-11	2.97129e-09
DNM2	ENSG00000079805	1785	dynamin 2	Golgi membrane|cytoplasm|Golgi apparatus|cytosol|microtubule|plasma membrane|postsynaptic density|cell junction|midbody|endocytic vesicle membrane|postsynaptic membrane|extracellular vesicular exosome|	G2/M transition of mitotic cell cycle|GTP catabolic process|GTP catabolic process|GTP catabolic process|regulation of transcription, DNA-templated|post-Golgi vesicle-mediated transport|endocytosis|signal transduction|cell death|antigen processing and presentation of exogenous peptide antigen via MHC class II|receptor internalization|transferrin transport|positive regulation of apoptotic process|s…	GTPase activity|GTPase activity|protein binding|GTP binding|microtubule binding|enzyme binding|	20	-2.85495	-5.9474	2.74525e-10	1.6973e-08
FOXRED1	ENSG00000110074	55572	FAD dependent oxidoreductase domain containing 1	mitochondrion|integral component of membrane|	biological_process|oxidation-reduction process|	oxidoreductase activity|	20	-3.09698	-5.94283	8.11977e-09	2.52967e-07
PNPT1	ENSG00000138035	87178	polyribonucleotide nucleotidyltransferase 1	cytoplasm|mitochondrion|mitochondrial intermembrane space|membrane|mitochondrial degradosome|	mitochondrial RNA catabolic process|mitochondrial mRNA catabolic process|positive regulation of mitochondrial RNA catabolic process|mitochondrial RNA 5'-end processing|mitochondrial RNA 3'-end processing|RNA catabolic process|mRNA catabolic process|cellular response to oxidative stress|cellular response to interferon-beta|RNA import into mitochondrion|rRNA import into mitochondrion|regulation of …	3'-5'-exoribonuclease activity|polyribonucleotide nucleotidyltransferase activity|protein binding|poly(U) RNA binding|poly(G) binding|miRNA binding|poly(A) RNA binding|	20	-3.06686	-5.93214	1.15104e-08	3.36056e-07
PTGES3L	ENSG00000267060	100885848	prostaglandin E synthase 3 like				20	-1.83848	-5.9278	5.09175e-08	1.14378e-06
COX6C	ENSG00000164919	1345	cytochrome c oxidase subunit 6C	mitochondrion|mitochondrial inner membrane|integral component of membrane|	generation of precursor metabolites and energy|respiratory electron transport chain|cellular metabolic process|small molecule metabolic process|hydrogen ion transmembrane transport|	cytochrome-c oxidase activity|	20	-2.43826	-5.92486	1.72751e-09	7.419e-08
MRTO4	ENSG00000053372	51154	MRT4 homolog, ribosome maturation factor	nucleus|nucleolus|nuclear membrane|	ribosome biogenesis|	poly(A) RNA binding|	20	-3.47959	-5.92148	1.18125e-10	9.47375e-09
WBSCR16	ENSG00000174374						20	-4.34031	-5.92007	1.44183e-10	1.08245e-08
TCEB2	ENSG00000103363						20	-4.7573	-5.90974	2.46592e-11	2.81397e-09
ATPAF2	ENSG00000171953	91647	ATP synthase mitochondrial F1 complex assembly factor 2	mitochondrion|nuclear speck|	proton-transporting ATP synthase complex assembly|	protein binding|	20	-3.25266	-5.90809	6.71348e-11	5.94824e-09
SLC7A5	ENSG00000103257	8140	solute carrier family 7 member 5	nucleus|nucleolus|cytosol|plasma membrane|plasma membrane|membrane|integral component of membrane|apical plasma membrane|extracellular vesicular exosome|	cellular amino acid metabolic process|transport|ion transport|amino acid transport|nervous system development|blood coagulation|neutral amino acid transport|cell differentiation|leukocyte migration|transmembrane transport|L-alpha-amino acid transmembrane transport|	amino acid transmembrane transporter activity|neutral amino acid transmembrane transporter activity|L-amino acid transmembrane transporter activity|peptide antigen binding|	20	-3.75828	-5.90729	1.29951e-11	1.77747e-09
MRPL4	ENSG00000105364	51073	mitochondrial ribosomal protein L4	mitochondrion|ribosome|	translation|	structural constituent of ribosome|poly(A) RNA binding|	20	-4.26786	-5.90598	4.97919e-14	1.06339e-10
TBL3	ENSG00000183751	10607	transducin beta like 3	nucleus|nucleolus|small-subunit processome|	rRNA processing|G-protein coupled receptor signaling pathway coupled to cGMP nucleotide second messenger|intracellular signal transduction|	receptor signaling protein activity|protein binding|poly(A) RNA binding|	20	-3.6057	-5.90381	3.3953e-11	3.51317e-09
GTF2H4	ENSG00000213780	2968	general transcription factor IIH subunit 4	core TFIIH complex|nucleoplasm|holo TFIIH complex|	nucleotide-excision repair, DNA damage removal|ATP catabolic process|DNA repair|transcription-coupled nucleotide-excision repair|nucleotide-excision repair|regulation of transcription, DNA-templated|transcription from RNA polymerase I promoter|transcription initiation from RNA polymerase I promoter|transcription elongation from RNA polymerase I promoter|termination of RNA polymerase I transcripti…	sequence-specific DNA binding transcription factor activity|ATP-dependent DNA helicase activity|protein kinase activity|protein binding|DNA-dependent ATPase activity|RNA polymerase II carboxy-terminal domain kinase activity|	20	-2.71694	-5.88644	1.61333e-07	3.05578e-06
CTU1	ENSG00000142544	90353	cytosolic thiouridylase subunit 1	mitochondrion|cytosol|	tRNA wobble uridine modification|protein urmylation|tRNA thio-modification|	tRNA binding|protein binding|nucleotidyltransferase activity|	20	-3.72907	-5.88596	4.66626e-08	1.06133e-06
CDC123	ENSG00000151465	8872	cell division cycle 123	cytoplasm|	cell cycle arrest|regulation of mitotic cell cycle|positive regulation of cell proliferation|cell division|		18	-3.02385	-5.87888	2.95271e-12	6.40932e-10
AL118506.1	ENSG00000267848						20	-1.90971	-5.87023	3.30589e-08	7.98291e-07
RAD9A	ENSG00000172613	5883	RAD9 checkpoint clamp component A	nucleus|nucleoplasm|cytoplasm|checkpoint clamp complex|	DNA replication checkpoint|DNA damage checkpoint|DNA catabolic process, exonucleolytic|DNA replication|DNA repair|cellular response to DNA damage stimulus|intra-S DNA damage checkpoint|cellular response to ionizing radiation|nucleic acid phosphodiester bond hydrolysis|positive regulation of intrinsic apoptotic signaling pathway in response to DNA damage|	protein binding|3'-5' exonuclease activity|exodeoxyribonuclease III activity|SH3 domain binding|enzyme binding|protein kinase binding|histone deacetylase binding|	20	-3.48786	-5.86079	8.62842e-11	7.39526e-09
MDH2	ENSG00000146701	4191	malate dehydrogenase 2	nucleus|mitochondrion|mitochondrial inner membrane|mitochondrial matrix|plasma membrane|extracellular vesicular exosome|	carbohydrate metabolic process|glucose metabolic process|gluconeogenesis|tricarboxylic acid cycle|oxaloacetate metabolic process|malate metabolic process|malate metabolic process|internal protein amino acid acetylation|NADH metabolic process|cellular metabolic process|cellular carbohydrate metabolic process|small molecule metabolic process|	L-malate dehydrogenase activity|L-malate dehydrogenase activity|L-malate dehydrogenase activity|protein self-association|poly(A) RNA binding|malate dehydrogenase (NADP+) activity|	20	-1.89771	-5.84677	1.9645e-08	5.17993e-07
NDUFS7	ENSG00000115286	374291	NADH:ubiquinone oxidoreductase core subunit S7	mitochondrial inner membrane|mitochondrial respiratory chain complex I|mitochondrial respiratory chain complex I|mitochondrial respiratory chain complex I|neuron projection|neuronal cell body|synaptic membrane|	mitochondrial electron transport, NADH to ubiquinone|respiratory electron transport chain|mitochondrial respiratory chain complex I assembly|cellular metabolic process|small molecule metabolic process|	protease binding|NADH dehydrogenase activity|protein binding|NADH dehydrogenase (ubiquinone) activity|oxidoreductase activity, acting on NAD(P)H, quinone or similar compound as acceptor|metal ion binding|quinone binding|4 iron, 4 sulfur cluster binding|	20	-2.38402	-5.8423	2.881e-13	1.74531e-10
BRAP	ENSG00000089234	8315	BRCA1 associated protein	ubiquitin ligase complex|cytoplasm|nuclear membrane|	MAPK cascade|Ras protein signal transduction|negative regulation of signal transduction|protein ubiquitination|protein ubiquitination|	nucleotide binding|ubiquitin-protein transferase activity|protein binding|nuclear localization sequence binding|zinc ion binding|ligase activity|	20	-2.49254	-5.8353	1.24169e-11	1.74623e-09
ALG12	ENSG00000182858	79087	ALG12, alpha-1,6-mannosyltransferase	endoplasmic reticulum|endoplasmic reticulum membrane|membrane|integral component of membrane|	protein folding|protein N-linked glycosylation|dolichol-linked oligosaccharide biosynthetic process|dolichol-linked oligosaccharide biosynthetic process|protein N-linked glycosylation via asparagine|post-translational protein modification|cellular protein metabolic process|mannosylation|mannosylation|	alpha-1,6-mannosyltransferase activity|dol-P-Man:Man(7)GlcNAc(2)-PP-Dol alpha-1,6-mannosyltransferase activity|	20	-1.6455	-5.83525	1.69864e-10	1.22461e-08
PFAS	ENSG00000178921	5198	phosphoribosylformylglycinamidine synthase	cytosol|extracellular vesicular exosome|	purine nucleobase metabolic process|'de novo' IMP biosynthetic process|'de novo' IMP biosynthetic process|glutamine metabolic process|purine ribonucleoside monophosphate biosynthetic process|response to drug|small molecule metabolic process|nucleobase-containing small molecule metabolic process|	phosphoribosylformylglycinamidine synthase activity|ATP binding|	20	-2.79019	-5.83106	3.82551e-12	7.58773e-10
RPL13	ENSG00000167526	6137	ribosomal protein L13	nucleus|nucleolus|cytoplasm|cytosol|membrane|cytosolic large ribosomal subunit|cytosolic ribosome|	nuclear-transcribed mRNA catabolic process, nonsense-mediated decay|translation|translation|translational initiation|translational elongation|translational termination|SRP-dependent cotranslational protein targeting to membrane|gene expression|viral process|RNA metabolic process|mRNA metabolic process|viral life cycle|viral transcription|cellular protein metabolic process|	RNA binding|structural constituent of ribosome|protein binding|poly(A) RNA binding|	20	-4.34812	-5.82718	1.95587e-09	8.1713e-08
MTFMT	ENSG00000103707	123263	mitochondrial methionyl-tRNA formyltransferase	mitochondrion|	translational initiation|conversion of methionyl-tRNA to N-formyl-methionyl-tRNA|	methionyl-tRNA formyltransferase activity|	20	-2.7411	-5.82705	2.20909e-11	2.59503e-09
UNC45A	ENSG00000140553	55898	unc-45 myosin chaperone A	nucleus|cytoplasm|Golgi apparatus|perinuclear region of cytoplasm|	muscle organ development|cell differentiation|chaperone-mediated protein folding|	Hsp90 protein binding|	18	-2.07641	-5.82668	2.02803e-09	8.41989e-08
TRAF2	ENSG00000127191	7186	TNF receptor associated factor 2	cytoplasm|cytosol|cell cortex|cytoplasmic side of plasma membrane|CD40 receptor complex|membrane raft|	positive regulation of T cell cytokine production|protein complex assembly|apoptotic process|activation of cysteine-type endopeptidase activity involved in apoptotic process|signal transduction|activation of NF-kappaB-inducing kinase activity|protein catabolic process|positive regulation of interleukin-2 production|tumor necrosis factor-mediated signaling pathway|negative regulation of glial cell…	ubiquitin-protein transferase activity|signal transducer activity|tumor necrosis factor receptor binding|CD40 receptor binding|protein binding|zinc ion binding|ligase activity|enzyme binding|protein phosphatase binding|mitogen-activated protein kinase kinase kinase binding|ubiquitin protein ligase binding|thioesterase binding|protein complex binding|identical protein binding|sphingolipid binding|	18	-1.98822	-5.82507	4.85776e-08	1.09988e-06
GMPPB	ENSG00000173540	29925	GDP-mannose pyrophosphorylase B	cytoplasm|mitochondrion|extracellular vesicular exosome|	dolichol-linked oligosaccharide biosynthetic process|GDP-mannose biosynthetic process|GDP-mannose biosynthetic process|protein N-linked glycosylation via asparagine|post-translational protein modification|cellular protein metabolic process|	mannose-1-phosphate guanylyltransferase activity|GTP binding|	18	-2.88278	-5.82093	3.07904e-07	5.40343e-06
ASNA1	ENSG00000198356	439	arsA arsenite transporter, ATP-binding, homolog 1 (bacterial)	nucleus|nucleolus|cytoplasm|endoplasmic reticulum|extracellular vesicular exosome|	ATP catabolic process|transport|inorganic anion transport|protein insertion into ER membrane|	transporter activity|ATP binding|arsenite transmembrane transporter activity|ATPase activity|metal ion binding|	20	-2.50907	-5.81394	2.57143e-09	1.03531e-07
MTO1	ENSG00000135297	25821	mitochondrial tRNA translation optimization 1	mitochondrion|	oxidation-reduction process|mitochondrial tRNA wobble uridine modification|	poly(A) RNA binding|flavin adenine dinucleotide binding|	20	-3.65644	-5.80091	2.15525e-11	2.57726e-09
WRAP53	ENSG00000141499	55135	WD repeat containing antisense to TP53	nucleus|telomerase holoenzyme complex|cytoplasm|Cajal body|	telomere formation via telomerase|positive regulation of telomerase activity|	RNA binding|protein binding|	20	-3.60742	-5.79462	1.9339e-08	5.11523e-07
DCLRE1B	ENSG00000118655	64858	DNA cross-link repair 1B	chromosome, telomeric region|nucleus|cytoplasm|centrosome|	cell cycle checkpoint|telomere maintenance|DNA repair|telomeric loop formation|protection from non-homologous end joining at telomere|telomeric 3' overhang formation|nucleic acid phosphodiester bond hydrolysis|nucleic acid phosphodiester bond hydrolysis|	protein binding|5'-3' exonuclease activity|	20	-2.62797	-5.79022	8.66148e-10	4.27086e-08
PDHA1	ENSG00000131828	5160	pyruvate dehydrogenase (lipoamide) alpha 1	nucleus|mitochondrion|mitochondrial matrix|pyruvate dehydrogenase complex|	glucose metabolic process|acetyl-CoA biosynthetic process from pyruvate|pyruvate metabolic process|glycolytic process|tricarboxylic acid cycle|regulation of acetyl-CoA biosynthetic process from pyruvate|cellular metabolic process|small molecule metabolic process|	pyruvate dehydrogenase activity|pyruvate dehydrogenase (acetyl-transferring) activity|	20	-2.61221	-5.77506	1.21313e-10	9.6905e-09
TRMT61A	ENSG00000166166	115708	tRNA methyltransferase 61A	nucleus|tRNA (m1A) methyltransferase complex|	tRNA methylation|	tRNA (adenine-N1-)-methyltransferase activity|	18	-3.57139	-5.77102	1.55893e-07	2.96493e-06
EIF2B4	ENSG00000115211	8890	eukaryotic translation initiation factor 2B subunit delta	cytoplasm|cytosol|eukaryotic translation initiation factor 2B complex|	ovarian follicle development|translation|translational initiation|translational initiation|regulation of translation|regulation of translational initiation|response to heat|response to heat|response to glucose|gene expression|oligodendrocyte development|negative regulation of translational initiation in response to stress|myelination|response to peptide hormone|positive regulation of GTPase activ…	translation initiation factor activity|guanyl-nucleotide exchange factor activity|guanyl-nucleotide exchange factor activity|protein binding|translation initiation factor binding|	18	-2.7948	-5.76636	1.40954e-10	1.06897e-08
USP7	ENSG00000187555	7874	ubiquitin specific peptidase 7	nucleus|cytosol|PML body|	transcription-coupled nucleotide-excision repair|ubiquitin-dependent protein catabolic process|multicellular organismal development|maintenance of DNA methylation|viral process|protein deubiquitination|protein deubiquitination|negative regulation of NF-kappaB transcription factor activity|regulation of sequence-specific DNA binding transcription factor activity|	p53 binding|cysteine-type endopeptidase activity|ubiquitin thiolesterase activity|ubiquitin thiolesterase activity|ubiquitin-specific protease activity|ubiquitin-specific protease activity|protein binding|protein C-terminus binding|transcription factor binding|ubiquitin protein ligase binding|	20	-3.59286	-5.75209	6.4459e-11	5.7724e-09
TBCB	ENSG00000105254	1155	tubulin folding cofactor B	nucleus|cytoplasm|microtubule|microtubule cytoskeleton|	nervous system development|cell differentiation|cellular protein metabolic process|'de novo' posttranslational protein folding|	protein binding|	18	-3.92345	-5.74939	4.90755e-09	1.68681e-07
MRPL46	ENSG00000259494	26589	mitochondrial ribosomal protein L46	cellular_component|mitochondrion|ribosome|	biological_process|metabolic process|	molecular_function|hydrolase activity|	20	-3.32746	-5.74834	2.14336e-11	2.57726e-09
GMPS	ENSG00000163655	8833	guanine monophosphate synthase	cytoplasm|cytosol|	purine nucleobase metabolic process|GMP biosynthetic process|glutamine metabolic process|purine nucleobase biosynthetic process|purine ribonucleoside monophosphate biosynthetic process|small molecule metabolic process|nucleobase-containing small molecule metabolic process|	GMP synthase activity|GMP synthase (glutamine-hydrolyzing) activity|ATP binding|pyrophosphatase activity|	18	-2.34746	-5.74601	1.12448e-09	5.30871e-08
SREBF1	ENSG00000072310	6720	sterol regulatory element binding transcription factor 1	Golgi membrane|nucleus|nuclear envelope|nucleoplasm|cytoplasm|endoplasmic reticulum|endoplasmic reticulum membrane|cytosol|ER to Golgi transport vesicle membrane|integral component of membrane|protein complex|	negative regulation of transcription from RNA polymerase II promoter|regulation of heart rate by chemical signal|transcription, DNA-templated|regulation of transcription from RNA polymerase II promoter|lipid metabolic process|aging|cholesterol metabolic process|insulin receptor signaling pathway|lipid biosynthetic process|cellular response to starvation|response to glucose|positive regulation of …	DNA binding|chromatin binding|sequence-specific DNA binding transcription factor activity|protein binding|protein kinase binding|protein complex binding|sterol response element binding|sequence-specific DNA binding|protein dimerization activity|	20	-3.56999	-5.74514	1.02344e-11	1.53671e-09
WDR33	ENSG00000136709	55339	WD repeat domain 33	collagen trimer|nucleus|	postreplication repair|mRNA processing|spermatogenesis|	poly(A) RNA binding|	20	-2.48262	-5.73863	4.30545e-13	2.12261e-10
ZSWIM7	ENSG00000214941	125150	zinc finger SWIM-type containing 7	nucleus|Shu complex|	double-strand break repair via homologous recombination|protein stabilization|	protein binding|zinc ion binding|	20	-2.06159	-5.72814	1.22529e-08	3.52579e-07
NDUFS5	ENSG00000168653	4725	NADH:ubiquinone oxidoreductase subunit S5	mitochondrion|mitochondrial inner membrane|mitochondrial respiratory chain complex I|mitochondrial respiratory chain complex I|mitochondrial intermembrane space|	mitochondrial electron transport, NADH to ubiquinone|respiratory electron transport chain|mitochondrial respiratory chain complex I assembly|cellular metabolic process|small molecule metabolic process|	NADH dehydrogenase (ubiquinone) activity|	20	-4.07049	-5.72562	9.31115e-14	1.16215e-10
BTAF1	ENSG00000095564	9044	B-TFIID TATA-box binding protein associated factor 1	nucleus|	metabolic process|negative regulation of chromatin binding|negative regulation of transcription, DNA-templated|	DNA binding|sequence-specific DNA binding transcription factor activity|helicase activity|ATP binding|	20	-5.02117	-5.72182	3.01231e-10	1.82845e-08
IGHV7-81	ENSG00000211979	28378	immunoglobulin heavy variable 7-81 (non-functional)				20	-1.51763	-5.71789	5.50197e-09	1.84353e-07
NOA1	ENSG00000084092	84273	nitric oxide associated 1	mitochondrion|extrinsic component of mitochondrial inner membrane|	GTP catabolic process|apoptotic process|regulation of cell death|mitochondrial translation|ribosome biogenesis|regulation of cellular respiration|	GTPase activity|protein binding|GTP binding|poly(A) RNA binding|	20	-4.00138	-5.71296	1.13646e-11	1.66876e-09
MED16	ENSG00000175221	10025	mediator complex subunit 16	nucleus|nucleoplasm|membrane|mediator complex|	regulation of transcription from RNA polymerase II promoter|transcription from RNA polymerase II promoter|transcription initiation from RNA polymerase II promoter|transcription initiation from RNA polymerase II promoter|gene expression|intracellular steroid hormone receptor signaling pathway|androgen receptor signaling pathway|positive regulation of transcription, DNA-templated|positive regulatio…	transcription cofactor activity|transcription coactivator activity|catalytic activity|receptor activity|thyroid hormone receptor coactivator activity|vitamin D receptor binding|thyroid hormone receptor binding|	20	-1.95141	-5.70642	7.11135e-11	6.20147e-09
RP1-309K20.6	ENSG00000272897						16	-3.48578	-5.70092	1.87037e-05	0.00017462
PELO	ENSG00000152684	53918	pelota homolog (Drosophila)	nucleus|cytoplasm|	cell cycle|cell proliferation|chromosome organization|cell division|nuclear-transcribed mRNA catabolic process, non-stop decay|nuclear-transcribed mRNA catabolic process, no-go decay|RNA surveillance|nucleic acid phosphodiester bond hydrolysis|	endonuclease activity|metal ion binding|	20	-5.2389	-5.69157	6.24997e-11	5.70291e-09
AC027307.3	ENSG00000268798						18	-1.93684	-5.68816	1.82034e-09	7.7181e-08
CXorf56	ENSG00000018610	63932	chromosome X open reading frame 56				20	-2.86328	-5.68488	1.25066e-07	2.46551e-06
TRAIP	ENSG00000183763	10293	TRAF interacting protein	nucleolus|perinuclear region of cytoplasm|	apoptotic process|signal transduction|cell proliferation|protein ubiquitination|intracellular signal transduction|	receptor signaling protein activity|protein binding|zinc ion binding|ligase activity|	18	-2.84606	-5.68243	1.37587e-10	1.05607e-08
TFDP1	ENSG00000198176	7027	transcription factor Dp-1	nucleoplasm|transcription factor complex|	G1/S transition of mitotic cell cycle|mitotic cell cycle|transcription, DNA-templated|regulation of transcription from RNA polymerase II promoter|transcription initiation from RNA polymerase II promoter|apoptotic process|transforming growth factor beta receptor signaling pathway|Notch signaling pathway|cell proliferation|gene expression|positive regulation of transcription from RNA polymerase II …	DNA binding|sequence-specific DNA binding transcription factor activity|transcription coactivator activity|protein binding|transcription factor binding|protein domain specific binding|	20	-1.77176	-5.67789	6.19566e-10	3.30822e-08
PFDN5	ENSG00000123349	5204	prefoldin subunit 5	nucleus|cytoplasm|prefoldin complex|	regulation of transcription, DNA-templated|protein folding|cellular protein metabolic process|negative regulation of transcription, DNA-templated|'de novo' posttranslational protein folding|retina development in camera-type eye|negative regulation of canonical Wnt signaling pathway|	transcription corepressor activity|protein binding|unfolded protein binding|	18	-4.02422	-5.67266	3.83756e-12	7.58773e-10
CACNB3	ENSG00000167535	784	calcium voltage-gated channel auxiliary subunit beta 3	cytosol|voltage-gated calcium channel complex|membrane|apical plasma membrane|	transport|calcium ion transport|synaptic transmission|axon guidance|regulation of ion transmembrane transport|T cell receptor signaling pathway|membrane depolarization|calcium ion transmembrane transport|	voltage-gated calcium channel activity|protein kinase binding|	20	-2.42262	-5.65775	1.25417e-10	9.82184e-09
REXO1L10P	ENSG00000255940	100288500	REX1, RNA exonuclease 1 homolog-like 10, pseudogene				18	-2.24194	-5.65339	7.50493e-10	3.83308e-08
NOLC1	ENSG00000166197	9221	nucleolar and coiled-body phosphoprotein 1	nucleolus|cytoplasm|Cajal body|	rRNA processing|nucleolus organization|cell cycle|mitotic nuclear division|	protein binding|ATP binding|GTP binding|poly(A) RNA binding|	20	-3.99111	-5.64756	9.10189e-13	3.27045e-10
BCLAF1	ENSG00000029363	9774	BCL2 associated transcription factor 1	nucleus|nucleolus|cytoplasm|	transcription, DNA-templated|apoptotic process|positive regulation of apoptotic process|regulation of DNA-templated transcription in response to stress|negative regulation of transcription, DNA-templated|negative regulation of transcription, DNA-templated|positive regulation of DNA-templated transcription, initiation|positive regulation of response to DNA damage stimulus|positive regulation of in…	DNA binding|protein binding|poly(A) RNA binding|	20	-1.92615	-5.64144	1.2468e-10	9.82184e-09
MTOR	ENSG00000198793	2475	mechanistic target of rapamycin	Golgi membrane|cytoplasm|mitochondrial outer membrane|lysosome|lysosomal membrane|endoplasmic reticulum membrane|cytosol|phosphatidylinositol 3-kinase complex|endomembrane system|membrane|PML body|TORC1 complex|TORC1 complex|TORC2 complex|mTOR-FKBP12-rapamycin complex|	positive regulation of protein phosphorylation|positive regulation of endothelial cell proliferation|regulation of glycogen biosynthetic process|protein phosphorylation|protein phosphorylation|response to stress|signal transduction|epidermal growth factor receptor signaling pathway|germ cell development|response to nutrient|insulin receptor signaling pathway|fibroblast growth factor receptor sign…	RNA polymerase III type 1 promoter DNA binding|RNA polymerase III type 2 promoter DNA binding|RNA polymerase III type 3 promoter DNA binding|TFIIIC-class transcription factor binding|protein serine/threonine kinase activity|protein serine/threonine kinase activity|protein binding|ATP binding|drug binding|kinase activity|kinase activity|protein domain specific binding|ribosome binding|phosphoprote…	20	-2.07828	-5.64003	3.62707e-07	6.21678e-06
PARG	ENSG00000227345	8505	poly(ADP-ribose) glycohydrolase	nucleus|cytoplasm|mitochondrial matrix|cytosol|	carbohydrate metabolic process|cellular response to DNA damage stimulus|detection of bacterium|	poly(ADP-ribose) glycohydrolase activity|	20	-2.40115	-5.63789	5.0723e-06	5.7488e-05
FEN1	ENSG00000168496	2237	flap structure-specific endonuclease 1	nucleus|nucleoplasm|nucleolus|mitochondrion|membrane|	mitotic cell cycle|telomere maintenance via recombination|telomere maintenance|DNA catabolic process, endonucleolytic|DNA catabolic process, endonucleolytic|DNA catabolic process, endonucleolytic|DNA catabolic process, exonucleolytic|DNA replication|DNA strand elongation involved in DNA replication|DNA repair|DNA repair|base-excision repair|double-strand break repair|memory|UV protection|telomere…	magnesium ion binding|DNA binding|damaged DNA binding|double-stranded DNA binding|endonuclease activity|RNA-DNA hybrid ribonuclease activity|exonuclease activity|protein binding|double-stranded DNA exodeoxyribonuclease activity|5'-3' exonuclease activity|5'-flap endonuclease activity|5'-flap endonuclease activity|manganese ion binding|	20	-3.53239	-5.63541	9.06181e-14	1.16215e-10
SUPV3L1	ENSG00000156502	6832	Suv3 like RNA helicase	nucleus|mitochondrion|mitochondrial matrix|mitochondrial nucleoid|mitochondrial degradosome|	mitochondrial mRNA catabolic process|positive regulation of mitochondrial RNA catabolic process|positive regulation of mitochondrial RNA catabolic process|mitochondrial RNA 3'-end processing|ATP catabolic process|DNA recombination|RNA catabolic process|positive regulation of cell growth|DNA duplex unwinding|mitochondrial ncRNA surveillance|mitochondrial mRNA surveillance|negative regulation of ap…	DNA binding|DNA helicase activity|RNA binding|double-stranded RNA binding|ATP-dependent RNA helicase activity|helicase activity|protein binding|ATP binding|3'-5' RNA helicase activity|protein homodimerization activity|poly(A) RNA binding|	20	-3.12688	-5.6344	6.41366e-11	5.7724e-09
THOC5	ENSG00000100296	8563	THO complex 5	transcription export complex|THO complex|THO complex part of transcription export complex|nucleus|cytoplasm|nuclear speck|	mRNA processing|mRNA export from nucleus|RNA splicing|monocyte differentiation|positive regulation of DNA-templated transcription, elongation|negative regulation of macrophage differentiation|viral mRNA export from host cell nucleus|primitive hemopoiesis|negative regulation of DNA damage checkpoint|	RNA binding|protein binding|	20	-2.33758	-5.63137	2.02881e-08	5.31001e-07
PPP1R8	ENSG00000117751	5511	protein phosphatase 1 regulatory subunit 8	nucleus|spliceosomal complex|cytoplasm|nuclear speck|	transcription, DNA-templated|regulation of transcription, DNA-templated|mRNA processing|RNA catabolic process|cell proliferation|RNA splicing|negative regulation of catalytic activity|negative regulation of catalytic activity|RNA phosphodiester bond hydrolysis|	DNA binding|RNA binding|endonuclease activity|protein serine/threonine phosphatase inhibitor activity|protein binding|protein phosphatase type 1 regulator activity|ribonuclease E activity|	20	-2.40606	-5.62505	3.17818e-09	1.2227e-07
ELP6	ENSG00000163832	54859	elongator acetyltransferase complex subunit 6	Elongator holoenzyme complex|	chromatin organization|transcription, DNA-templated|regulation of transcription, DNA-templated|biological_process|positive regulation of cell migration|	molecular_function|	20	-3.64065	-5.60931	4.23517e-11	4.18694e-09
SRSF6	ENSG00000124193	6431	serine and arginine rich splicing factor 6	nucleus|nucleoplasm|nuclear speck|	alternative mRNA splicing, via spliceosome|regulation of alternative mRNA splicing, via spliceosome|regulation of alternative mRNA splicing, via spliceosome|mRNA splicing, via spliceosome|transcription from RNA polymerase II promoter|termination of RNA polymerase II transcription|mRNA splice site selection|mRNA export from nucleus|RNA splicing|gene expression|regulation of keratinocyte proliferat…	nucleotide binding|RNA binding|pre-mRNA binding|poly(A) RNA binding|	18	-3.32312	-5.60763	8.23857e-07	1.24263e-05
SEPHS2	ENSG00000179918	22928	selenophosphate synthetase 2	cellular_component|	selenocysteine biosynthetic process|phosphorylation|	selenide, water dikinase activity|ATP binding|	20	-4.52867	-5.59999	8.82866e-13	3.26497e-10
GPX2	ENSG00000176153	2877	glutathione peroxidase 2	cytoplasm|cytosol|extracellular vesicular exosome|	temperature homeostasis|negative regulation of inflammatory response to antigenic stimulus|response to oxidative stress|response to symbiotic bacterium|interaction with symbiont|oxidation-reduction process|	glutathione peroxidase activity|electron carrier activity|	16	-2.48356	-5.59854	6.43509e-06	7.03387e-05
UBE2D3	ENSG00000109332	7323	ubiquitin conjugating enzyme E2 D3	nucleoplasm|cytosol|plasma membrane|endosome membrane|	negative regulation of transcription from RNA polymerase II promoter|protein polyubiquitination|toll-like receptor signaling pathway|MyD88-independent toll-like receptor signaling pathway|DNA repair|transcription, DNA-templated|transcription initiation from RNA polymerase II promoter|cellular protein modification process|ubiquitin-dependent protein catabolic process|protein monoubiquitination|apo…	ubiquitin-protein transferase activity|protein binding|ATP binding|acid-amino acid ligase activity|	20	-3.1949	-5.59788	1.54782e-11	2.00714e-09
SSBP1	ENSG00000106028	6742	single stranded DNA binding protein 1	nucleus|mitochondrion|mitochondrial nucleoid|extracellular vesicular exosome|	DNA replication|positive regulation of helicase activity|mitochondrion morphogenesis|	chromatin binding|single-stranded DNA binding|protein binding|poly(A) RNA binding|	18	-5.39569	-5.59672	1.56564e-08	4.29476e-07
NUBPL	ENSG00000151413	80224	nucleotide binding protein like	mitochondrion|	mitochondrial respiratory chain complex I assembly|mitochondrion morphogenesis|	ATP binding|metal ion binding|4 iron, 4 sulfur cluster binding|	20	-2.34436	-5.58724	8.47209e-13	3.19222e-10
DLST	ENSG00000119689	1743	dihydrolipoamide S-succinyltransferase	nucleus|mitochondrial matrix|membrane|oxoglutarate dehydrogenase complex|extracellular vesicular exosome|	generation of precursor metabolites and energy|tricarboxylic acid cycle|lysine catabolic process|L-lysine catabolic process to acetyl-CoA via saccharopine|cellular nitrogen compound metabolic process|cellular metabolic process|small molecule metabolic process|	dihydrolipoyllysine-residue succinyltransferase activity|	20	-1.91081	-5.58147	2.61328e-11	2.93187e-09
TOMM70A	ENSG00000154174						20	-3.33411	-5.57273	1.29856e-09	5.90712e-08
FBL	ENSG00000105202	2091	fibrillarin	granular component|nucleus|nucleolus|Cajal body|membrane|box C/D snoRNP complex|extracellular vesicular exosome|	osteoblast differentiation|rRNA processing|tRNA processing|snoRNA metabolic process|histone glutamine methylation|	RNA binding|protein binding|poly(A) RNA binding|histone-glutamine methyltransferase activity|	20	-3.75432	-5.55098	2.67244e-10	1.67299e-08
CABP2	ENSG00000167791	51475	calcium binding protein 2	Golgi apparatus|plasma membrane|perinuclear region of cytoplasm|	signal transduction|	calcium ion binding|	20	-2.03754	-5.54668	3.18993e-09	1.2227e-07
MRPL53	ENSG00000204822	116540	mitochondrial ribosomal protein L53	mitochondrion|ribosome|			20	-4.03123	-5.54657	4.60003e-11	4.43781e-09
USF2	ENSG00000105698	7392	upstream transcription factor 2, c-fos interacting	nucleus|	regulation of transcription from RNA polymerase II promoter by glucose|positive regulation of transcription from RNA polymerase II promoter by glucose|positive regulation of transcription from RNA polymerase II promoter by glucose|transcription, DNA-templated|transcription from RNA polymerase II promoter|lactation|late viral transcription|positive regulation of transcription from RNA polymerase I…	RNA polymerase II core promoter proximal region sequence-specific DNA binding|double-stranded DNA binding|sequence-specific DNA binding transcription factor activity|RNA polymerase II distal enhancer sequence-specific DNA binding transcription factor activity|protein binding|protein homodimerization activity|bHLH transcription factor binding|sequence-specific DNA binding|protein heterodimerizatio…	20	-2.26343	-5.54467	2.20386e-11	2.59503e-09
ELP3	ENSG00000134014	55140	elongator acetyltransferase complex subunit 3	nucleolus|cytoplasm|transcription elongation factor complex|DNA-directed RNA polymerase II, holoenzyme|Elongator holoenzyme complex|	chromatin organization|regulation of transcription from RNA polymerase II promoter|regulation of transcription from RNA polymerase II promoter|transcription elongation from RNA polymerase II promoter|histone acetylation|positive regulation of cell migration|regulation of protein kinase activity|	DNA binding|histone acetyltransferase activity|protein binding|phosphorylase kinase regulator activity|metal ion binding|iron-sulfur cluster binding|	20	-2.6781	-5.54421	1.26093e-11	1.74866e-09
LIPT1	ENSG00000144182	51601	lipoyltransferase 1	mitochondrion|	cellular protein modification process|lipid metabolic process|protein lipoylation|	transferase activity, transferring acyl groups|	20	-2.21037	-5.53285	2.91312e-11	3.16005e-09
HSPE1	ENSG00000115541	3336	heat shock protein family E (Hsp10) member 1	mitochondrion|mitochondrion|mitochondrial matrix|membrane|extracellular vesicular exosome|	osteoblast differentiation|protein folding|activation of cysteine-type endopeptidase activity involved in apoptotic process|response to unfolded protein|	protein binding|ATP binding|poly(A) RNA binding|unfolded protein binding|chaperone binding|chaperone binding|	14	-4.83888	-5.52011	6.30893e-08	1.37995e-06
CCT3	ENSG00000163468	7203	chaperonin containing TCP1 subunit 3	zona pellucida receptor complex|cytoplasm|cytosol|chaperonin-containing T-complex|cytoskeleton|microtubule|plasma membrane|cell body|extracellular vesicular exosome|	protein folding|binding of sperm to zona pellucida|cellular protein metabolic process|'de novo' posttranslational protein folding|	protein binding|ATP binding|poly(A) RNA binding|unfolded protein binding|	18	-4.58874	-5.51601	3.79282e-08	8.9319e-07
MOCS3	ENSG00000124217	27304	molybdenum cofactor synthesis 3	cytosol|cytosol|	tRNA wobble uridine modification|tRNA wobble position uridine thiolation|vitamin metabolic process|water-soluble vitamin metabolic process|Mo-molybdopterin cofactor biosynthetic process|protein adenylylation|enzyme active site formation via L-cysteine persulfide|molybdopterin cofactor biosynthetic process|protein urmylation|tRNA thio-modification|small molecule metabolic process|	thiosulfate sulfurtransferase activity|protein binding|ATP binding|nucleotidyltransferase activity|sulfurtransferase activity|sulfurtransferase activity|URM1 activating enzyme activity|metal ion binding|molybdopterin-synthase sulfurtransferase activity|molybdopterin-synthase adenylyltransferase activity|protein adenylyltransferase activity|	20	-4.67545	-5.51254	2.48737e-11	2.82232e-09
PGM3	ENSG00000013375	5238	phosphoglucomutase 3	cellular_component|cytosol|cytosol|	glucosamine metabolic process|UDP-N-acetylglucosamine biosynthetic process|UDP-N-acetylglucosamine biosynthetic process|UDP-N-acetylglucosamine biosynthetic process|dolichol-linked oligosaccharide biosynthetic process|spermatogenesis|embryo development|protein N-linked glycosylation via asparagine|glucose 1-phosphate metabolic process|hemopoiesis|post-translational protein modification|cellular p…	magnesium ion binding|phosphoacetylglucosamine mutase activity|phosphoglucomutase activity|	20	-2.2819	-5.50789	5.05122e-10	2.80983e-08
TPPP3	ENSG00000159713	51673	tubulin polymerization promoting protein family member 3	cytoplasm|microtubule|extracellular vesicular exosome|	microtubule bundle formation|	tubulin binding|	18	-2.17849	-5.50763	1.42366e-07	2.76774e-06
EIF2AK4	ENSG00000128829	440275	eukaryotic translation initiation factor 2 alpha kinase 4	cytosolic ribosome|	regulation of translational initiation|protein phosphorylation|cellular response to starvation|negative regulation of translation|endoplasmic reticulum unfolded protein response|regulation of translational initiation in response to stress|	protein serine/threonine kinase activity|eukaryotic translation initiation factor 2alpha kinase activity|ATP binding|protein homodimerization activity|	20	-2.30477	-5.50522	7.24712e-08	1.54786e-06
H2AFX	ENSG00000188486	3014	H2A histone family member X	chromosome, telomeric region|nucleosome|nuclear chromatin|condensed nuclear chromosome|male germ cell nucleus|XY body|nucleus|nucleoplasm|replication fork|site of double-strand break|	DNA damage checkpoint|double-strand break repair via homologous recombination|DNA repair|double-strand break repair|double-strand break repair|nucleosome assembly|cellular response to DNA damage stimulus|meiotic nuclear division|spermatogenesis|response to ionizing radiation|positive regulation of DNA repair|	DNA binding|damaged DNA binding|protein binding|enzyme binding|histone binding|protein heterodimerization activity|	20	-4.09252	-5.50169	3.32599e-09	1.2485e-07
PRKRIR	ENSG00000137492						20	-4.50906	-5.48422	2.3465e-11	2.70865e-09
DNAJC5	ENSG00000101152	80331	DnaJ heat shock protein family (Hsp40) member C5	mitochondrion|lysosomal membrane|plasma membrane|plasma membrane|synaptic vesicle|membrane|melanosome|clathrin-sculpted gamma-aminobutyric acid transport vesicle membrane|extracellular vesicular exosome|	synaptic transmission|neurotransmitter secretion|cell death|negative regulation of neuron apoptotic process|	glycoprotein binding|ATP-dependent protein binding|	20	-1.68551	-5.48302	5.18279e-07	8.41467e-06
RP11-127H5.1	ENSG00000253350						14	-4.0611	-5.48129	2.53091e-09	1.0252e-07
AGAP2-AS1	ENSG00000255737	100130776	AGAP2 antisense RNA 1				20	-1.7899	-5.48126	4.79273e-09	1.65877e-07
CENPK	ENSG00000123219	64105	centromere protein K	condensed chromosome kinetochore|nucleoplasm|cytosol|	mitotic cell cycle|nucleosome assembly|centromere-specific nucleosome assembly|positive regulation of transcription from RNA polymerase II promoter|		20	-2.82862	-5.47817	2.16794e-08	5.63722e-07
LSM3	ENSG00000170860	27258	LSM3 homolog, U6 small nuclear RNA and mRNA degradation associated	nucleus|cytosol|catalytic step 2 spliceosome|	nuclear-transcribed mRNA catabolic process, deadenylation-dependent decay|mRNA splicing, via spliceosome|mRNA processing|gene expression|RNA metabolic process|mRNA metabolic process|exonucleolytic nuclear-transcribed mRNA catabolic process involved in deadenylation-dependent decay|	protein binding|poly(A) RNA binding|	20	-2.01015	-5.47234	3.14348e-10	1.89653e-08
PDHB	ENSG00000168291	5162	pyruvate dehydrogenase (lipoamide) beta	nucleus|mitochondrial matrix|pyruvate dehydrogenase complex|extracellular vesicular exosome|	glucose metabolic process|acetyl-CoA biosynthetic process from pyruvate|pyruvate metabolic process|tricarboxylic acid cycle|regulation of acetyl-CoA biosynthetic process from pyruvate|cellular metabolic process|small molecule metabolic process|	pyruvate dehydrogenase activity|pyruvate dehydrogenase (acetyl-transferring) activity|protein binding|	20	-2.52847	-5.46477	1.45499e-10	1.08825e-08
ALG2	ENSG00000119523	85365	ALG2, alpha-1,3/1,6-mannosyltransferase	nucleus|cytoplasm|endoplasmic reticulum membrane|membrane|integral component of membrane|perinuclear region of cytoplasm|	dolichol-linked oligosaccharide biosynthetic process|dolichol-linked oligosaccharide biosynthetic process|protein N-linked glycosylation via asparagine|protein glycosylation in endoplasmic reticulum|post-translational protein modification|cellular protein metabolic process|response to calcium ion|mannosylation|mannosylation|	alpha-1,3-mannosyltransferase activity|GDP-Man:Man1GlcNAc2-PP-Dol alpha-1,3-mannosyltransferase activity|protein binding|glycolipid 6-alpha-mannosyltransferase activity|protein anchor|protein heterodimerization activity|protein N-terminus binding|calcium-dependent protein binding|calcium-dependent protein binding|	20	-4.02074	-5.46091	8.02852e-09	2.50515e-07
MCM7	ENSG00000166508	4176	minichromosome maintenance complex component 7	chromatin|nucleus|nucleoplasm|cytoplasm|cytosol|membrane|MCM complex|MCM complex|	G1/S transition of mitotic cell cycle|mitotic cell cycle|DNA replication|DNA unwinding involved in DNA replication|DNA replication initiation|DNA strand elongation involved in DNA replication|cellular response to DNA damage stimulus|cell proliferation|regulation of phosphorylation|response to drug|cellular response to epidermal growth factor stimulus|	DNA binding|single-stranded DNA binding|ATP-dependent DNA helicase activity|protein binding|ATP binding|	20	-3.11838	-5.45901	1.29e-12	3.96329e-10
NSMCE2	ENSG00000156831	286053	NSE2/MMS21 homolog, SMC5-SMC6 complex SUMO ligase	chromosome, telomeric region|nucleus|PML body|Smc5-Smc6 complex|	telomere maintenance via recombination|double-strand break repair via homologous recombination|mitotic nuclear division|protein sumoylation|positive regulation of maintenance of mitotic sister chromatid cohesion|positive regulation of mitotic metaphase/anaphase transition|cellular senescence|	protein binding|zinc ion binding|SUMO ligase activity|	20	-2.6791	-5.45349	2.46946e-09	1.00438e-07
NOC4L	ENSG00000184967	79050	nucleolar complex associated 4 homolog	nucleus|nucleolus|nucleolus|integral component of membrane|nuclear membrane|	rRNA processing|	protein binding|poly(A) RNA binding|	20	-2.07901	-5.45258	2.25488e-11	2.61957e-09
MRPS6	ENSG00000243927	64968	mitochondrial ribosomal protein S6	mitochondrion|small ribosomal subunit|	translation|	structural constituent of ribosome|rRNA binding|	18	-2.45213	-5.44779	6.24356e-10	3.31606e-08
SRSF10	ENSG00000188529	10772	serine and arginine rich splicing factor 10	nucleus|nucleoplasm|cytoplasm|nuclear speck|	spliceosomal tri-snRNP complex assembly|RNA splicing, via transesterification reactions|mRNA splicing, via spliceosome|regulation of transcription, DNA-templated|mRNA splice site selection|mRNA export from nucleus|cytoplasmic transport|negative regulation of mRNA splicing, via spliceosome|	nucleotide binding|RNA binding|protein binding|poly(A) RNA binding|RS domain binding|unfolded protein binding|	14	-2.38734	-5.44217	1.76999e-08	4.75089e-07
IPO9	ENSG00000198700	55705	importin 9	nucleus|cytoplasm|membrane|	protein import into nucleus|	protein binding|Ran GTPase binding|protein transporter activity|histone binding|	18	-2.35904	-5.43838	1.61116e-06	2.15794e-05
HYPK	ENSG00000242028	25764	huntingtin interacting protein K	nucleus|cytoplasm|			18	-2.9753	-5.43432	4.37802e-09	1.53924e-07
EBI3	ENSG00000105246	10148	Epstein-Barr virus induced 3	extracellular space|plasma membrane|	humoral immune response|cytokine-mediated signaling pathway|cytokine-mediated signaling pathway|T-helper 1 type immune response|positive regulation of interferon-gamma biosynthetic process|positive regulation of alpha-beta T cell proliferation|	cytokine receptor activity|cytokine activity|protein binding|interleukin-27 receptor binding|	20	-2.05018	-5.43138	4.06696e-08	9.46588e-07
C17orf70	ENSG00000185504						20	-1.65448	-5.42823	1.18492e-07	2.36728e-06
MLST8	ENSG00000167965	64223	MTOR associated protein, LST8 homolog	cytoplasm|cytosol|	epidermal growth factor receptor signaling pathway|insulin receptor signaling pathway|fibroblast growth factor receptor signaling pathway|positive regulation of actin filament polymerization|T cell costimulation|positive regulation of TOR signaling|regulation of Rac GTPase activity|regulation of actin cytoskeleton organization|Fc-epsilon receptor signaling pathway|innate immune response|neurotrop…	protein binding|	20	-1.69995	-5.42233	2.9097e-09	1.13935e-07
AC002451.1	ENSG00000269449						10	-4.48023	-5.42007	0.000920291	0.00468832
DDX49	ENSG00000105671	54555	DEAD-box helicase 49		ATP catabolic process|	ATP binding|ATP-dependent helicase activity|poly(A) RNA binding|	20	-4.69487	-5.41137	1.45344e-12	4.34699e-10
DAZAP1	ENSG00000071626	26528	DAZ associated protein 1	nucleus|cytoplasm|	maternal placenta development|spermatogenesis|cell proliferation|cell differentiation|	nucleotide binding|RNA binding|RNA stem-loop binding|poly(A) RNA binding|	20	-1.76817	-5.41077	2.77098e-10	1.70792e-08
SPIDR	ENSG00000164808	23514	scaffolding protein involved in DNA repair	nuclear chromosome|	double-strand break repair via homologous recombination|cellular response to DNA damage stimulus|regulation of double-strand break repair via homologous recombination|positive regulation of protein complex assembly|regulation of establishment of protein localization to chromosome|cellular response to ionizing radiation|cellular response to hydroxyurea|cellular response to camptothecin|positive re…	protein binding|	20	-1.84981	-5.40591	2.36257e-12	5.6844e-10
TMEM147	ENSG00000105677	10430	transmembrane protein 147	endoplasmic reticulum membrane|integral component of membrane|			18	-1.84941	-5.40386	4.75108e-09	1.65294e-07
TCOF1	ENSG00000070814	6949	treacle ribosome biogenesis factor 1	nucleus|nucleolus|cytoplasm|	skeletal system development|transport|transcription of nuclear large rRNA transcript from RNA polymerase I promoter|	transporter activity|protein binding|poly(A) RNA binding|	20	-3.16449	-5.39752	1.81454e-08	4.84444e-07
DPH1	ENSG00000108963	1801	diphthamide biosynthesis 1	nucleus|cytoplasm|	translation|cell proliferation|peptidyl-diphthamide biosynthetic process from peptidyl-histidine|		20	-2.64925	-5.38856	9.05677e-11	7.63138e-09
CLPX	ENSG00000166855	10845	caseinolytic mitochondrial matrix peptidase chaperone subunit	mitochondrion|mitochondrial inner membrane|mitochondrial matrix|endopeptidase Clp complex|mitochondrial endopeptidase Clp complex|mitochondrial nucleoid|	ATP catabolic process|protein folding|positive regulation of peptidase activity|proteolysis involved in cellular protein catabolic process|	ATP-dependent peptidase activity|protein binding|ATP binding|peptidase activator activity|ATPase activity|ATPase activity|metal ion binding|unfolded protein binding|	18	-3.38743	-5.38251	5.62406e-10	3.06865e-08
SCD	ENSG00000099194	6319	stearoyl-CoA desaturase	endoplasmic reticulum|endoplasmic reticulum membrane|membrane|integral component of membrane|	fatty acid biosynthetic process|oxidation-reduction process|	stearoyl-CoA 9-desaturase activity|iron ion binding|	20	-2.78034	-5.38145	3.16557e-11	3.37102e-09
PAICS	ENSG00000128050	10606	phosphoribosylaminoimidazole carboxylase and phosphoribosylaminoimidazolesuccinocarboxamide synthase	cytosol|membrane|extracellular vesicular exosome|	purine nucleobase metabolic process|'de novo' IMP biosynthetic process|purine nucleobase biosynthetic process|purine ribonucleoside monophosphate biosynthetic process|small molecule metabolic process|nucleobase-containing small molecule metabolic process|	phosphoribosylaminoimidazole carboxylase activity|phosphoribosylaminoimidazolesuccinocarboxamide synthase activity|protein binding|ATP binding|identical protein binding|	20	-2.89783	-5.3756	3.32872e-10	1.99026e-08
RPL18A	ENSG00000105640	6142	ribosomal protein L18a	cytosol|membrane|cytosolic large ribosomal subunit|	nuclear-transcribed mRNA catabolic process, nonsense-mediated decay|translation|translation|translational initiation|translational elongation|translational termination|SRP-dependent cotranslational protein targeting to membrane|gene expression|viral process|RNA metabolic process|mRNA metabolic process|viral life cycle|viral transcription|cellular protein metabolic process|	RNA binding|structural constituent of ribosome|poly(A) RNA binding|	16	-3.07709	-5.37108	3.58528e-10	2.10582e-08
CCP110	ENSG00000103540	9738	centriolar coiled-coil protein 110	centrosome|centriole|cytosol|protein complex|	G2/M transition of mitotic cell cycle|mitotic cell cycle|centriole replication|cell projection organization|regulation of cytokinesis|centrosome duplication|centrosome duplication|	protein binding|	20	-1.64867	-5.36862	8.04126e-07	1.21655e-05
PGD	ENSG00000142657	5226	phosphogluconate dehydrogenase	nucleus|cytosol|extracellular vesicular exosome|	carbohydrate metabolic process|pentose-phosphate shunt|pentose-phosphate shunt|pentose-phosphate shunt, oxidative branch|pentose biosynthetic process|D-gluconate metabolic process|small molecule metabolic process|oxidation-reduction process|	phosphogluconate dehydrogenase (decarboxylating) activity|phosphogluconate dehydrogenase (decarboxylating) activity|NADP binding|	18	-2.42632	-5.36724	4.85218e-09	1.67065e-07
NDUFB4	ENSG00000065518	4710	NADH:ubiquinone oxidoreductase subunit B4	nucleus|mitochondrion|mitochondrial inner membrane|mitochondrial respiratory chain complex I|mitochondrial respiratory chain complex I|integral component of membrane|nuclear membrane|extracellular vesicular exosome|	mitochondrial electron transport, NADH to ubiquinone|response to oxidative stress|respiratory electron transport chain|cellular metabolic process|small molecule metabolic process|	NADH dehydrogenase (ubiquinone) activity|	20	-3.39834	-5.3631	1.38243e-10	1.05607e-08
CYB5B	ENSG00000103018	80777	cytochrome b5 type B	mitochondrial outer membrane|membrane|integral component of membrane|	oxidation-reduction process|	heme binding|metal ion binding|	20	-1.70102	-5.36303	3.55003e-11	3.63559e-09
TFAP2C	ENSG00000087510	7022	transcription factor AP-2 gamma	nucleus|	negative regulation of transcription from RNA polymerase II promoter|trophectodermal cell differentiation|hair follicle development|keratinocyte development|regulation of transcription from RNA polymerase II promoter|transcription from RNA polymerase II promoter|cell-cell signaling|male gonad development|forebrain neuron fate commitment|cerebral cortex development|germ-line stem cell maintenance|…	RNA polymerase II distal enhancer sequence-specific DNA binding|RNA polymerase II core promoter proximal region sequence-specific DNA binding transcription factor activity involved in positive regulation of transcription|RNA polymerase II core promoter proximal region sequence-specific DNA binding transcription factor activity involved in negative regulation of transcription|DNA binding|sequence-…	18	-1.8228	-5.36211	3.51128e-10	2.07245e-08
CCT5	ENSG00000150753	22948	chaperonin containing TCP1 subunit 5	zona pellucida receptor complex|nucleolus|cytoplasm|centrosome|cytosol|chaperonin-containing T-complex|microtubule|cell body|extracellular vesicular exosome|	protein folding|binding of sperm to zona pellucida|response to virus|cellular protein metabolic process|'de novo' posttranslational protein folding|	ATP binding|G-protein beta-subunit binding|unfolded protein binding|	18	-3.21294	-5.35998	1.00538e-07	2.0529e-06
NDUFS1	ENSG00000023228	4719	NADH:ubiquinone oxidoreductase core subunit S1	mitochondrial inner membrane|mitochondrial respiratory chain complex I|mitochondrial respiratory chain complex I|mitochondrial respiratory chain complex I|mitochondrial intermembrane space|	mitochondrial electron transport, NADH to ubiquinone|apoptotic mitochondrial changes|respiratory electron transport chain|cellular metabolic process|small molecule metabolic process|cellular respiration|ATP metabolic process|regulation of mitochondrial membrane potential|reactive oxygen species metabolic process|	protein binding|NADH dehydrogenase (ubiquinone) activity|NADH dehydrogenase (ubiquinone) activity|electron carrier activity|metal ion binding|2 iron, 2 sulfur cluster binding|4 iron, 4 sulfur cluster binding|	20	-3.74463	-5.34983	6.35752e-13	2.72941e-10
C11orf73	ENSG00000149196						20	-1.63493	-5.34827	6.94544e-10	3.60261e-08
MRPL45	ENSG00000174100	84311	mitochondrial ribosomal protein L45	mitochondrion|ribosome|		poly(A) RNA binding|	20	-3.58904	-5.34671	3.88382e-12	7.59346e-10
HIST1H3B	ENSG00000124693	8358	histone cluster 1 H3 family member b				20	-1.92467	-5.34599	9.84029e-10	4.75007e-08
TOMM20	ENSG00000173726	9804	translocase of outer mitochondrial membrane 20	mitochondrion|mitochondrial outer membrane translocase complex|mitochondrial outer membrane translocase complex|integral component of membrane|	protein targeting to mitochondrion|protein targeting to mitochondrion|cellular protein metabolic process|protein transmembrane transport|	protein binding|P-P-bond-hydrolysis-driven protein transmembrane transporter activity|unfolded protein binding|	20	-3.81556	-5.34402	1.45011e-13	1.25907e-10
CPOX	ENSG00000080819	1371	coproporphyrinogen oxidase	mitochondrion|mitochondrial inner membrane|mitochondrial intermembrane space|	porphyrin-containing compound metabolic process|protoporphyrinogen IX biosynthetic process|heme biosynthetic process|response to iron ion|response to lead ion|response to insecticide|small molecule metabolic process|response to arsenic-containing substance|response to methylmercury|oxidation-reduction process|	coproporphyrinogen oxidase activity|structural constituent of eye lens|protein homodimerization activity|	18	-1.93514	-5.33867	1.33343e-07	2.61064e-06
TUFM	ENSG00000178952	7284	Tu translation elongation factor, mitochondrial	mitochondrion|membrane|mitochondrial nucleoid|extracellular vesicular exosome|	GTP catabolic process|translational elongation|	translation elongation factor activity|GTPase activity|GTP binding|poly(A) RNA binding|	20	-3.96342	-5.33338	3.61867e-10	2.1192e-08
HMBS	ENSG00000256269	3145	hydroxymethylbilane synthase	cytosol|	porphyrin-containing compound metabolic process|protoporphyrinogen IX biosynthetic process|heme biosynthetic process|heme biosynthetic process|peptidyl-pyrromethane cofactor linkage|small molecule metabolic process|	hydroxymethylbilane synthase activity|hydroxymethylbilane synthase activity|	20	-1.87336	-5.32474	1.34716e-08	3.79982e-07
RBM12	ENSG00000244462	10137	RNA binding motif protein 12	nucleus|		nucleotide binding|poly(A) RNA binding|	20	-2.0368	-5.31845	4.4503e-08	1.01918e-06
LIAS	ENSG00000121897	11019	lipoic acid synthetase	mitochondrion|	neural tube closure|inflammatory response|response to oxidative stress|lipoate biosynthetic process|protein lipoylation|response to lipopolysaccharide|	lipoate synthase activity|metal ion binding|4 iron, 4 sulfur cluster binding|	18	-3.77201	-5.3143	5.70064e-07	9.12194e-06
MFAP1	ENSG00000140259	4236	microfibrillar associated protein 1	microfibril|extracellular region|	biological_process|extracellular matrix organization|	protein binding|poly(A) RNA binding|	20	-2.84252	-5.30581	5.22739e-11	4.92411e-09
CPSF4	ENSG00000160917	10898	cleavage and polyadenylation specific factor 4	nucleoplasm|mRNA cleavage and polyadenylation specificity factor complex|	mRNA processing|modulation by virus of host morphology or physiology|modulation by virus of host process|viral life cycle|modification by virus of host mRNA processing|	zinc ion binding|poly(A) RNA binding|	20	-3.29932	-5.30387	2.73962e-10	1.6973e-08
WDR24	ENSG00000127580	84219	WD repeat domain 24				20	-3.96758	-5.2987	1.9404e-12	5.09867e-10
ATMIN	ENSG00000166454	23300	ATM interactor	nucleus|	transcription, DNA-templated|cellular response to DNA damage stimulus|positive regulation of transcription, DNA-templated|	protein binding|transcription regulatory region DNA binding|dynein binding|metal ion binding|	20	-1.87354	-5.29801	4.77015e-11	4.5798e-09
PRPF3	ENSG00000117360	9129	pre-mRNA processing factor 3	nucleus|spliceosomal complex|cytoplasm|Cajal body|nuclear speck|U4/U6 x U5 tri-snRNP complex|	RNA splicing, via transesterification reactions|mRNA splicing, via spliceosome|mRNA processing|RNA splicing|	protein binding|identical protein binding|poly(A) RNA binding|	20	-3.19574	-5.29391	2.43482e-13	1.62078e-10
IKBKAP	ENSG00000070061	8518	inhibitor of kappa light polypeptide gene enhancer in B-cells, kinase complex-associated protein	nucleolus|cytoplasm|transcription elongation factor complex|DNA-directed RNA polymerase II, holoenzyme|Elongator holoenzyme complex|	chromatin organization|regulation of transcription from RNA polymerase II promoter|regulation of transcription from RNA polymerase II promoter|transcription elongation from RNA polymerase II promoter|protein complex assembly|protein phosphorylation|immune response|signal transduction|positive regulation of cell migration|regulation of protein kinase activity|regulation of protein kinase activity|	DNA binding|signal transducer activity|protein binding|phosphorylase kinase regulator activity|	20	-2.69518	-5.29349	1.28624e-12	3.96329e-10
MARS2	ENSG00000247626	92935	methionyl-tRNA synthetase 2, mitochondrial	mitochondrial matrix|mitochondrial matrix|	tRNA aminoacylation for protein translation|methionyl-tRNA aminoacylation|cell death|gene expression|	methionine-tRNA ligase activity|ATP binding|	20	-3.181	-5.28923	1.03891e-13	1.22041e-10
RTEL1	ENSG00000258366	51750	regulator of telomere elongation helicase 1	nucleus|	telomere maintenance|telomere maintenance|ATP catabolic process|DNA repair|regulation of double-strand break repair via homologous recombination|DNA duplex unwinding|DNA duplex unwinding|small molecule metabolic process|	DNA binding|ATP-dependent DNA helicase activity|protein binding|ATP binding|metal ion binding|4 iron, 4 sulfur cluster binding|	20	-2.32675	-5.28819	4.07818e-12	7.81513e-10
DNAJC11	ENSG00000007923	55735	DnaJ heat shock protein family (Hsp40) member C11	mitochondrial inner membrane|extracellular vesicular exosome|		protein binding|	20	-4.36772	-5.28819	1.40379e-09	6.25751e-08
SUMO2	ENSG00000188612	6613	small ubiquitin-like modifier 2	nucleoplasm|PML body|	protein sumoylation|protein sumoylation|positive regulation of proteasomal ubiquitin-dependent protein catabolic process|post-translational protein modification|cellular protein metabolic process|	protein binding|ubiquitin protein ligase binding|poly(A) RNA binding|	20	-2.26077	-5.28609	3.66485e-06	4.35119e-05
MRPL36	ENSG00000171421	64979	mitochondrial ribosomal protein L36	mitochondrial large ribosomal subunit|	translation|	structural constituent of ribosome|	20	-3.19792	-5.28479	5.18437e-12	9.41198e-10
SF3A2	ENSG00000104897	8175	splicing factor 3a subunit 2	nucleoplasm|spliceosomal complex|small nuclear ribonucleoprotein complex|catalytic step 2 spliceosome|	mRNA 3'-splice site recognition|mRNA splicing, via spliceosome|mRNA splicing, via spliceosome|mRNA processing|RNA splicing|gene expression|	protein binding|zinc ion binding|poly(A) RNA binding|	20	-2.83706	-5.28332	5.62128e-09	1.87407e-07
COQ4	ENSG00000167113	51117	coenzyme Q4	mitochondrion|mitochondrial inner membrane|	ubiquinone biosynthetic process|		20	-3.20425	-5.28268	2.63706e-07	4.71038e-06
ZNF259	ENSG00000109917						20	-2.46571	-5.27077	1.13842e-08	3.32859e-07
P2RY6	ENSG00000171631	5031	pyrimidinergic receptor P2Y6	plasma membrane|integral component of plasma membrane|basolateral plasma membrane|apical plasma membrane|	phospholipase C-activating G-protein coupled receptor signaling pathway|positive regulation of smooth muscle cell migration|transepithelial chloride transport|G-protein coupled purinergic nucleotide receptor signaling pathway|	G-protein coupled receptor activity|G-protein coupled purinergic nucleotide receptor activity|UDP-activated nucleotide receptor activity|	20	-1.76418	-5.26651	2.33643e-07	4.2225e-06
OXSM	ENSG00000151093	54995	3-oxoacyl-ACP synthase, mitochondrial	mitochondrion|mitochondrion|	acyl-CoA metabolic process|short-chain fatty acid biosynthetic process|medium-chain fatty acid biosynthetic process|	3-oxoacyl-[acyl-carrier-protein] synthase activity|	20	-6.9101	-5.26183	1.88453e-10	1.30222e-08
PPP6C	ENSG00000119414	5537	protein phosphatase 6 catalytic subunit	cytosol|	G1/S transition of mitotic cell cycle|protein dephosphorylation|	protein serine/threonine phosphatase activity|protein binding|metal ion binding|	20	-3.76532	-5.25148	3.78452e-08	8.9319e-07
AASDHPPT	ENSG00000149313	60496	aminoadipate-semialdehyde dehydrogenase-phosphopantetheinyl transferase	cytosol|extracellular vesicular exosome|	vitamin metabolic process|water-soluble vitamin metabolic process|macromolecule biosynthetic process|pantothenate metabolic process|small molecule metabolic process|	magnesium ion binding|protein binding|holo-[acyl-carrier-protein] synthase activity|	20	-4.47651	-5.24464	6.43715e-08	1.40032e-06
WRB	ENSG00000182093	7485	tryptophan rich basic protein	nucleus|endoplasmic reticulum membrane|integral component of membrane|	tail-anchored membrane protein insertion into ER membrane|		20	-3.05019	-5.24328	3.54294e-12	7.21964e-10
PPAN	ENSG00000130810	56342	peter pan homolog (Drosophila)	nucleus|nucleolus|	RNA splicing|	poly(A) RNA binding|	20	-2.90993	-5.23816	1.22616e-11	1.73836e-09
HARS2	ENSG00000112855	23438	histidyl-tRNA synthetase 2, mitochondrial	mitochondrial matrix|	translation|tRNA aminoacylation for protein translation|histidyl-tRNA aminoacylation|gene expression|	histidine-tRNA ligase activity|ATP binding|poly(A) RNA binding|	20	-2.73789	-5.22805	3.81468e-09	1.39193e-07
MRPL47	ENSG00000136522	57129	mitochondrial ribosomal protein L47	cellular_component|mitochondrion|mitochondrial ribosome|	translation|biological_process|	molecular_function|structural constituent of ribosome|	20	-3.92068	-5.22751	5.42954e-10	2.97879e-08
AURKAIP1	ENSG00000175756	54998	aurora kinase A interacting protein 1	nucleus|mitochondrion|intracellular membrane-bounded organelle|	negative regulation of mitosis|positive regulation of proteolysis|	protein binding|	20	-1.57614	-5.22417	6.00137e-10	3.23912e-08
REXO2	ENSG00000076043	25996	RNA exonuclease 2	nucleus|nucleolus|mitochondrion|mitochondrial intermembrane space|mitochondrial matrix|focal adhesion|	nucleobase-containing compound metabolic process|nucleotide metabolic process|nucleic acid phosphodiester bond hydrolysis|nucleic acid phosphodiester bond hydrolysis|	nucleic acid binding|3'-5' exonuclease activity|	20	-1.52116	-5.21715	1.48387e-07	2.85206e-06
IPO13	ENSG00000117408	9670	importin 13	nucleus|cytoplasm|	protein import into nucleus|	protein binding|Ran GTPase binding|	20	-3.15924	-5.21059	2.20511e-10	1.44856e-08
DIS3	ENSG00000083520	22894	DIS3 homolog, exosome endoribonuclease and 3'-5' exoribonuclease	nuclear exosome (RNase complex)|exosome (RNase complex)|nucleus|nucleoplasm|cytoplasm|cytosol|membrane|	nuclear-transcribed mRNA catabolic process, deadenylation-dependent decay|rRNA processing|gene expression|RNA metabolic process|mRNA metabolic process|rRNA catabolic process|positive regulation of GTPase activity|exonucleolytic nuclear-transcribed mRNA catabolic process involved in deadenylation-dependent decay|CUT catabolic process|nucleic acid phosphodiester bond hydrolysis|RNA phosphodiester b…	3'-5'-exoribonuclease activity|RNA binding|endonuclease activity|guanyl-nucleotide exchange factor activity|protein binding|	18	-3.74439	-5.2083	1.38553e-10	1.05607e-08
DPY30	ENSG00000162961	84661	dpy-30, histone methyltransferase complex regulatory subunit	nucleus|Golgi apparatus|trans-Golgi network|histone methyltransferase complex|Set1C/COMPASS complex|	transcription, DNA-templated|regulation of transcription, DNA-templated|endosomal transport|histone H3-K4 methylation|	protein binding|identical protein binding|protein homodimerization activity|	20	-1.96977	-5.20443	9.61016e-07	1.40886e-05
MIF4GD	ENSG00000125457	57409	MIF4G domain containing	nucleolus|cytoplasm|	regulation of translation|	RNA binding|protein binding|protein C-terminus binding|	20	-1.82787	-5.19805	5.11715e-11	4.86616e-09
XRCC1	ENSG00000073050	7515	X-ray repair cross complementing 1	nucleus|nucleoplasm|	single strand break repair|response to hypoxia|DNA repair|base-excision repair|base-excision repair|response to organic substance|hippocampus development|response to drug|	damaged DNA binding|protein binding|	14	-1.73899	-5.18619	1.63701e-07	3.08989e-06
PCBP1	ENSG00000169564	5093	poly(rC) binding protein 1	nucleoplasm|cytoplasm|membrane|ribonucleoprotein complex|extracellular vesicular exosome|	mRNA splicing, via spliceosome|RNA splicing|gene expression|	single-stranded DNA binding|RNA binding|protein binding|poly(A) RNA binding|	18	-2.45391	-5.18187	2.01994e-07	3.70755e-06
PRPS2	ENSG00000101911	5634	phosphoribosyl pyrophosphate synthetase 2	ribose phosphate diphosphokinase complex|extracellular vesicular exosome|	5-phosphoribose 1-diphosphate biosynthetic process|nucleobase-containing compound metabolic process|AMP biosynthetic process|phosphorylation|organ regeneration|	magnesium ion binding|ribose phosphate diphosphokinase activity|ATP binding|AMP binding|kinase activity|GDP binding|carbohydrate binding|protein homodimerization activity|ADP binding|	20	-3.20424	-5.17947	1.23051e-13	1.25907e-10
MPV17L2	ENSG00000254858	84769	MPV17 mitochondrial inner membrane protein like 2	mitochondrion|integral component of membrane|			18	-1.69387	-5.17718	6.83675e-10	3.57408e-08
PWP2	ENSG00000241945	5822	PWP2 periodic tryptophan protein homolog (yeast)	nucleolus|cytoplasm|	signal transduction|	signal transducer activity|poly(A) RNA binding|	20	-3.28799	-5.17568	6.67681e-10	3.49963e-08
COASY	ENSG00000068120	80347	Coenzyme A synthase	nucleus|cytoplasm|mitochondrial outer membrane|mitochondrial matrix|extracellular vesicular exosome|	vitamin metabolic process|water-soluble vitamin metabolic process|cell death|coenzyme biosynthetic process|coenzyme A biosynthetic process|coenzyme A biosynthetic process|coenzyme A biosynthetic process|pantothenate metabolic process|phosphorylation|small molecule metabolic process|	dephospho-CoA kinase activity|pantetheine-phosphate adenylyltransferase activity|protein binding|ATP binding|	20	-3.5449	-5.17164	1.21949e-08	3.52159e-07
TMEM203	ENSG00000187713	94107	transmembrane protein 203	integral component of membrane|			18	-1.69813	-5.16944	4.64438e-08	1.05756e-06
SMU1	ENSG00000122692	55234	DNA replication regulator and spliceosomal factor	nucleus|cytoplasm|		protein binding|	16	-3.28673	-5.16723	1.89371e-06	2.47658e-05
NDNL2	ENSG00000185115						18	-4.22704	-5.15627	1.07388e-09	5.09393e-08
CCAR1	ENSG00000060339	55749	cell division cycle and apoptosis regulator 1	nucleoplasm|perinuclear region of cytoplasm|	mRNA splicing, via spliceosome|transcription, DNA-templated|regulation of transcription, DNA-templated|apoptotic process|cell cycle|RNA splicing|gene expression|	protein binding|ligand-dependent nuclear receptor transcription coactivator activity|poly(A) RNA binding|	18	-1.892	-5.1424	1.40243e-09	6.25751e-08
DDX5	ENSG00000108654	1655	DEAD-box helicase 5	nucleus|nucleus|nucleolus|membrane|ribonucleoprotein complex|extracellular vesicular exosome|catalytic step 2 spliceosome|	negative regulation of transcription from RNA polymerase II promoter|regulation of alternative mRNA splicing, via spliceosome|mRNA splicing, via spliceosome|in utero embryonic development|ATP catabolic process|transcription, DNA-templated|circadian rhythm|cell growth|positive regulation of intracellular estrogen receptor signaling pathway|positive regulation of DNA damage response, signal transdu…	transcription coactivator activity|RNA helicase activity|RNA helicase activity|ATP-dependent RNA helicase activity|protein binding|calmodulin binding|ATP binding|enzyme binding|estrogen receptor binding|pre-mRNA binding|poly(A) RNA binding|calcium-dependent protein binding|androgen receptor binding|	20	-2.9791	-5.14168	1.27081e-13	1.25907e-10
PUF60	ENSG00000179950	22827	poly(U) binding splicing factor 60	cyclin-dependent protein kinase activating kinase holoenzyme complex|ribonucleoprotein complex|	transcription, DNA-templated|regulation of transcription, DNA-templated|mRNA processing|apoptotic process|RNA splicing|	nucleotide binding|DNA binding|protein binding|identical protein binding|poly(A) RNA binding|	20	-3.93734	-5.13423	1.79345e-10	1.27004e-08
URB1	ENSG00000142207	9875	URB1 ribosome biogenesis 1 homolog (S. cerevisiae)	nucleolus|nucleolus|	biological_process|	poly(A) RNA binding|	20	-2.18552	-5.13291	1.25967e-11	1.74866e-09
GPIHBP1	ENSG00000182851	338328	glycosylphosphatidylinositol anchored high density lipoprotein binding protein 1	external side of plasma membrane|basolateral plasma membrane|apical plasma membrane|anchored component of external side of plasma membrane|high-density lipoprotein particle|	lipid transport|intracellular protein transport|protein import|protein localization to cell surface|cholesterol homeostasis|transcytosis|protein stabilization|positive regulation of lipoprotein lipase activity|triglyceride homeostasis|response to heparin|protein transmembrane transport|protein transmembrane transport|positive regulation of chylomicron remnant clearance|	high-density lipoprotein particle binding|lipid binding|protein transmembrane transporter activity|lipase binding|chylomicron binding|lipoprotein particle binding|	20	-2.01861	-5.1291	5.65541e-09	1.88231e-07
RPN1	ENSG00000163902	6184	ribophorin I	endoplasmic reticulum membrane|endoplasmic reticulum membrane|rough endoplasmic reticulum|oligosaccharyltransferase complex|membrane|integral component of membrane|melanosome|	translation|cellular protein modification process|SRP-dependent cotranslational protein targeting to membrane|gene expression|protein N-linked glycosylation via asparagine|protein N-linked glycosylation via asparagine|post-translational protein modification|cellular protein metabolic process|	dolichyl-diphosphooligosaccharide-protein glycotransferase activity|protein binding|poly(A) RNA binding|	20	-1.86658	-5.12871	1.43559e-08	3.99286e-07
WDR3	ENSG00000065183	10885	WD repeat domain 3	nucleus|nucleolus|nuclear membrane|		poly(A) RNA binding|	20	-4.02582	-5.12782	2.55456e-08	6.46433e-07
C19orf40	ENSG00000131944						20	-3.41497	-5.11639	1.11851e-09	5.29305e-08
METTL16	ENSG00000127804	79066	methyltransferase like 16		methylation|	methyltransferase activity|poly(A) RNA binding|	20	-2.87909	-5.11168	1.79296e-05	0.000168655
POLR2A	ENSG00000181222	5430	RNA polymerase II subunit A	nucleus|nucleus|nucleoplasm|DNA-directed RNA polymerase II, core complex|	mRNA splicing, via spliceosome|transcription, RNA-templated|DNA repair|transcription-coupled nucleotide-excision repair|nucleotide-excision repair|regulation of transcription, DNA-templated|transcription from RNA polymerase II promoter|transcription from RNA polymerase II promoter|transcription from RNA polymerase II promoter|transcription initiation from RNA polymerase II promoter|transcription …	RNA polymerase II activity|DNA binding|DNA-directed RNA polymerase activity|RNA-directed RNA polymerase activity|protein binding|protein binding|ubiquitin protein ligase binding|poly(A) RNA binding|metal ion binding|	18	-1.96152	-5.11168	6.52344e-07	1.02335e-05
CWC25	ENSG00000108296	54883	CWC25 spliceosome associated protein homolog				20	-1.51808	-5.10709	1.24915e-08	3.57386e-07
PGK1	ENSG00000102144	5230	phosphoglycerate kinase 1	cytosol|membrane|extracellular vesicular exosome|	carbohydrate metabolic process|glucose metabolic process|gluconeogenesis|glycolytic process|glycolytic process|phosphorylation|epithelial cell differentiation|small molecule metabolic process|	phosphoglycerate kinase activity|phosphoglycerate kinase activity|protein binding|ATP binding|	18	-3.75658	-5.10508	4.23232e-10	2.43572e-08
CCDC130	ENSG00000104957	81576	coiled-coil domain containing 130	cellular_component|	response to virus|	protein binding|	20	-2.12837	-5.1022	6.39838e-09	2.08104e-07
P2RX5	ENSG00000083454	5026	purinergic receptor P2X 5	integral component of nuclear inner membrane|integral component of plasma membrane|	transport|cation transport|signal transduction|nervous system development|positive regulation of calcium ion transport into cytosol|ion transmembrane transport|ion transmembrane transport|purinergic nucleotide receptor signaling pathway|purinergic nucleotide receptor signaling pathway|positive regulation of calcium-mediated signaling|	purinergic nucleotide receptor activity|transmembrane signaling receptor activity|extracellular ATP-gated cation channel activity|ion channel activity|ATP binding|	20	-1.39136	-5.10018	1.71706e-09	7.39003e-08
MIPEP	ENSG00000027001	4285	mitochondrial intermediate peptidase	mitochondrion|mitochondrial matrix|	proteolysis|protein processing involved in protein targeting to mitochondrion|	metalloendopeptidase activity|metal ion binding|	20	-2.31628	-5.09931	3.87694e-06	4.5677e-05
ROMO1	ENSG00000125995	140823	reactive oxygen species modulator 1	mitochondrion|mitochondrial inner membrane|integral component of membrane|	replicative cell aging|positive regulation of cell proliferation|cellular response to reactive oxygen species|defense response to bacterium|positive regulation of reactive oxygen species metabolic process|	molecular_function|	20	-3.5398	-5.09915	1.54389e-12	4.34699e-10
VPS25	ENSG00000131475	84313	vacuolar protein sorting 25 homolog	nucleus|nucleoplasm|nucleolus|mitochondrion|cytosol|endosome membrane|extracellular vesicular exosome|	transcription, DNA-templated|regulation of transcription, DNA-templated|protein transport|endosomal transport|membrane organization|	protein binding|protein homodimerization activity|	18	-2.11812	-5.09446	3.91707e-11	3.93085e-09
FECH	ENSG00000066926	2235	ferrochelatase	mitochondrial inner membrane|mitochondrial matrix|	generation of precursor metabolites and energy|porphyrin-containing compound metabolic process|heme biosynthetic process|cholesterol metabolic process|response to light stimulus|detection of UV|response to lead ion|regulation of eIF2 alpha phosphorylation by heme|response to insecticide|erythrocyte differentiation|very-low-density lipoprotein particle assembly|response to drug|small molecule meta…	ferrochelatase activity|ferrochelatase activity|protein binding|ferrous iron binding|heme binding|iron-responsive element binding|2 iron, 2 sulfur cluster binding|	20	-2.41854	-5.09411	4.77528e-09	1.65559e-07
HIST1H2BO	ENSG00000196331	8348	histone cluster 1 H2B family member o	nucleosome|nucleus|nucleoplasm|	chromatin organization|nucleosome assembly|	DNA binding|protein heterodimerization activity|	20	-1.70468	-5.09411	3.39491e-10	2.01176e-08
HIST1H4K	ENSG00000197914	8362	histone cluster 1 H4 family member k				18	-1.37435	-5.0898	6.44639e-09	2.08985e-07
KANSL2	ENSG00000139620	54934	KAT8 regulatory NSL complex subunit 2	histone acetyltransferase complex|nucleoplasm|	chromatin organization|histone H4-K5 acetylation|histone H4-K8 acetylation|histone H4-K16 acetylation|	histone acetyltransferase activity (H4-K5 specific)|histone acetyltransferase activity (H4-K8 specific)|histone acetyltransferase activity (H4-K16 specific)|	20	-2.88064	-5.08251	1.27943e-10	9.98059e-09
PDXK	ENSG00000160209	8566	pyridoxal kinase	nucleus|cytoplasm|cytosol|cytosol|extracellular vesicular exosome|	vitamin metabolic process|water-soluble vitamin metabolic process|cell proliferation|pyridoxal 5'-phosphate salvage|phosphorylation|vitamin B6 metabolic process|vitamin B6 metabolic process|pyridoxal phosphate biosynthetic process|small molecule metabolic process|	magnesium ion binding|ATP binding|zinc ion binding|pyridoxal kinase activity|pyridoxal kinase activity|pyridoxal phosphate binding|potassium ion binding|sodium ion binding|lithium ion binding|protein homodimerization activity|	20	-1.44603	-5.08225	2.98217e-10	1.81567e-08
C9orf78	ENSG00000136819	51759	chromosome 9 open reading frame 78	nucleus|cytoplasm|			20	-2.23721	-5.08076	1.5611e-10	1.15464e-08
MRPS18C	ENSG00000163319	51023	mitochondrial ribosomal protein S18C	mitochondrial small ribosomal subunit|	translation|	structural constituent of ribosome|	20	-2.07898	-5.0803	3.52404e-08	8.42815e-07
PTBP1	ENSG00000011304	5725	polypyrimidine tract binding protein 1	nucleoplasm|nucleolus|membrane|extracellular vesicular exosome|	alternative mRNA splicing, via spliceosome|regulation of alternative mRNA splicing, via spliceosome|mRNA splicing, via spliceosome|mRNA processing|RNA splicing|gene expression|negative regulation of RNA splicing|negative regulation of mRNA splicing, via spliceosome|negative regulation of muscle cell differentiation|	nucleotide binding|RNA binding|protein binding|poly-pyrimidine tract binding|pre-mRNA binding|poly(A) RNA binding|	20	-3.62596	-5.07524	8.76587e-10	4.30109e-08
MCAT	ENSG00000100294	27349	malonyl-CoA-acyl carrier protein transacylase	mitochondrion|	fatty acid biosynthetic process|fatty acid biosynthetic process|metabolic process|	[acyl-carrier-protein] S-malonyltransferase activity|transferase activity|poly(A) RNA binding|	20	-2.86242	-5.07313	3.28693e-12	6.85997e-10
FASTKD5	ENSG00000215251	60493	FAST kinase domains 5	mitochondrion|	protein phosphorylation|cellular respiration|	protein kinase activity|poly(A) RNA binding|	20	-2.20808	-5.07168	4.23341e-12	7.90105e-10
DENR	ENSG00000139726	8562	density regulated re-initiation and release factor	cellular_component|	formation of translation preinitiation complex|IRES-dependent translational initiation|biological_process|ribosome disassembly|	molecular_function|translation initiation factor activity|protein binding|	20	-2.84	-5.06837	1.06429e-06	1.51813e-05
AC009060.1	ENSG00000269746						14	-2.24212	-5.06377	6.18411e-10	3.30822e-08
MRPL28	ENSG00000086504	10573	mitochondrial ribosomal protein L28	nucleus|cytoplasm|mitochondrion|mitochondrial ribosome|mitochondrial ribosome|	translation|	structural constituent of ribosome|protein binding|poly(A) RNA binding|	20	-3.33519	-5.05514	1.0086e-10	8.32301e-09
PSME3	ENSG00000131467	10197	proteasome activator subunit 3	proteasome complex|nucleus|nucleoplasm|cytoplasm|cytosol|proteasome activator complex|membrane|	G1/S transition of mitotic cell cycle|protein polyubiquitination|mitotic cell cycle|antigen processing and presentation of peptide antigen via MHC class I|antigen processing and presentation of exogenous peptide antigen via MHC class I, TAP-dependent|regulation of cellular amino acid metabolic process|apoptotic process|DNA damage response, signal transduction by p53 class mediator resulting in ce…	p53 binding|protein binding|endopeptidase activator activity|MDM2/MDM4 family protein binding|	20	-2.09978	-5.05248	8.21968e-12	1.2925e-09
CDIPT	ENSG00000103502	10423	CDP-diacylglycerol--inositol 3-phosphatidyltransferase	Golgi membrane|endoplasmic reticulum membrane|plasma membrane|membrane|integral component of membrane|	phospholipid metabolic process|phosphatidylinositol biosynthetic process|phosphatidylinositol biosynthetic process|small molecule metabolic process|CDP-diacylglycerol metabolic process|glycerophospholipid biosynthetic process|	CDP-diacylglycerol-inositol 3-phosphatidyltransferase activity|CDP-diacylglycerol-inositol 3-phosphatidyltransferase activity|diacylglycerol binding|manganese ion binding|carbohydrate binding|alcohol binding|	20	-3.38013	-5.04969	1.10577e-07	2.22603e-06
SAMD4B	ENSG00000179134	55095	sterile alpha motif domain containing 4B	nucleus|cytoplasm|	transcription, DNA-templated|regulation of transcription, DNA-templated|	poly(A) RNA binding|	20	-2.03811	-5.04818	3.25098e-09	1.23408e-07
UQCR10	ENSG00000184076	29796	ubiquinol-cytochrome c reductase, complex III subunit X	mitochondrial inner membrane|mitochondrial respiratory chain complex III|extracellular vesicular exosome|	mitochondrial electron transport, ubiquinol to cytochrome c|respiratory electron transport chain|cellular metabolic process|small molecule metabolic process|hydrogen ion transmembrane transport|	ubiquinol-cytochrome-c reductase activity|	20	-2.64116	-5.0481	1.43173e-08	3.99286e-07
HSD17B12	ENSG00000149084	51144	hydroxysteroid 17-beta dehydrogenase 12	endoplasmic reticulum membrane|integral component of membrane|extracellular matrix|	fatty acid biosynthetic process|estrogen biosynthetic process|positive regulation of cell-substrate adhesion|triglyceride biosynthetic process|extracellular matrix organization|long-chain fatty-acyl-CoA biosynthetic process|cellular lipid metabolic process|small molecule metabolic process|oxidation-reduction process|	fibronectin binding|estradiol 17-beta-dehydrogenase activity|protein binding|collagen binding|heparin binding|	20	-2.31702	-5.04802	3.98294e-07	6.70087e-06
UQCC1	ENSG00000101019	55245	ubiquinol-cytochrome c reductase complex assembly factor 1	mitochondrion|cytoplasmic membrane-bounded vesicle|			20	-1.52534	-5.04175	5.30331e-08	1.18464e-06
RABL2B	ENSG00000079974	11158	RAB, member of RAS oncogene family like 2B		GTP catabolic process|small GTPase mediated signal transduction|	GTPase activity|GTP binding|	20	-1.79323	-5.04035	1.13374e-09	5.32726e-08
RECQL4	ENSG00000160957	9401	RecQ like helicase 4	nucleus|cytoplasm|membrane|	DNA strand renaturation|ATP catabolic process|DNA replication|DNA repair|DNA recombination|multicellular organismal development|DNA duplex unwinding|	bubble DNA binding|ATP binding|zinc ion binding|annealing helicase activity|ATP-dependent 3'-5' DNA helicase activity|	20	-1.73267	-5.03789	1.24888e-07	2.46444e-06
PTK6	ENSG00000101213	5753	protein tyrosine kinase 6	ruffle|nucleus|cytoplasm|membrane|	protein phosphorylation|positive regulation of neuron projection development|cell migration|tyrosine phosphorylation of Stat3 protein|tyrosine phosphorylation of Stat5 protein|negative regulation of growth|protein autophosphorylation|intestinal epithelial cell differentiation|negative regulation of protein tyrosine kinase activity|cellular response to retinoic acid|	protein serine/threonine kinase activity|non-membrane spanning protein tyrosine kinase activity|protein binding|ATP binding|identical protein binding|	20	-1.66832	-5.03198	6.65925e-09	2.14147e-07
ATP5H	ENSG00000167863	10476	ATP synthase, H+ transporting, mitochondrial Fo complex subunit D	mitochondrial proton-transporting ATP synthase complex, coupling factor F(o)|mitochondrion|mitochondrial inner membrane|mitochondrial inner membrane|mitochondrial proton-transporting ATP synthase complex|extracellular vesicular exosome|	ATP catabolic process|respiratory electron transport chain|mitochondrial ATP synthesis coupled proton transport|mitochondrial ATP synthesis coupled proton transport|cellular metabolic process|small molecule metabolic process|	hydrogen ion transmembrane transporter activity|ATPase activity|transmembrane transporter activity|	20	-3.87275	-5.03088	2.88409e-13	1.74531e-10
TRNT1	ENSG00000072756	51095	tRNA nucleotidyl transferase 1	intracellular|mitochondrion|	tRNA 3'-terminal CCA addition|protein targeting to mitochondrion|tRNA 3'-end processing|	tRNA binding|tRNA adenylyltransferase activity|ATP binding|CTP:tRNA cytidylyltransferase activity|CTP:3'-cytidine-tRNA cytidylyltransferase activity|ATP:3'-cytidine-cytidine-tRNA adenylyltransferase activity|	20	-1.81583	-5.03002	1.44287e-08	4.00751e-07
MRPL49	ENSG00000149792	740	mitochondrial ribosomal protein L49	mitochondrial ribosome|	translation|	structural constituent of ribosome|protein binding|	20	-2.46264	-5.0226	2.26292e-10	1.46723e-08
FANCE	ENSG00000112039	2178	Fanconi anemia complementation group E	nucleus|nucleoplasm|Fanconi anaemia nuclear complex|	DNA repair|	molecular_function|	18	-1.72322	-5.02066	6.59747e-10	3.47629e-08
COX6B1	ENSG00000126267	1340	cytochrome c oxidase subunit 6B1	mitochondrion|mitochondrial inner membrane|mitochondrial intermembrane space|	substantia nigra development|respiratory electron transport chain|cellular metabolic process|small molecule metabolic process|hydrogen ion transmembrane transport|hydrogen ion transmembrane transport|	cytochrome-c oxidase activity|	20	-3.68554	-5.02032	1.17084e-11	1.68214e-09
PSMC4	ENSG00000013275	5704	proteasome 26S subunit, ATPase 4	proteasome complex|nucleus|nucleoplasm|cytoplasm|cytosol|membrane|inclusion body|proteasome accessory complex|cytosolic proteasome complex|	G1/S transition of mitotic cell cycle|protein polyubiquitination|mitotic cell cycle|blastocyst development|antigen processing and presentation of peptide antigen via MHC class I|antigen processing and presentation of exogenous peptide antigen via MHC class I, TAP-dependent|ATP catabolic process|proteolysis|regulation of cellular amino acid metabolic process|apoptotic process|DNA damage response, …	protein binding|ATP binding|ATPase activity|	20	-2.4097	-5.01874	6.65581e-09	2.14147e-07
P2RX2	ENSG00000187848	22953	purinergic receptor P2X 2	integral component of nuclear inner membrane|integral component of plasma membrane|cell surface|postsynaptic density|apical plasma membrane|presynaptic membrane|neuronal cell body|terminal bouton|dendritic spine|receptor complex|	response to hypoxia|detection of hypoxic conditions in blood by carotid body chemoreceptor signaling|cation transport|cation transport|cation transport|neuromuscular synaptic transmission|neuromuscular junction development|sensory perception of sound|response to carbohydrate|positive regulation of calcium ion transport into cytosol|urinary bladder smooth muscle contraction|neuronal action potenti…	purinergic nucleotide receptor activity|extracellular ATP-gated cation channel activity|extracellular ATP-gated cation channel activity|copper ion binding|ATP binding|drug binding|zinc ion binding|ligand-gated ion channel activity|nickel cation binding|phosphatidylinositol binding|identical protein binding|mercury ion binding|cadmium ion binding|cobalt ion binding|	20	-1.9522	-5.01794	1.0554e-08	3.13169e-07
XPO5	ENSG00000124571	57510	exportin 5	nucleus|nucleoplasm|cytoplasm|cytosol|	protein export from nucleus|gene expression|gene silencing by RNA|	tRNA binding|RNA binding|protein binding|Ran GTPase binding|protein transporter activity|poly(A) RNA binding|	18	-2.48599	-5.01658	4.03907e-07	6.78387e-06
AC009892.10	ENSG00000224730						20	-1.88248	-5.01589	5.02018e-07	8.1906e-06
BIRC7	ENSG00000101197	79444	baculoviral IAP repeat containing 7	nucleus|cytoplasm|Golgi apparatus|	apoptotic process|activation of JUN kinase activity|negative regulation of endopeptidase activity|negative regulation of endopeptidase activity|protein ubiquitination|regulation of cell proliferation|negative regulation of apoptotic process|negative regulation of apoptotic process|regulation of natural killer cell apoptotic process|	ubiquitin-protein transferase activity|cysteine-type endopeptidase inhibitor activity|protein binding|zinc ion binding|ligase activity|enzyme binding|	20	-1.84239	-5.01504	1.56477e-08	4.29476e-07
HIST1H2BC	ENSG00000180596	8347	histone cluster 1 H2B family member c	nucleosome|extracellular space|nucleus|nucleoplasm|extracellular vesicular exosome|	innate immune response in mucosa|chromatin organization|nucleosome assembly|antibacterial humoral response|defense response to Gram-positive bacterium|	DNA binding|protein heterodimerization activity|	20	-2.35026	-5.01372	1.53492e-12	4.34699e-10
SERINC4	ENSG00000184716	619189	serine incorporator 4	integral component of membrane|	phospholipid biosynthetic process|		20	-1.44163	-5.01287	9.30138e-09	2.82293e-07
SARS	ENSG00000031698	6301	seryl-tRNA synthetase	cytoplasm|mitochondrion|cytosol|extracellular vesicular exosome|	translation|tRNA aminoacylation for protein translation|seryl-tRNA aminoacylation|tRNA processing|gene expression|selenocysteinyl-tRNA(Sec) biosynthetic process|	RNA binding|serine-tRNA ligase activity|ATP binding|	20	-2.92385	-5.01236	3.92456e-08	9.20958e-07
RPS18	ENSG00000231500	6222	ribosomal protein S18	nucleus|cytosol|cytosol|ribosome|small ribosomal subunit|small ribosomal subunit|membrane|cytosolic small ribosomal subunit|extracellular vesicular exosome|	nuclear-transcribed mRNA catabolic process, nonsense-mediated decay|translation|translation|translation|translational initiation|translational elongation|translational termination|SRP-dependent cotranslational protein targeting to membrane|gene expression|viral process|RNA metabolic process|mRNA metabolic process|viral life cycle|viral transcription|ribosome biogenesis|cellular protein metabolic …	structural constituent of ribosome|protein binding|rRNA binding|poly(A) RNA binding|	16	-4.04235	-5.01179	1.37558e-05	0.0001336
NUP153	ENSG00000124789	9972	nucleoporin 153	nuclear pore|nucleoplasm|nucleolus|cytoplasm|nuclear membrane|nuclear periphery|nuclear inclusion body|nuclear pore nuclear basket|	mitotic cell cycle|carbohydrate metabolic process|mitotic nuclear envelope disassembly|hexose transport|regulation of glucose transport|protein transport|glucose transport|viral process|cytokine-mediated signaling pathway|small molecule metabolic process|viral entry into host cell|negative regulation of RNA export from nucleus|mRNA transport|nuclear pore complex assembly|transmembrane transport|v…	DNA binding|transporter activity|nucleocytoplasmic transporter activity|protein binding|zinc ion binding|structural constituent of nuclear pore|identical protein binding|protein anchor|	20	-2.16517	-5.00046	2.02442e-06	2.62569e-05
NCAPD2	ENSG00000010292	9918	non-SMC condensin I complex subunit D2	nuclear chromosome|condensed chromosome|condensin complex|condensin core heterodimer|nucleus|nucleus|cytoplasm|cytoplasm|cytoplasm|cytosol|membrane|pronucleus|	mitotic cell cycle|mitotic chromosome condensation|mitotic chromosome condensation|	protein binding|histone binding|histone binding|	20	-3.54152	-4.99943	2.95667e-09	1.15322e-07
SLC35A2	ENSG00000102100	7355	solute carrier family 35 member A2	Golgi membrane|nucleus|Golgi apparatus|integral component of membrane|	galactose metabolic process|UDP-galactose transport|proton transport|transmembrane transport|UDP-galactose transmembrane transport|	sugar:proton symporter activity|UDP-galactose transmembrane transporter activity|protein binding|	20	-1.40057	-4.9959	6.72098e-08	1.45258e-06
MRPS16	ENSG00000182180	51021	mitochondrial ribosomal protein S16	mitochondrial small ribosomal subunit|	translation|	structural constituent of ribosome|protein binding|	20	-2.64688	-4.9851	1.95903e-11	2.41492e-09
TRNAU1AP	ENSG00000180098	54952	tRNA selenocysteine 1 associated protein 1	nucleus|cytoplasm|	selenocysteine incorporation|	nucleotide binding|poly(A) RNA binding|	18	-1.3363	-4.98064	4.40137e-08	1.01029e-06
PIN1	ENSG00000127445	5300	peptidylprolyl cis/trans isomerase, NIMA-interacting 1	nucleus|nucleoplasm|cytoplasm|nuclear speck|midbody|	protein peptidyl-prolyl isomerization|protein peptidyl-prolyl isomerization|positive regulation of protein phosphorylation|protein folding|cell cycle|regulation of mitosis|cytokine-mediated signaling pathway|negative regulation of transforming growth factor beta receptor signaling pathway|positive regulation of Rho GTPase activity|regulation of cytokinesis|regulation of cytokinesis|negative regul…	peptidyl-prolyl cis-trans isomerase activity|protein binding|mitogen-activated protein kinase kinase binding|GTPase activating protein binding|phosphoserine binding|phosphothreonine binding|phosphothreonine binding|	20	-1.75202	-4.97932	6.07532e-06	6.73642e-05
INTS6	ENSG00000102786	26512	integrator complex subunit 6	nucleus|actin cytoskeleton|integrator complex|	signal transduction|snRNA processing|	transmembrane signaling receptor activity|protein binding|	20	-2.07567	-4.97871	4.445e-10	2.52896e-08
CDC34	ENSG00000099804	997	cell division cycle 34	nucleus|nucleus|cytoplasm|	G1/S transition of mitotic cell cycle|protein polyubiquitination|DNA replication initiation|cellular protein modification process|protein ubiquitination|protein ubiquitination|proteasome-mediated ubiquitin-dependent protein catabolic process|positive regulation of neuron apoptotic process|negative regulation of cAMP-mediated signaling|response to growth factor|protein K48-linked ubiquitination|po…	ubiquitin-protein transferase activity|ubiquitin-protein transferase activity|protein binding|ATP binding|acid-amino acid ligase activity|	20	-1.69566	-4.97832	7.16293e-10	3.69622e-08
FRG2B	ENSG00000225899	441581	FSHD region gene 2 family member B	nucleus|			14	-1.87235	-4.97388	2.63296e-08	6.59727e-07
GINS4	ENSG00000147536	84296	GINS complex subunit 4	nucleoplasm|cytoplasm|	mitotic cell cycle|DNA strand elongation involved in DNA replication|	protein binding|	20	-2.03115	-4.96616	1.86126e-10	1.29499e-08
NDUFV1	ENSG00000167792	4723	NADH:ubiquinone oxidoreductase core subunit V1	mitochondrial inner membrane|mitochondrial inner membrane|mitochondrial respiratory chain complex I|mitochondrial respiratory chain complex I|mitochondrial respiratory chain complex I|	mitochondrial electron transport, NADH to ubiquinone|mitochondrial electron transport, NADH to ubiquinone|respiratory electron transport chain|cellular metabolic process|small molecule metabolic process|	NADH dehydrogenase (ubiquinone) activity|FMN binding|metal ion binding|NAD binding|4 iron, 4 sulfur cluster binding|	20	-2.63338	-4.96614	1.36133e-08	3.82898e-07
TSEN54	ENSG00000182173	283989	tRNA splicing endonuclease subunit 54	nucleolus|	tRNA splicing, via endonucleolytic cleavage and ligation|mRNA processing|		20	-2.95185	-4.95105	4.47957e-10	2.54139e-08
SNRPB	ENSG00000125835	6628	small nuclear ribonucleoprotein polypeptides B and B1	nucleoplasm|spliceosomal complex|U7 snRNP|U1 snRNP|U4 snRNP|U12-type spliceosomal complex|cytosol|cytosol|small nuclear ribonucleoprotein complex|methylosome|SMN-Sm protein complex|extracellular vesicular exosome|catalytic step 2 spliceosome|histone pre-mRNA 3'end processing complex|	spliceosomal snRNP assembly|spliceosomal snRNP assembly|mRNA splicing, via spliceosome|mRNA splicing, via spliceosome|transcription from RNA polymerase II promoter|termination of RNA polymerase II transcription|histone mRNA metabolic process|RNA splicing|gene expression|RNA metabolic process|mRNA 3'-end processing|ncRNA metabolic process|	protein binding|poly(A) RNA binding|histone pre-mRNA DCP binding|	18	-2.1949	-4.94262	4.84743e-10	2.72685e-08
ZNF217	ENSG00000171940	7764	zinc finger protein 217	histone deacetylase complex|nucleoplasm|	transcription, DNA-templated|regulation of transcription, DNA-templated|negative regulation of transcription, DNA-templated|	sequence-specific DNA binding transcription factor activity|protein binding|transcription regulatory region DNA binding|metal ion binding|	20	-2.12472	-4.94223	4.49414e-09	1.57453e-07
POLE	ENSG00000177084	5426	DNA polymerase epsilon, catalytic subunit	nucleus|nucleoplasm|cytoplasm|plasma membrane|epsilon DNA polymerase complex|	G1/S transition of mitotic cell cycle|G1/S transition of mitotic cell cycle|mitotic cell cycle|telomere maintenance via recombination|telomere maintenance|DNA synthesis involved in DNA repair|in utero embryonic development|DNA replication|DNA replication initiation|DNA repair|transcription-coupled nucleotide-excision repair|base-excision repair, gap-filling|nucleotide-excision repair|nucleotide-e…	nucleotide binding|DNA binding|chromatin binding|DNA-directed DNA polymerase activity|zinc ion binding|4 iron, 4 sulfur cluster binding|	18	-2.66267	-4.94088	3.3239e-08	8.01669e-07
MED25	ENSG00000104973	81857	mediator complex subunit 25	nucleoplasm|	negative regulation of transcription from RNA polymerase II promoter|transcription initiation from RNA polymerase II promoter|cell death|gene expression|positive regulation of chromatin binding|positive regulation of transcription from RNA polymerase II promoter|negative regulation of fibroblast proliferation|positive regulation of cell cycle arrest|positive regulation of mediator complex assembl…	protein binding|transcription factor binding|retinoic acid receptor binding|retinoid X receptor binding|	20	-1.93367	-4.938	2.22016e-08	5.73565e-07
TTC1	ENSG00000113312	7265	tetratricopeptide repeat domain 1	peroxisomal membrane|	protein folding|	protein binding|unfolded protein binding|	20	-1.96794	-4.93793	1.37392e-06	1.89092e-05
GPX4	ENSG00000167468	2879	glutathione peroxidase 4	nucleus|nuclear envelope|mitochondrion|mitochondrial inner membrane|cytosol|extracellular vesicular exosome|	chromatin organization|phospholipid metabolic process|glutathione metabolic process|multicellular organismal development|spermatogenesis|aging|arachidonic acid metabolic process|lipoxygenase pathway|response to estradiol|hydrogen peroxide catabolic process|small molecule metabolic process|regulation of inflammatory response|oxidation-reduction process|	glutathione peroxidase activity|selenium binding|glutathione binding|phospholipid-hydroperoxide glutathione peroxidase activity|	20	-3.82943	-4.93284	1.81363e-08	4.84444e-07
FTO	ENSG00000140718	79068	FTO, alpha-ketoglutarate dependent dioxygenase	nucleus|nuclear speck|	temperature homeostasis|DNA dealkylation involved in DNA repair|regulation of lipid storage|oxidative single-stranded DNA demethylation|oxidative single-stranded RNA demethylation|regulation of multicellular organism growth|RNA repair|regulation of respiratory system process|adipose tissue development|regulation of white fat cell proliferation|oxidative demethylation|DNA demethylation|	ferrous iron binding|oxidative RNA demethylase activity|oxidative DNA demethylase activity|DNA-N1-methyladenine dioxygenase activity|	20	-1.62432	-4.93215	1.20302e-06	1.69185e-05
LETM1	ENSG00000168924	3954	leucine zipper and EF-hand containing transmembrane protein 1	mitochondrion|mitochondrial inner membrane|integral component of membrane|	cristae formation|	calcium ion binding|protein binding|	20	-2.53098	-4.93048	2.60293e-06	3.24675e-05
HSPA13	ENSG00000155304	6782	heat shock protein family A (Hsp70) member 13	endoplasmic reticulum|intracellular membrane-bounded organelle|extracellular vesicular exosome|		ATP binding|	20	-1.91661	-4.92994	1.31765e-10	1.02387e-08
CTNNBL1	ENSG00000132792	56259	catenin beta like 1	Prp19 complex|nucleus|spliceosomal complex|cytoplasm|membrane|	mRNA processing|apoptotic process|RNA splicing|somatic diversification of immunoglobulins|positive regulation of apoptotic process|	protein binding|enzyme binding|	20	-1.9513	-4.92967	1.50236e-08	4.14968e-07
UQCR11	ENSG00000127540	10975	ubiquinol-cytochrome c reductase, complex III subunit XI	mitochondrial inner membrane|integral component of membrane|respiratory chain|	generation of precursor metabolites and energy|respiratory electron transport chain|cellular metabolic process|small molecule metabolic process|hydrogen ion transmembrane transport|	ubiquinol-cytochrome-c reductase activity|electron carrier activity|	20	-1.68319	-4.92557	2.11453e-09	8.70664e-08
UBIAD1	ENSG00000120942	29914	UbiA prenyltransferase domain containing 1	nucleus|cytoplasm|endoplasmic reticulum|endoplasmic reticulum membrane|membrane|integral component of Golgi membrane|mitochondrial membrane|	ubiquinone biosynthetic process|ubiquinone biosynthetic process|menaquinone biosynthetic process|menaquinone biosynthetic process|vitamin K biosynthetic process|vitamin K biosynthetic process|	prenyltransferase activity|protein binding|antioxidant activity|	16	-2.32327	-4.92544	6.58701e-09	2.12852e-07
RC3H1	ENSG00000135870	149041	ring finger and CCCH-type domains 1	cytoplasmic mRNA processing body|cytoplasmic stress granule|	nuclear-transcribed mRNA catabolic process|regulation of germinal center formation|negative regulation of germinal center formation|posttranscriptional regulation of gene expression|protein ubiquitination|negative regulation of B cell proliferation|cytoplasmic mRNA processing body assembly|regulation of mRNA stability|negative regulation of T-helper cell differentiation|negative regulation of act…	mRNA 3'-UTR binding|ubiquitin-protein transferase activity|zinc ion binding|poly(A) RNA binding|	18	-1.43164	-4.92389	1.11835e-07	2.24682e-06
UBE2M	ENSG00000130725	9040	ubiquitin conjugating enzyme E2 M	cytosol|extracellular vesicular exosome|	cellular protein modification process|cellular protein modification process|transforming growth factor beta receptor signaling pathway|protein ubiquitination|protein ubiquitination|positive regulation of neuron apoptotic process|protein neddylation|protein neddylation|	ubiquitin-protein transferase activity|ubiquitin-protein transferase activity|protein binding|ATP binding|ribosomal S6-glutamic acid ligase activity|NEDD8 ligase activity|	20	-2.76976	-4.9188	4.89793e-08	1.10772e-06
TIMMDC1	ENSG00000113845	51300	translocase of inner mitochondrial membrane domain containing 1	nucleus|mitochondrion|integral component of membrane|mitochondrial membrane|			20	-2.25021	-4.9178	3.18601e-09	1.2227e-07
RPS4X	ENSG00000198034	6191	ribosomal protein S4, X-linked	cytosol|ribosome|polysome|small ribosomal subunit|membrane|cytosolic small ribosomal subunit|cytosolic small ribosomal subunit|ribonucleoprotein complex|cytoplasmic ribonucleoprotein granule|extracellular vesicular exosome|	nuclear-transcribed mRNA catabolic process, nonsense-mediated decay|translation|translation|translation|translational initiation|translational elongation|translational termination|SRP-dependent cotranslational protein targeting to membrane|multicellular organismal development|positive regulation of cell proliferation|gene expression|viral process|RNA metabolic process|mRNA metabolic process|viral…	structural constituent of ribosome|rRNA binding|poly(A) RNA binding|	16	-2.92995	-4.91644	1.14762e-10	9.35429e-09
KDM2A	ENSG00000173120	22992	lysine demethylase 2A	nuclear chromatin|nucleus|nucleoplasm|nucleolus|	transcription, DNA-templated|regulation of transcription, DNA-templated|oxidation-reduction process|histone H3-K36 demethylation|	zinc ion binding|unmethylated CpG binding|histone demethylase activity (H3-K36 specific)|	20	-1.96827	-4.91606	1.70728e-09	7.37975e-08
RCL1	ENSG00000120158	10171	RNA terminal phosphate cyclase like 1	nucleolus|	RNA processing|biological_process|ribosome biogenesis|	catalytic activity|	20	-3.20655	-4.91363	4.5748e-13	2.12462e-10
MRPL44	ENSG00000135900	65080	mitochondrial ribosomal protein L44	cellular_component|mitochondrion|ribosome|	RNA processing|mitochondrial translational elongation|RNA phosphodiester bond hydrolysis, endonucleolytic|	ribonuclease III activity|poly(A) RNA binding|	20	-1.79636	-4.91143	7.06815e-07	1.09335e-05
PCMTD2	ENSG00000203880	55251	protein-L-isoaspartate (D-aspartate) O-methyltransferase domain containing 2	cytoplasm|	protein methylation|	protein-L-isoaspartate (D-aspartate) O-methyltransferase activity|	20	-1.91875	-4.90632	1.33859e-09	6.04788e-08
NCLN	ENSG00000125912	56926	nicalin	endoplasmic reticulum membrane|membrane|integral component of membrane|	proteolysis|regulation of signal transduction|	protein binding|peptidase activity|	20	-1.85073	-4.90485	1.40094e-11	1.85641e-09
COA5	ENSG00000183513	493753	cytochrome c oxidase assembly factor 5	mitochondrion|			18	-3.45624	-4.90292	2.56935e-09	1.03531e-07
ZBTB7A	ENSG00000178951	51341	zinc finger and BTB domain containing 7A	nucleus|	negative regulation of transcription from RNA polymerase II promoter|transcription, DNA-templated|multicellular organismal development|cell differentiation|negative regulation of transcription, DNA-templated|	DNA binding|histone acetyltransferase binding|metal ion binding|	18	-1.8622	-4.89934	1.52859e-07	2.92326e-06
MBOAT7	ENSG00000125505	79143	membrane bound O-acyltransferase domain containing 7	endoplasmic reticulum membrane|membrane|integral component of membrane|	phospholipid metabolic process|ventricular system development|phosphatidylinositol acyl-chain remodeling|small molecule metabolic process|glycerophospholipid biosynthetic process|	protein binding|transferase activity, transferring acyl groups other than amino-acyl groups|	20	-1.57753	-4.89926	6.96489e-07	1.08036e-05
UBOX5	ENSG00000185019	22888	U-box domain containing 5	ubiquitin ligase complex|nucleus|	protein polyubiquitination|	zinc ion binding|ubiquitin-ubiquitin ligase activity|	20	-2.2191	-4.89855	1.52426e-08	4.20435e-07
ZEB1	ENSG00000148516	6935	zinc finger E-box binding homeobox 1	nucleus|transcription factor complex|cytoplasm|	negative regulation of transcription from RNA polymerase II promoter|transcription, DNA-templated|regulation of transcription from RNA polymerase II promoter|immune response|pattern specification process|cell proliferation|negative regulation of cell proliferation|regulation of mesenchymal cell proliferation|response to activity|regulation of transforming growth factor beta receptor signaling pat…	chromatin binding|double-stranded DNA binding|sequence-specific DNA binding transcription factor activity|transcription coactivator activity|transcription corepressor activity|protein binding|transcription factor binding|zinc ion binding|sequence-specific DNA binding|E-box binding|	20	-1.57451	-4.8908	1.65624e-09	7.22682e-08
ATP5O	ENSG00000241837	539	ATP synthase, H+ transporting, mitochondrial F1 complex, O subunit	nucleus|mitochondrion|mitochondrial inner membrane|mitochondrial proton-transporting ATP synthase complex|mitochondrial proton-transporting ATP synthase complex|plasma membrane|extracellular vesicular exosome|	ATP catabolic process|ATP biosynthetic process|proton transport|respiratory electron transport chain|mitochondrial ATP synthesis coupled proton transport|mitochondrial ATP synthesis coupled proton transport|cellular metabolic process|small molecule metabolic process|	transporter activity|drug binding|ATPase activity|transmembrane transporter activity|proton-transporting ATP synthase activity, rotational mechanism|	20	-2.84688	-4.88771	3.02017e-08	7.38223e-07
SUPT16H	ENSG00000092201	11198	SPT16 homolog, facilitates chromatin remodeling subunit	nucleus|nucleoplasm|chromosome|	DNA replication|DNA repair|nucleosome disassembly|transcription from RNA polymerase II promoter|transcription elongation from RNA polymerase II promoter|gene expression|viral process|positive regulation of DNA-templated transcription, elongation|positive regulation of viral transcription|	protein binding|poly(A) RNA binding|	20	-2.16448	-4.88571	6.38568e-07	1.00411e-05
CRLS1	ENSG00000088766	54675	cardiolipin synthase 1	mitochondrial inner membrane|integral component of membrane|	phospholipid metabolic process|cardiolipin biosynthetic process|phosphatidylglycerol acyl-chain remodeling|small molecule metabolic process|glycerophospholipid biosynthetic process|	phosphotransferase activity, for other substituted phosphate groups|	20	-2.57307	-4.88474	5.1112e-11	4.86616e-09
RNASEH1	ENSG00000171865	246243	ribonuclease H1	nucleus|mitochondrion|	mitochondrial DNA replication|RNA catabolic process|RNA phosphodiester bond hydrolysis|RNA phosphodiester bond hydrolysis, endonucleolytic|	magnesium ion binding|nucleic acid binding|RNA binding|RNA-DNA hybrid ribonuclease activity|ribonuclease activity|protein homodimerization activity|	20	-2.62348	-4.88356	1.12498e-08	3.30288e-07
KPNB1	ENSG00000108424	3837	karyopherin subunit beta 1	nucleus|nuclear envelope|nuclear pore|nucleoplasm|cytoplasm|cytosol|membrane|nuclear membrane|extracellular vesicular exosome|endoplasmic reticulum tubular network|	protein import into nucleus, translocation|apoptotic DNA fragmentation|protein import into nucleus|NLS-bearing protein import into nucleus|ribosomal protein import into nucleus|apoptotic process|cellular component disassembly involved in execution phase of apoptosis|viral process|viral life cycle|cytokine-mediated signaling pathway|small molecule metabolic process|intracellular transport of virus|	protein binding|nuclear localization sequence binding|zinc ion binding|Ran GTPase binding|protein transporter activity|enzyme binding|protein domain specific binding|poly(A) RNA binding|	18	-2.78885	-4.8778	1.36708e-09	6.13495e-08
OPA3	ENSG00000125741	80207	OPA3, outer mitochondrial membrane lipid metabolism regulator	mitochondrion|mitochondrion|	visual perception|regulation of lipid metabolic process|growth|response to stimulus|neuromuscular process|mitochondrion morphogenesis|		20	-1.75076	-4.87379	6.6222e-08	1.43278e-06
COX7B	ENSG00000131174	1349	cytochrome c oxidase subunit 7B	mitochondrial inner membrane|mitochondrial respiratory chain|integral component of membrane|	central nervous system development|respiratory electron transport chain|cellular metabolic process|small molecule metabolic process|hydrogen ion transmembrane transport|hydrogen ion transmembrane transport|	cytochrome-c oxidase activity|	18	-3.72089	-4.87122	3.36053e-07	5.82044e-06
LARS	ENSG00000133706	51520	leucyl-tRNA synthetase	nucleus|cytoplasm|cytosol|	tRNA aminoacylation for protein translation|leucyl-tRNA aminoacylation|regulation of translational fidelity|gene expression|	aminoacyl-tRNA editing activity|leucine-tRNA ligase activity|protein binding|ATP binding|	20	-2.034	-4.8697	5.99368e-10	3.23912e-08
ACLY	ENSG00000131473	47	ATP citrate lyase	nucleus|cytoplasm|mitochondrion|cytosol|plasma membrane|citrate lyase complex|membrane|extracellular vesicular exosome|	citrate metabolic process|energy reserve metabolic process|ATP catabolic process|lipid biosynthetic process|coenzyme A metabolic process|triglyceride biosynthetic process|positive regulation of cellular metabolic process|long-chain fatty-acyl-CoA biosynthetic process|cellular lipid metabolic process|cellular carbohydrate metabolic process|small molecule metabolic process|	ATP citrate synthase activity|succinate-CoA ligase (ADP-forming) activity|protein binding|ATP binding|metal ion binding|cofactor binding|	20	-2.82852	-4.86549	3.95686e-11	3.95092e-09
CTC1	ENSG00000178971	80169	CST telomere replication complex component 1	nuclear chromosome, telomeric region|nucleus|nucleus|Stn1-Ten1 complex|	telomere maintenance|cellular response to DNA damage stimulus|regulation of G2/M transition of mitotic cell cycle|telomere maintenance via telomere lengthening|multicellular organism growth|positive regulation of DNA replication|positive regulation of fibroblast proliferation|spleen development|thymus development|bone marrow development|hematopoietic stem cell proliferation|replicative senescence|	single-stranded DNA binding|protein binding|	20	-2.53224	-4.86352	1.27979e-09	5.8618e-08
RNF26	ENSG00000173456	79102	ring finger protein 26	cellular_component|integral component of membrane|	biological_process|	zinc ion binding|	20	-1.40515	-4.86227	1.64287e-08	4.47203e-07
MECR	ENSG00000116353	51102	mitochondrial trans-2-enoyl-CoA reductase	mitochondrion|	fatty acid metabolic process|fatty acid biosynthetic process|oxidation-reduction process|	zinc ion binding|trans-2-enoyl-CoA reductase (NADPH) activity|	20	-4.72488	-4.86155	8.44099e-10	4.17244e-08
RNF20	ENSG00000155827	56254	ring finger protein 20	ubiquitin ligase complex|nucleus|nucleolus|HULC complex|	protein polyubiquitination|regulation of transcription, DNA-templated|ubiquitin-dependent protein catabolic process|histone monoubiquitination|negative regulation of cell migration|positive regulation of histone methylation|histone H2B ubiquitination|positive regulation of transcription, DNA-templated|	p53 binding|chromatin binding|transcription coactivator activity|ubiquitin-protein transferase activity|ubiquitin-protein transferase activity|protein binding|zinc ion binding|ligase activity|ubiquitin protein ligase binding|histone binding|	20	-2.513	-4.85635	1.17241e-05	0.000117007
RAC1	ENSG00000136238	5879	ras-related C3 botulinum toxin substrate 1 (rho family, small GTP binding protein Rac1)	Golgi membrane|phagocytic cup|trans-Golgi network|cytosol|cytosol|plasma membrane|membrane|extrinsic component of plasma membrane|lamellipodium|ruffle membrane|cytoplasmic ribonucleoprotein granule|melanosome|extracellular vesicular exosome|	positive regulation of protein phosphorylation|auditory receptor cell morphogenesis|mast cell chemotaxis|epithelial cell morphogenesis|GTP catabolic process|cellular component movement|inflammatory response|hyperosmotic response|cell adhesion|cell-matrix adhesion|small GTPase mediated signal transduction|axon guidance|blood coagulation|cell proliferation|response to wounding|anatomical structure …	GTPase activity|protein binding|GTP binding|Rab GTPase binding|enzyme binding|protein kinase binding|GTP-dependent protein binding|thioesterase binding|Rho GDP-dissociation inhibitor binding|	20	-3.50237	-4.84456	4.03079e-11	4.00472e-09
WDR75	ENSG00000115368	84128	WD repeat domain 75	nucleus|		poly(A) RNA binding|	18	-3.33737	-4.84324	4.18437e-08	9.69395e-07
TRAPPC13	ENSG00000113597	80006	trafficking protein particle complex 13			protein binding|	20	-1.63873	-4.83306	1.12314e-10	9.23006e-09
RPRD2	ENSG00000163125	23248	regulation of nuclear pre-mRNA domain containing 2	DNA-directed RNA polymerase II, holoenzyme|			20	-2.36541	-4.83299	1.4281e-06	1.94537e-05
SKP1	ENSG00000113558	6500	S-phase kinase associated protein 1	nucleoplasm|cytosol|SCF ubiquitin ligase complex|Cul7-RING ubiquitin ligase complex|PcG protein complex|extracellular vesicular exosome|	G1/S transition of mitotic cell cycle|G2/M transition of mitotic cell cycle|mitotic cell cycle|Notch signaling pathway|viral process|protein ubiquitination|anaphase-promoting complex-dependent proteasomal ubiquitin-dependent protein catabolic process|SCF-dependent proteasomal ubiquitin-dependent protein catabolic process|histone H2A monoubiquitination|positive regulation of ubiquitin-protein liga…	ubiquitin-protein transferase activity|protein binding|	12	-2.00131	-4.82127	1.77867e-07	3.3172e-06
C12orf10	ENSG00000139637	60314	chromosome 12 open reading frame 10	nucleus|mitochondrion|extracellular vesicular exosome|	locomotory exploration behavior|pigmentation|	molecular_function|	20	-1.8504	-4.8202	1.89841e-07	3.51031e-06
SBDS	ENSG00000126524	51119	SBDS, ribosome assembly guanine nucleotide exchange factor	spindle pole|nucleus|nucleoplasm|nucleolus|cytoplasm|	inner cell mass cell proliferation|rRNA processing|cell proliferation|bone mineralization|leukocyte chemotaxis|mature ribosome assembly|ribosomal large subunit biogenesis|mitotic spindle stabilization|bone marrow development|	protein binding|microtubule binding|rRNA binding|ribosome binding|poly(A) RNA binding|	20	-4.36272	-4.81921	5.80882e-11	5.39545e-09
NDUFAF5	ENSG00000101247	79133	NADH:ubiquinone oxidoreductase complex assembly factor 5	extrinsic component of mitochondrial inner membrane|	methylation|mitochondrial respiratory chain complex I assembly|	molecular_function|methyltransferase activity|	20	-2.85029	-4.81354	2.21922e-10	1.45304e-08
NDC1	ENSG00000058804	55706	NDC1 transmembrane nucleoporin	nuclear pore|membrane|nuclear membrane|	protein transport|nuclear pore distribution|mRNA transport|nuclear pore complex assembly|	structural constituent of nuclear pore|	20	-1.5079	-4.81297	4.71954e-07	7.76352e-06
GID8	ENSG00000101193	54994	GID complex subunit 8 homolog	nucleus|cell junction|			18	-2.25368	-4.81081	9.18331e-08	1.90635e-06
ZNHIT2	ENSG00000174276	741	zinc finger HIT-type containing 2			metal ion binding|	18	-3.2678	-4.7999	2.59461e-08	6.51752e-07
SLC25A26	ENSG00000144741	115286	solute carrier family 25 member 26	mitochondrion|mitochondrial inner membrane|integral component of membrane|	S-adenosyl-L-methionine transport|S-adenosyl-L-methionine transmembrane transport|	S-adenosyl-L-methionine transmembrane transporter activity|	20	-3.10058	-4.79755	8.69221e-08	1.82144e-06
G6PD	ENSG00000160211	2539	glucose-6-phosphate dehydrogenase	nucleus|cytoplasm|cytosol|cytosol|cytoplasmic side of plasma membrane|membrane|extracellular vesicular exosome|	cytokine production|carbohydrate metabolic process|pentose-phosphate shunt|pentose-phosphate shunt|lipid metabolic process|cholesterol biosynthetic process|NADP metabolic process|NADPH regeneration|glutathione metabolic process|pentose-phosphate shunt, oxidative branch|negative regulation of protein glutathionylation|response to organic cyclic compound|pentose biosynthetic process|substantia nigr…	glucose-6-phosphate dehydrogenase activity|glucose-6-phosphate dehydrogenase activity|protein binding|glucose binding|glucose binding|protein homodimerization activity|NADP binding|	20	-1.88246	-4.79506	3.27667e-08	7.92191e-07
UBTF	ENSG00000108312	7343	upstream binding transcription factor, RNA polymerase I	nucleoplasm|nucleolus|nucleolus|	chromatin silencing at rDNA|regulation of transcription from RNA polymerase I promoter|transcription from RNA polymerase I promoter|transcription initiation from RNA polymerase I promoter|transcription elongation from RNA polymerase I promoter|termination of RNA polymerase I transcription|gene expression|positive regulation of transcription from RNA polymerase I promoter|	DNA binding|protein binding|poly(A) RNA binding|	20	-2.77699	-4.79454	4.80316e-13	2.17998e-10
URM1	ENSG00000167118	81605	ubiquitin related modifier 1	cytosol|extracellular vesicular exosome|	tRNA wobble uridine modification|protein urmylation|tRNA thio-modification|	protein binding|sulfurtransferase activity|	20	-2.99246	-4.79181	1.04878e-08	3.12239e-07
TOE1	ENSG00000132773	114034	target of EGR1, member 1 (nuclear)	nucleus|nucleolus|nuclear speck|		nucleic acid binding|protein binding|metal ion binding|	20	-1.95751	-4.77891	7.57638e-08	1.60958e-06
RFX7	ENSG00000181827	64864	regulatory factor X7	nucleus|	regulation of transcription, DNA-templated|	DNA binding|	20	-1.57457	-4.77659	1.80002e-08	4.82503e-07
PEX10	ENSG00000157911	5192	peroxisomal biogenesis factor 10	intracellular|peroxisome|peroxisomal membrane|integral component of peroxisomal membrane|integral component of peroxisomal membrane|	peroxisome organization|protein import into peroxisome matrix|protein import into peroxisome matrix|	protein binding|protein C-terminus binding|zinc ion binding|zinc ion binding|	20	-1.28805	-4.76974	4.22056e-08	9.75516e-07
MPDU1	ENSG00000129255	9526	mannose-P-dolichol utilization defect 1	mitochondrion|endoplasmic reticulum|endoplasmic reticulum membrane|membrane|integral component of membrane|extracellular vesicular exosome|	protein folding|dolichol-linked oligosaccharide biosynthetic process|transport|oligosaccharide biosynthetic process|oligosaccharide biosynthetic process|		20	-1.58763	-4.76963	1.62124e-10	1.18161e-08
FANCA	ENSG00000187741	2175	Fanconi anemia complementation group A	nucleus|nucleoplasm|nucleolus|cytoplasm|Fanconi anaemia nuclear complex|	DNA repair|protein complex assembly|male meiosis|male gonad development|female gonad development|regulation of cell proliferation|	protein binding|	20	-1.93599	-4.76384	4.56187e-08	1.04234e-06
AAMP	ENSG00000127837	14	angio associated migratory cell protein	cytoplasm|plasma membrane|cell surface|	angiogenesis|positive regulation of endothelial cell migration|smooth muscle cell migration|cell differentiation|	heparin binding|	20	-2.35195	-4.76259	9.05301e-08	1.88715e-06
CREB1	ENSG00000118260	1385	cAMP responsive element binding protein 1	nucleus|nucleoplasm|transcription factor complex|nuclear euchromatin|	toll-like receptor signaling pathway|MyD88-dependent toll-like receptor signaling pathway|MyD88-independent toll-like receptor signaling pathway|transcription from RNA polymerase II promoter|protein phosphorylation|signal transduction|epidermal growth factor receptor signaling pathway|activation of phospholipase C activity|Notch signaling pathway|synaptic transmission|axon guidance|lactation|circ…	RNA polymerase II core promoter proximal region sequence-specific DNA binding|RNA polymerase II distal enhancer sequence-specific DNA binding|RNA polymerase II core promoter proximal region sequence-specific DNA binding transcription factor activity involved in positive regulation of transcription|RNA polymerase II activating transcription factor binding|RNA polymerase II transcription factor bin…	20	-1.3364	-4.76048	1.36041e-08	3.82898e-07
KM-PA-2	ENSG00000204775						20	-2.80391	-4.75577	4.93669e-13	2.19079e-10
FANCG	ENSG00000221829	2189	Fanconi anemia complementation group G	nucleoplasm|nucleolus|cytoplasm|mitochondrion|plasma membrane|Fanconi anaemia nuclear complex|	cell cycle checkpoint|ovarian follicle development|DNA repair|mitochondrion organization|spermatid development|response to radiation|	damaged DNA binding|protein binding|	20	-1.80542	-4.7538	5.02157e-10	2.80114e-08
XRN1	ENSG00000114127	54464	5'-3' exoribonuclease 1	cytoplasmic mRNA processing body|cytosol|membrane|	nuclear-transcribed mRNA catabolic process, deadenylation-dependent decay|nuclear-transcribed mRNA catabolic process|gene expression|RNA metabolic process|mRNA metabolic process|rRNA catabolic process|exonucleolytic nuclear-transcribed mRNA catabolic process involved in deadenylation-dependent decay|nuclear mRNA surveillance|histone mRNA catabolic process|nucleic acid phosphodiester bond hydrolys…	DNA binding|protein binding|5'-3' exonuclease activity|poly(A) RNA binding|	20	-1.93932	-4.75217	3.73035e-10	2.17822e-08
SDHB	ENSG00000117118	6390	succinate dehydrogenase complex iron sulfur subunit B	mitochondrion|mitochondrial inner membrane|mitochondrial inner membrane|mitochondrial respiratory chain complex II|extracellular vesicular exosome|	tricarboxylic acid cycle|tricarboxylic acid cycle|succinate metabolic process|aerobic respiration|respiratory electron transport chain|cellular metabolic process|small molecule metabolic process|	protein binding|succinate dehydrogenase (ubiquinone) activity|electron carrier activity|metal ion binding|ubiquinone binding|2 iron, 2 sulfur cluster binding|3 iron, 4 sulfur cluster binding|4 iron, 4 sulfur cluster binding|	20	-3.24237	-4.74955	2.38913e-09	9.75684e-08
RPS26	ENSG00000197728	6231	ribosomal protein S26	nucleolus|cytoplasm|cytosol|small ribosomal subunit|membrane|cytosolic small ribosomal subunit|extracellular vesicular exosome|	nuclear-transcribed mRNA catabolic process, nonsense-mediated decay|translation|translation|translational initiation|translational elongation|translational termination|SRP-dependent cotranslational protein targeting to membrane|gene expression|viral process|RNA metabolic process|mRNA metabolic process|viral life cycle|viral transcription|negative regulation of RNA splicing|cellular protein metabo…	mRNA binding|structural constituent of ribosome|protein binding|poly(A) RNA binding|	16	-2.11236	-4.74592	1.23954e-05	0.00012236
CPSF3L	ENSG00000127054						20	-2.50642	-4.7428	8.86124e-11	7.56235e-09
RUVBL1	ENSG00000175792	8607	RuvB like AAA ATPase 1	Swr1 complex|nucleus|nucleoplasm|cytoplasm|Golgi apparatus|microtubule organizing center|membrane|nuclear matrix|Ino80 complex|NuA4 histone acetyltransferase complex|intracellular membrane-bounded organelle|extracellular vesicular exosome|MLL1 complex|	DNA repair|DNA recombination|chromatin organization|nucleosome assembly|transcription, DNA-templated|regulation of transcription from RNA polymerase II promoter|mitotic nuclear division|spermatogenesis|DNA duplex unwinding|DNA duplex unwinding|centromere-specific nucleosome assembly|regulation of growth|histone H4 acetylation|histone H2A acetylation|	DNA helicase activity|protein binding|ATP binding|	18	-2.37513	-4.73753	8.31148e-08	1.75125e-06
DPF2	ENSG00000133884	5977	double PHD fingers 2	nuclear chromatin|nucleus|cytoplasm|centrosome|intracellular membrane-bounded organelle|	transcription, DNA-templated|regulation of transcription, DNA-templated|apoptotic process|apoptotic signaling pathway|	RNA polymerase II core promoter proximal region sequence-specific DNA binding|zinc ion binding|	20	-1.67795	-4.73637	4.18594e-07	7.00698e-06
TFAM	ENSG00000108064	7019	transcription factor A, mitochondrial	nucleus|mitochondrion|mitochondrial matrix|mitochondrial nucleoid|	DNA-dependent DNA replication|regulation of transcription from RNA polymerase I promoter|transcription from mitochondrial promoter|transcription from mitochondrial promoter|transcription initiation from mitochondrial promoter|transcription initiation from mitochondrial promoter|gene expression|mitochondrial respiratory chain complex assembly|positive regulation of transcription, DNA-templated|	chromatin binding|sequence-specific DNA binding transcription factor activity|protein binding|DNA binding, bending|heat shock protein binding|poly(A) RNA binding|mitochondrial light strand promoter sense binding|	20	-1.75869	-4.73587	9.04984e-11	7.63138e-09
MRPS18B	ENSG00000204568	28973	mitochondrial ribosomal protein S18B	nucleus|mitochondrion|mitochondrial small ribosomal subunit|cell junction|	translation|	structural constituent of ribosome|	20	-2.53801	-4.73359	1.59724e-09	7.01032e-08
SNRPD1	ENSG00000167088	6632	small nuclear ribonucleoprotein D1 polypeptide	nucleus|nucleoplasm|U1 snRNP|U4 snRNP|U12-type spliceosomal complex|cytosol|cytosol|small nuclear ribonucleoprotein complex|methylosome|pICln-Sm protein complex|SMN-Sm protein complex|catalytic step 2 spliceosome|	spliceosomal complex assembly|spliceosomal snRNP assembly|spliceosomal snRNP assembly|mRNA splicing, via spliceosome|mRNA splicing, via spliceosome|RNA splicing|gene expression|RNA metabolic process|ncRNA metabolic process|	RNA binding|protein binding|poly(A) RNA binding|	12	-2.61606	-4.73108	9.93694e-07	1.43902e-05
ZC3H3	ENSG00000014164	23144	zinc finger CCCH-type containing 3	nucleus|	mRNA polyadenylation|regulation of mRNA export from nucleus|poly(A)+ mRNA export from nucleus|	molecular_function|metal ion binding|	16	-1.5621	-4.72856	1.01249e-06	1.462e-05
MTERFD2	ENSG00000122085						20	-2.42449	-4.72503	6.41929e-06	7.02428e-05
CCDC6	ENSG00000108091	8030	coiled-coil domain containing 6	cytoplasm|cytoskeleton|	biological_process|	structural constituent of cytoskeleton|protein binding|SH3 domain binding|	20	-1.49239	-4.72189	6.56911e-08	1.42593e-06
MRPL22	ENSG00000082515	29093	mitochondrial ribosomal protein L22	mitochondrion|large ribosomal subunit|	translation|	structural constituent of ribosome|poly(A) RNA binding|	20	-1.85062	-4.72083	2.76577e-08	6.86072e-07
MRPL13	ENSG00000172172	28998	mitochondrial ribosomal protein L13	mitochondrial ribosome|mitochondrial large ribosomal subunit|mitochondrial large ribosomal subunit|	translation|	structural constituent of ribosome|protein binding|poly(A) RNA binding|	20	-3.13305	-4.71953	6.0475e-09	1.98306e-07
GTPBP8	ENSG00000163607	29083	GTP binding protein 8 (putative)	mitochondrion|	barrier septum assembly|	GTP binding|metal ion binding|	20	-3.67947	-4.71883	1.57087e-10	1.15758e-08
SLC1A5	ENSG00000105281	6510	solute carrier family 1 member 5	Golgi apparatus|plasma membrane|plasma membrane|integral component of plasma membrane|membrane|melanosome|extracellular vesicular exosome|	amino acid transmembrane transport|ion transport|dicarboxylic acid transport|extracellular amino acid transport|amino acid transport|glutamine transport|response to virus|neutral amino acid transport|L-serine transport|transmembrane transport|	virus receptor activity|receptor activity|protein binding|neutral amino acid transmembrane transporter activity|L-glutamine transmembrane transporter activity|L-serine transmembrane transporter activity|sodium:dicarboxylate symporter activity|	20	-1.83347	-4.71816	9.51271e-08	1.96046e-06
PSMG1	ENSG00000183527	8624	proteasome assembly chaperone 1	nucleus|cytoplasm|endoplasmic reticulum|	proteasome assembly|	protein binding|	20	-1.99721	-4.71498	2.25796e-07	4.09922e-06
MED20	ENSG00000124641	9477	mediator complex subunit 20	nucleoplasm|mediator complex|	transcription, DNA-templated|regulation of transcription from RNA polymerase II promoter|transcription from RNA polymerase II promoter|transcription initiation from RNA polymerase II promoter|gene expression|	RNA polymerase II transcription cofactor activity|DNA-directed RNA polymerase activity|protein binding|	20	-1.76952	-4.71122	2.73451e-10	1.6973e-08
TRA2A	ENSG00000164548	29896	transformer 2 alpha homolog	nucleus|nucleolus|intracellular membrane-bounded organelle|	mRNA splicing, via spliceosome|	nucleotide binding|poly(A) RNA binding|	20	-2.44156	-4.70704	4.04761e-06	4.74081e-05
RPL10A	ENSG00000198755	4736	ribosomal protein L10a	nucleus|nucleolus|cytoplasm|cytosol|membrane|cytosolic large ribosomal subunit|extracellular vesicular exosome|	nuclear-transcribed mRNA catabolic process, nonsense-mediated decay|translation|translation|translational initiation|translational elongation|translational termination|SRP-dependent cotranslational protein targeting to membrane|anatomical structure morphogenesis|gene expression|viral process|RNA metabolic process|mRNA metabolic process|viral life cycle|viral transcription|cellular protein metabol…	structural constituent of ribosome|protein binding|poly(A) RNA binding|	18	-2.9329	-4.70234	6.2781e-06	6.89624e-05
ACAD9	ENSG00000177646	28976	acyl-CoA dehydrogenase family member 9	nucleus|mitochondrion|dendrite|	oxidation-reduction process|	acyl-CoA dehydrogenase activity|flavin adenine dinucleotide binding|	20	-2.579	-4.70153	3.91118e-09	1.42011e-07
TUBD1	ENSG00000108423	51174	tubulin delta 1	nucleus|cytoplasm|centriole|microtubule|	GTP catabolic process|microtubule-based process|multicellular organismal development|spermatogenesis|cell differentiation|protein polymerization|	GTPase activity|structural constituent of cytoskeleton|GTP binding|	20	-2.56633	-4.69643	3.45314e-09	1.28768e-07
NDUFS2	ENSG00000158864	4720	NADH:ubiquinone oxidoreductase core subunit S2	nucleus|mitochondrion|mitochondrion|mitochondrial inner membrane|mitochondrial respiratory chain complex I|mitochondrial respiratory chain complex I|mitochondrial respiratory chain complex I|	mitochondrial electron transport, NADH to ubiquinone|response to oxidative stress|respiratory electron transport chain|cellular metabolic process|small molecule metabolic process|	NADH dehydrogenase activity|protein binding|NADH dehydrogenase (ubiquinone) activity|electron carrier activity|metal ion binding|quinone binding|NAD binding|4 iron, 4 sulfur cluster binding|	20	-2.52092	-4.69606	7.91776e-10	3.99287e-08
UBE2G2	ENSG00000184787	7327	ubiquitin conjugating enzyme E2 G2	endoplasmic reticulum|cytosol|	ubiquitin-dependent protein catabolic process|protein N-linked glycosylation via asparagine|ER-associated ubiquitin-dependent protein catabolic process|protein K48-linked ubiquitination|	ubiquitin-protein transferase activity|protein binding|ATP binding|acid-amino acid ligase activity|	20	-1.96529	-4.69239	2.55033e-08	6.46322e-07
TOP2A	ENSG00000131747	7153	topoisomerase (DNA) II alpha	nuclear chromosome|condensed chromosome|nucleus|nucleoplasm|nucleoplasm|nucleolus|centriole|DNA topoisomerase complex (ATP-hydrolyzing)|viral integration complex|protein complex|	mitotic cell cycle|resolution of meiotic recombination intermediates|sister chromatid segregation|ATP catabolic process|ATP catabolic process|DNA replication|DNA topological change|DNA ligation|DNA unwinding involved in DNA replication|DNA repair|mitotic recombination|cellular response to DNA damage stimulus|chromosome segregation|apoptotic chromosome condensation|embryonic cleavage|positive regu…	magnesium ion binding|DNA binding|chromatin binding|DNA topoisomerase type II (ATP-hydrolyzing) activity|protein kinase C binding|protein binding|ATP binding|protein C-terminus binding|DNA-dependent ATPase activity|drug binding|DNA binding, bending|enzyme binding|protein homodimerization activity|histone deacetylase binding|ubiquitin binding|poly(A) RNA binding|protein heterodimerization activity|	18	-1.89374	-4.68848	2.65417e-06	3.30241e-05
DHX37	ENSG00000150990	57647	DEAH-box helicase 37		metabolic process|	nucleic acid binding|helicase activity|ATP binding|	18	-2.73618	-4.68653	1.36543e-07	2.66547e-06
UAP1	ENSG00000117143	6675	UDP-N-acetylglucosamine pyrophosphorylase 1	cytosol|	UDP-N-acetylglucosamine biosynthetic process|UDP-N-acetylglucosamine biosynthetic process|dolichol-linked oligosaccharide biosynthetic process|protein N-linked glycosylation via asparagine|post-translational protein modification|cellular protein metabolic process|	UDP-N-acetylglucosamine diphosphorylase activity|carbohydrate binding|	20	-1.88397	-4.68504	4.02399e-08	9.37985e-07
NOB1	ENSG00000141101	28987	NIN1/PSMD8 binding protein 1 homolog	nucleus|	visual perception|	metal ion binding|	20	-2.82715	-4.68504	2.72027e-12	6.10379e-10
RAD51D	ENSG00000185379	5892	RAD51 paralog D	chromosome, telomeric region|nucleus|replication fork|cytoplasm|centrosome|Rad51B-Rad51C-Rad51D-XRCC2 complex|	telomere maintenance|double-strand break repair via homologous recombination|ATP catabolic process|ATP catabolic process|DNA repair|reciprocal meiotic recombination|strand invasion|	four-way junction DNA binding|DNA binding|single-stranded DNA binding|protein binding|ATP binding|DNA-dependent ATPase activity|gamma-tubulin binding|	20	-2.32398	-4.68232	2.18696e-11	2.59503e-09
MBTD1	ENSG00000011258	54799	mbt domain containing 1	nucleus|	transcription, DNA-templated|regulation of transcription, DNA-templated|chromatin modification|embryonic skeletal system development|	zinc ion binding|	20	-1.9347	-4.68143	4.97955e-07	8.13761e-06
LARP1	ENSG00000155506	23367	La ribonucleoprotein domain family member 1	nucleus|cytoplasm|membrane|TORC1 complex|	translational initiation|cell proliferation|positive regulation of macroautophagy|TOR signaling|positive regulation of translation|	RNA cap binding|mRNA 3'-UTR binding|protein binding|eukaryotic initiation factor 4E binding|translation activator activity|translation initiation factor binding|poly(A) RNA binding|mRNA 5'-UTR binding|	20	-1.56566	-4.67967	1.404e-08	3.9324e-07
RPL6	ENSG00000089009	6128	ribosomal protein L6	nucleus|cytosol|membrane|cytosolic large ribosomal subunit|cytoplasmic ribonucleoprotein granule|	nuclear-transcribed mRNA catabolic process, nonsense-mediated decay|regulation of transcription, DNA-templated|translation|translation|translational initiation|translational elongation|translational termination|SRP-dependent cotranslational protein targeting to membrane|gene expression|viral process|RNA metabolic process|mRNA metabolic process|viral life cycle|viral transcription|cellular protein…	DNA binding|RNA binding|structural constituent of ribosome|poly(A) RNA binding|	18	-2.78722	-4.6734	1.52714e-11	1.99326e-09
MADCAM1	ENSG00000099866	8174	mucosal vascular addressin cell adhesion molecule 1	plasma membrane|membrane|integral component of membrane|	positive regulation of leukocyte migration|immune response|cell adhesion|signal transduction|aging|embryo development|extracellular matrix organization|keratinocyte differentiation|regulation of immune response|leukocyte migration|		20	-1.57432	-4.67109	1.26516e-06	1.75942e-05
ARAP1	ENSG00000186635	116985	ArfGAP with RhoGAP domain, ankyrin repeat and PH domain 1	Golgi apparatus|trans-Golgi network|cytosol|plasma membrane|cytoplasmic vesicle|Golgi cisterna membrane|	positive regulation of receptor recycling|small GTPase mediated signal transduction|regulation of cell shape|actin filament reorganization involved in cell cycle|regulation of ARF GTPase activity|positive regulation of Cdc42 GTPase activity|regulation of small GTPase mediated signal transduction|regulation of cellular component movement|positive regulation of filopodium assembly|negative regulati…	Rho GTPase activator activity|protein binding|phosphatidylinositol-3,4,5-trisphosphate binding|ARF GTPase activator activity|zinc ion binding|type 1 angiotensin receptor binding|	18	-1.73963	-4.67107	0.000559385	0.00312124
PPP1R1A	ENSG00000135447	5502	protein phosphatase 1 regulatory inhibitor subunit 1A	extracellular space|cytoplasm|	glycogen metabolic process|signal transduction|negative regulation of catalytic activity|negative regulation of catalytic activity|	protein serine/threonine phosphatase inhibitor activity|protein binding|	20	-1.20788	-4.66945	2.62273e-08	6.57989e-07
COX7C	ENSG00000127184	1350	cytochrome c oxidase subunit 7C	mitochondrion|mitochondrial inner membrane|integral component of membrane|	generation of precursor metabolites and energy|respiratory electron transport chain|cellular metabolic process|small molecule metabolic process|hydrogen ion transmembrane transport|	cytochrome-c oxidase activity|	20	-2.59389	-4.66055	6.27293e-11	5.70291e-09
JMJD6	ENSG00000070495	23210	arginine demethylase and lysine hydroxylase	nucleus|nucleoplasm|nucleolus|plasma membrane|	kidney development|sprouting angiogenesis|transcription, DNA-templated|regulation of transcription, DNA-templated|mRNA processing|cell surface receptor signaling pathway|heart development|RNA splicing|peptidyl-lysine hydroxylation to 5-hydroxy-L-lysine|lung development|T cell differentiation in thymus|macrophage activation|recognition of apoptotic cell|regulation of mRNA splicing, via spliceosome…	RNA binding|single-stranded RNA binding|receptor activity|iron ion binding|protein binding|histone demethylase activity (H3-R2 specific)|histone demethylase activity (H4-R3 specific)|identical protein binding|identical protein binding|peptidyl-lysine 5-dioxygenase activity|	20	-2.56199	-4.65707	5.76635e-06	6.44039e-05
TFB2M	ENSG00000162851	64216	transcription factor B2, mitochondrial	mitochondrial matrix|mitochondrial matrix|mitochondrial nucleoid|	transcription from mitochondrial promoter|transcription from mitochondrial promoter|transcription initiation from mitochondrial promoter|transcription initiation from mitochondrial promoter|gene expression|rRNA methylation|positive regulation of transcription, DNA-templated|	rRNA (adenine-N6,N6-)-dimethyltransferase activity|transcription cofactor activity|poly(A) RNA binding|	20	-3.29987	-4.6526	0.000106181	0.000769107
NCOR1	ENSG00000141027	9611	nuclear receptor corepressor 1	histone deacetylase complex|nuclear chromatin|nucleus|nucleus|nucleoplasm|transcription factor complex|cytoplasm|spindle microtubule|membrane|Sin3 complex|transcriptional repressor complex|	negative regulation of transcription from RNA polymerase II promoter|negative regulation of transcription from RNA polymerase II promoter|CD4-positive, CD25-positive, alpha-beta regulatory T cell differentiation|transcription, DNA-templated|transcription from RNA polymerase II promoter|transcription initiation from RNA polymerase II promoter|transforming growth factor beta receptor signaling path…	RNA polymerase II activating transcription factor binding|chromatin binding|sequence-specific DNA binding transcription factor activity|transcription corepressor activity|transcription corepressor activity|protein binding|histone deacetylase regulator activity|nuclear hormone receptor binding|histone deacetylase binding|sequence-specific DNA binding|transcription regulatory region DNA binding|ret…	20	-1.25468	-4.6498	3.29521e-09	1.24396e-07
GADD45GIP1	ENSG00000179271	90480	GADD45G interacting protein 1	nucleus|mitochondrion|	cell cycle|viral process|	protein binding|	20	-3.21199	-4.64043	7.14823e-09	2.26948e-07
CDK2	ENSG00000123374	1017	cyclin dependent kinase 2	cyclin-dependent protein kinase holoenzyme complex|chromosome, telomeric region|condensed chromosome|X chromosome|Y chromosome|nucleus|nucleoplasm|transcription factor complex|cytoplasm|endosome|centrosome|cytosol|Cajal body|	G1/S transition of mitotic cell cycle|mitotic G2 phase|G2/M transition of mitotic cell cycle|G2/M transition of mitotic cell cycle|mitotic cell cycle|DNA replication|DNA repair|potassium ion transport|DNA damage response, signal transduction by p53 class mediator resulting in cell cycle arrest|mitotic nuclear division|meiotic nuclear division|Ras protein signal transduction|blood coagulation|posi…	cyclin-dependent protein serine/threonine kinase activity|cyclin-dependent protein serine/threonine kinase activity|protein binding|ATP binding|cyclin binding|histone kinase activity|metal ion binding|	20	-3.55035	-4.63931	1.32408e-07	2.59743e-06
SDHD	ENSG00000204370	6392	succinate dehydrogenase complex subunit D	mitochondrion|mitochondrial envelope|mitochondrial inner membrane|mitochondrial inner membrane|mitochondrial inner membrane|mitochondrial respiratory chain complex II|integral component of membrane|	tricarboxylic acid cycle|tricarboxylic acid cycle|tricarboxylic acid cycle|respiratory electron transport chain|cellular metabolic process|small molecule metabolic process|	succinate dehydrogenase activity|electron carrier activity|heme binding|metal ion binding|ubiquinone binding|	20	-3.03357	-4.63914	1.5362e-12	4.34699e-10
ZBTB9	ENSG00000213588	221504	zinc finger and BTB domain containing 9	nucleus|	transcription, DNA-templated|regulation of transcription, DNA-templated|	DNA binding|metal ion binding|	20	-1.37194	-4.63083	9.45836e-08	1.95532e-06
NUBP1	ENSG00000103274	4682	nucleotide binding protein 1	cytoplasm|cytosol|plasma membrane|extracellular vesicular exosome|	cellular iron ion homeostasis|negative regulation of centrosome duplication|cell growth|iron-sulfur cluster assembly|small molecule metabolic process|centrosome localization|protein localization to cell cortex|	nucleotide binding|protein binding|ATP binding|nucleoside-triphosphatase activity|metal ion binding|iron-sulfur cluster binding|4 iron, 4 sulfur cluster binding|	20	-2.01485	-4.6292	1.36357e-09	6.13301e-08
ACIN1	ENSG00000100813	22985	apoptotic chromatin condensation inducer 1	nucleus|cytoplasm|cytosol|plasma membrane|nuclear speck|exon-exon junction complex|ASAP complex|	ATP catabolic process|mRNA processing|apoptotic process|cellular component disassembly involved in execution phase of apoptosis|RNA splicing|erythrocyte differentiation|apoptotic chromosome condensation|positive regulation of apoptotic process|positive regulation of monocyte differentiation|negative regulation of mRNA splicing, via spliceosome|	nucleotide binding|nucleic acid binding|protein binding|ATPase activity|enzyme binding|poly(A) RNA binding|	20	-1.79859	-4.62907	1.25461e-07	2.47086e-06
SZRD1	ENSG00000055070	26099	SUZ RNA binding domain containing 1				20	-1.69785	-4.62845	6.96189e-08	1.49654e-06
COMMD3-BMI1	ENSG00000269897	100532731	COMMD3-BMI1 readthrough				20	-1.50485	-4.62787	1.38449e-08	3.88865e-07
JUNB	ENSG00000171223	3726	JunB proto-oncogene, AP-1 transcription factor subunit	chromatin|nucleus|nucleoplasm|	vasculogenesis|osteoblast differentiation|trophectodermal cell differentiation|transcription, DNA-templated|regulation of transcription from RNA polymerase II promoter|transcription initiation from RNA polymerase II promoter|transforming growth factor beta receptor signaling pathway|response to light stimulus|response to mechanical stimulus|gene expression|osteoclast differentiation|response to p…	RNA polymerase II regulatory region sequence-specific DNA binding|DNA binding|double-stranded DNA binding|sequence-specific DNA binding transcription factor activity|transcription coactivator activity|transcription corepressor activity|protein binding|	18	-1.58204	-4.62599	1.30967e-08	3.7098e-07
SMG7	ENSG00000116698	9887	SMG7, nonsense mediated mRNA decay factor	nucleus|cytoplasm|cytosol|intermediate filament cytoskeleton|	nuclear-transcribed mRNA catabolic process, nonsense-mediated decay|mRNA export from nucleus|gene expression|RNA metabolic process|mRNA metabolic process|regulation of dephosphorylation|	protein binding|protein phosphatase 2A binding|	20	-2.72953	-4.62567	1.18623e-07	2.36728e-06
NDUFB6	ENSG00000165264	4712	NADH:ubiquinone oxidoreductase subunit B6	mitochondrial inner membrane|mitochondrial respiratory chain complex I|mitochondrial respiratory chain complex I|integral component of membrane|mitochondrial membrane|	mitochondrial electron transport, NADH to ubiquinone|respiratory electron transport chain|cellular metabolic process|small molecule metabolic process|	NADH dehydrogenase (ubiquinone) activity|	20	-3.76463	-4.62362	3.96831e-10	2.30482e-08
COPA	ENSG00000122218	1314	coatomer protein complex subunit alpha	extracellular space|cytoplasm|cytosol|membrane|COPI vesicle coat|COPI vesicle coat|extracellular vesicular exosome|	intracellular protein transport|retrograde vesicle-mediated transport, Golgi to ER|pancreatic juice secretion|COPI coating of Golgi vesicle|membrane organization|	hormone activity|structural molecule activity|	16	-1.85879	-4.61923	4.0911e-08	9.51098e-07
PGLS	ENSG00000130313	25796	6-phosphogluconolactonase	cytosol|extracellular vesicular exosome|	carbohydrate metabolic process|pentose-phosphate shunt|pentose-phosphate shunt|pentose-phosphate shunt, oxidative branch|small molecule metabolic process|	6-phosphogluconolactonase activity|monosaccharide binding|	20	-1.94084	-4.61862	3.71854e-09	1.37796e-07
DBNDD1	ENSG00000003249	79007	dysbindin domain containing 1	cytoplasm|			20	-1.50548	-4.61825	9.2539e-09	2.81279e-07
RP11-318A15.7	ENSG00000267168						12	-1.60364	-4.61799	1.18386e-06	1.66843e-05
APC2	ENSG00000115266	10297	APC2, WNT signaling pathway regulator	Golgi membrane|cytoplasm|Golgi apparatus|cytoplasmic microtubule|actin filament|microtubule cytoskeleton|catenin complex|lamellipodium membrane|perinuclear region of cytoplasm|	Wnt signaling pathway|negative regulation of catenin import into nucleus|negative regulation of canonical Wnt signaling pathway|	protein binding|beta-catenin binding|microtubule binding|	20	-1.48921	-4.6178	6.32626e-10	3.35107e-08
GAPDH	ENSG00000111640	2597	glyceraldehyde-3-phosphate dehydrogenase	nucleus|nucleus|cytoplasm|cytoplasm|lipid particle|cytosol|cytosol|plasma membrane|microtubule cytoskeleton|membrane|ribonucleoprotein complex|perinuclear region of cytoplasm|extracellular vesicular exosome|GAIT complex|	microtubule cytoskeleton organization|carbohydrate metabolic process|glucose metabolic process|gluconeogenesis|glycolytic process|glycolytic process|negative regulation of translation|negative regulation of translation|peptidyl-cysteine S-trans-nitrosylation|small molecule metabolic process|protein stabilization|neuron apoptotic process|oxidation-reduction process|cellular response to interferon-…	glyceraldehyde-3-phosphate dehydrogenase (NAD+) (phosphorylating) activity|glyceraldehyde-3-phosphate dehydrogenase (NAD+) (phosphorylating) activity|protein binding|microtubule binding|peptidyl-cysteine S-nitrosylase activity|identical protein binding|NADP binding|NAD binding|	20	-2.67624	-4.61678	6.87229e-09	2.18883e-07
DKFZP779L1853	ENSG00000269514	643162	uncharacterized LOC643162				20	-1.39331	-4.61613	6.0936e-09	1.9949e-07
TADA2B	ENSG00000173011	93624	transcriptional adaptor 2B	STAGA complex|SAGA-type complex|	chromatin organization|transcription, DNA-templated|regulation of transcription, DNA-templated|	DNA binding|chromatin binding|zinc ion binding|	18	-1.63427	-4.61368	3.85701e-06	4.54958e-05
CCDC94	ENSG00000105248	55702	coiled-coil domain containing 94				20	-2.68998	-4.61285	4.83033e-09	1.66601e-07
OBFC1	ENSG00000107960						20	-2.44567	-4.61184	3.26929e-09	1.23651e-07
RPS15	ENSG00000115268	6209	ribosomal protein S15	nucleus|nucleoplasm|cytosol|membrane|cytosolic small ribosomal subunit|	ribosomal small subunit export from nucleus|nuclear-transcribed mRNA catabolic process, nonsense-mediated decay|osteoblast differentiation|rRNA processing|translation|translation|translational initiation|translational elongation|translational termination|SRP-dependent cotranslational protein targeting to membrane|gene expression|viral process|RNA metabolic process|mRNA metabolic process|viral lif…	DNA binding|structural constituent of ribosome|protein binding|poly(A) RNA binding|	20	-1.43062	-4.61127	5.60145e-11	5.22714e-09
HIST1H4B	ENSG00000124529	8366	histone cluster 1 H4 family member b				20	-1.95237	-4.60996	4.99231e-07	8.15179e-06
RPL30	ENSG00000156482	6156	ribosomal protein L30	nucleus|cytoplasm|cytosol|membrane|cytosolic large ribosomal subunit|cytosolic large ribosomal subunit|extracellular vesicular exosome|	nuclear-transcribed mRNA catabolic process, nonsense-mediated decay|translation|translation|translational initiation|translational elongation|translational termination|SRP-dependent cotranslational protein targeting to membrane|gene expression|viral process|RNA metabolic process|mRNA metabolic process|viral life cycle|viral transcription|cellular protein metabolic process|	RNA binding|structural constituent of ribosome|structural constituent of ribosome|protein binding|poly(A) RNA binding|	16	-1.71808	-4.60909	3.84696e-07	6.51049e-06
TIMM23	ENSG00000138297	100287932	translocase of inner mitochondrial membrane 23	mitochondrion|mitochondrial inner membrane|mitochondrial inner membrane presequence translocase complex|mitochondrial intermembrane space|integral component of mitochondrial inner membrane|	protein targeting to mitochondrion|cellular protein metabolic process|protein transmembrane transport|	protein binding|P-P-bond-hydrolysis-driven protein transmembrane transporter activity|	20	-1.93044	-4.60815	4.28254e-09	1.51367e-07
XRCC6	ENSG00000196419	2547	X-ray repair cross complementing 6	nuclear telomere cap complex|nucleus|nucleoplasm|transcription factor complex|nucleolus|cytosol|membrane|Ku70:Ku80 complex|nonhomologous end joining complex|	telomere maintenance|DNA ligation|DNA repair|double-strand break repair|double-strand break repair via nonhomologous end joining|double-strand break repair via nonhomologous end joining|transcription, DNA-templated|brain development|viral process|positive regulation of type I interferon production|DNA duplex unwinding|DNA duplex unwinding|V(D)J recombination|innate immune response|negative regula…	DNA binding|damaged DNA binding|double-stranded DNA binding|double-stranded telomeric DNA binding|ATP-dependent DNA helicase activity|protein binding|ATP binding|protein C-terminus binding|transcription regulatory region DNA binding|poly(A) RNA binding|5'-deoxyribose-5-phosphate lyase activity|	20	-2.66065	-4.60401	5.67741e-08	1.25836e-06
LCMT1	ENSG00000205629	51451	leucine carboxyl methyltransferase 1		cellular protein modification process|protein methylation|C-terminal protein methylation|negative regulation of protein complex assembly|regulation of apoptotic process|regulation of mitotic cell cycle spindle assembly checkpoint|	protein C-terminal carboxyl O-methyltransferase activity|protein binding|S-adenosylmethionine-dependent methyltransferase activity|	20	-2.70068	-4.6021	9.54234e-09	2.88728e-07
NFRKB	ENSG00000170322	4798	nuclear factor related to kappaB binding protein	nucleus|Ino80 complex|Ino80 complex|	DNA repair|DNA recombination|regulation of transcription, DNA-templated|transcription from RNA polymerase II promoter|inflammatory response|	protease binding|DNA binding|protein binding|	20	-1.5284	-4.60077	1.15921e-10	9.3722e-09
RRAGC	ENSG00000116954	64121	Ras related GTP binding C	nucleus|cytoplasm|lysosome|intracellular membrane-bounded organelle|	GTP catabolic process|transcription, DNA-templated|apoptotic process|small GTPase mediated signal transduction|RNA splicing|cell growth|cellular protein localization|cellular response to amino acid stimulus|	magnesium ion binding|GTPase activity|protein binding|GTP binding|GDP binding|protein heterodimerization activity|	20	-1.95619	-4.6001	1.42475e-07	2.76774e-06
CYC1	ENSG00000179091	1537	cytochrome c1	nucleus|mitochondrion|mitochondrial inner membrane|membrane|integral component of membrane|respiratory chain|	respiratory electron transport chain|response to glucagon|cellular metabolic process|small molecule metabolic process|	iron ion binding|heme binding|electron transporter, transferring electrons from CoQH2-cytochrome c reductase complex and cytochrome c oxidase complex activity|	20	-2.91013	-4.59699	1.73328e-10	1.24063e-08
MRPL17	ENSG00000158042	63875	mitochondrial ribosomal protein L17	mitochondrial inner membrane|ribosome|	translation|	structural constituent of ribosome|protein domain specific binding|	20	-2.73981	-4.59583	6.27326e-08	1.37516e-06
ARFGAP1	ENSG00000101199	55738	ADP ribosylation factor GTPase activating protein 1	cytosol|Golgi-associated vesicle membrane|synapse|	retrograde vesicle-mediated transport, Golgi to ER|activation of signaling protein activity involved in unfolded protein response|protein transport|endoplasmic reticulum unfolded protein response|regulation of ARF GTPase activity|positive regulation of GTPase activity|positive regulation of GTPase activity|cellular protein metabolic process|COPI coating of Golgi vesicle|membrane organization|	GTPase activator activity|protein binding|ARF GTPase activator activity|zinc ion binding|	20	-1.48374	-4.59512	1.42901e-07	2.77062e-06
GRSF1	ENSG00000132463	2926	G-rich RNA sequence binding factor 1	cytoplasm|mitochondrion|mitochondrial nucleoid|	mRNA polyadenylation|tRNA processing|anterior/posterior pattern specification|morphogenesis of embryonic epithelium|	nucleotide binding|RNA binding|mRNA binding|poly(A) RNA binding|	20	-4.00647	-4.59321	2.40091e-12	5.70787e-10
NUDT5	ENSG00000165609	11164	nudix hydrolase 5	intracellular|nucleus|cytosol|extracellular vesicular exosome|	nucleotide metabolic process|ribonucleoside diphosphate catabolic process|D-ribose catabolic process|nucleobase-containing small molecule catabolic process|small molecule metabolic process|nucleobase-containing small molecule metabolic process|	magnesium ion binding|nucleoside-diphosphatase activity|ADP-sugar diphosphatase activity|snoRNA binding|ADP-ribose diphosphatase activity|	20	-1.95443	-4.59314	1.98713e-05	0.000184059
NDUFC1	ENSG00000109390	4717	NADH:ubiquinone oxidoreductase subunit C1	mitochondrion|mitochondrial inner membrane|mitochondrial respiratory chain complex I|integral component of membrane|	mitochondrial electron transport, NADH to ubiquinone|respiratory electron transport chain|cellular metabolic process|small molecule metabolic process|	NADH dehydrogenase (ubiquinone) activity|	20	-1.76101	-4.59248	1.94754e-09	8.15355e-08
HNRNPF	ENSG00000169813	3185	heterogeneous nuclear ribonucleoprotein F	nucleus|nucleoplasm|membrane|catalytic step 2 spliceosome|	mRNA splicing, via spliceosome|mRNA splicing, via spliceosome|RNA processing|RNA splicing|gene expression|regulation of RNA splicing|regulation of RNA splicing|	nucleotide binding|RNA binding|single-stranded RNA binding|protein binding|poly(A) RNA binding|	20	-1.45096	-4.58942	1.48085e-07	2.85206e-06
CDAN1	ENSG00000140326	146059	codanin 1	nucleus|cytoplasm|plasma membrane|endomembrane system|integral component of membrane|	chromatin organization|protein localization|negative regulation of DNA replication|chromatin assembly|	protein binding|	20	-3.6037	-4.58921	4.3972e-13	2.12261e-10
KDM8	ENSG00000155666	79831	lysine demethylase 8	nucleus|	G2/M transition of mitotic cell cycle|transcription, DNA-templated|positive regulation of transcription, DNA-templated|oxidation-reduction process|histone H3-K36 demethylation|	chromatin binding|metal ion binding|histone demethylase activity (H3-K36 specific)|	20	-2.25305	-4.58918	3.0517e-08	7.45018e-07
TARS2	ENSG00000143374	80222	threonyl-tRNA synthetase 2, mitochondrial (putative)	cellular_component|mitochondrial matrix|	tRNA aminoacylation for protein translation|gene expression|mitochondrial threonyl-tRNA aminoacylation|	molecular_function|threonine-tRNA ligase activity|ATP binding|	18	-2.77491	-4.5879	2.13745e-10	1.4181e-08
TMEM79	ENSG00000163472	84283	transmembrane protein 79	lysosomal membrane|integral component of membrane|trans-Golgi network membrane|	epithelial cell maturation|regulated secretory pathway|positive regulation of epidermis development|establishment of skin barrier|		18	-1.4389	-4.58656	2.02593e-06	2.62569e-05
RPS3A	ENSG00000145425	6189	ribosomal protein S3A	nucleus|nucleus|nucleolus|cytoplasm|cytosol|cytosol|cytosolic small ribosomal subunit|ribonucleoprotein complex|extracellular vesicular exosome|	nuclear-transcribed mRNA catabolic process, nonsense-mediated decay|cytoplasmic translation|translation|translation|translation|translation|translational initiation|translational elongation|translational termination|SRP-dependent cotranslational protein targeting to membrane|gene expression|viral process|RNA metabolic process|mRNA metabolic process|viral life cycle|viral transcription|cell differ…	RNA binding|structural constituent of ribosome|protein binding|poly(A) RNA binding|	12	-2.6156	-4.58493	0.000162691	0.0010954
TUBA1B	ENSG00000123416	10376	tubulin alpha 1b	microtubule|microtubule|cytoplasmic microtubule|extracellular vesicular exosome|	microtubule cytoskeleton organization|GTP catabolic process|protein folding|microtubule-based process|cytoskeleton-dependent intracellular transport|cellular protein metabolic process|'de novo' posttranslational protein folding|protein polymerization|cell division|cellular response to interleukin-4|	double-stranded RNA binding|GTPase activity|structural molecule activity|structural constituent of cytoskeleton|protein binding|GTP binding|	16	-2.48047	-4.58105	3.01447e-08	7.37732e-07
PHB	ENSG00000167085	5245	prohibitin	nucleus|nucleus|nucleoplasm|cytoplasm|mitochondrion|mitochondrial inner membrane|integral component of plasma membrane|membrane|extracellular vesicular exosome|	negative regulation of transcription from RNA polymerase II promoter|osteoblast differentiation|DNA replication|regulation of transcription, DNA-templated|transcription from RNA polymerase II promoter|signal transduction|negative regulation of cell proliferation|negative regulation of transcription by competitive promoter binding|histone deacetylation|negative regulation of cell growth|regulation…	sequence-specific DNA binding RNA polymerase II transcription factor activity|protein binding|enzyme binding|histone deacetylase binding|transcription regulatory region DNA binding|	18	-2.43804	-4.57944	4.29048e-09	1.5138e-07
OGFR	ENSG00000060491	11054	opioid growth factor receptor	cellular_component|nucleus|cytoplasm|membrane|	regulation of cell growth|opioid receptor signaling pathway|	opioid receptor activity|	20	-1.57987	-4.57914	1.21818e-06	1.70837e-05
COX18	ENSG00000163626	285521	COX18, cytochrome c oxidase assembly factor	integral component of mitochondrial inner membrane|	respiratory chain complex IV assembly|protein transport|protein insertion into mitochondrial membrane|	protein transporter activity|	20	-1.42456	-4.57835	7.90298e-09	2.47759e-07
ZNHIT3	ENSG00000108278	9326	zinc finger HIT-type containing 3	intracellular|	regulation of transcription, DNA-templated|	metal ion binding|thyroid hormone receptor binding|	18	-2.63305	-4.57833	1.40952e-11	1.85641e-09
ALOX12B	ENSG00000179477	242	arachidonate 12-lipoxygenase, 12R type	cytosol|	protein lipidation|sphingolipid metabolic process|positive regulation of gene expression|arachidonic acid metabolic process|arachidonic acid metabolic process|arachidonic acid metabolic process|lipoxygenase pathway|lipoxygenase pathway|lipoxygenase pathway|positive regulation of MAPK cascade|linoleic acid metabolic process|small molecule metabolic process|ceramide biosynthetic process|hepoxilin b…	arachidonate 12-lipoxygenase activity|arachidonate 12-lipoxygenase activity|iron ion binding|protein binding|oxidoreductase activity, acting on single donors with incorporation of molecular oxygen, incorporation of two atoms of oxygen|linoleate 9S-lipoxygenase activity|	20	-1.29988	-4.57599	1.42437e-05	0.000137947
ATP5J2-PTCD1	ENSG00000248919	100526740	ATP5J2-PTCD1 readthrough				20	-2.82092	-4.57578	2.50098e-12	5.76483e-10
CLEC18C	ENSG00000157335	283971	C-type lectin domain family 18 member C	extracellular region|		carbohydrate binding|	16	-1.57127	-4.57467	6.82716e-06	7.40162e-05
SNRPB2	ENSG00000125870	6629	small nuclear ribonucleoprotein polypeptide B2	nucleus|nucleoplasm|spliceosomal complex|U2 snRNP|nucleolus|catalytic step 2 spliceosome|	mRNA splicing, via spliceosome|mRNA splicing, via spliceosome|mRNA processing|RNA splicing|gene expression|	nucleotide binding|protein binding|snRNA binding|	20	-1.97074	-4.57068	1.02515e-08	3.06013e-07
NDUFC2	ENSG00000151366	4718	NADH:ubiquinone oxidoreductase subunit C2	cytoplasm|mitochondrial inner membrane|mitochondrial respiratory chain complex I|mitochondrial respiratory chain complex I|integral component of membrane|	mitochondrial electron transport, NADH to ubiquinone|respiratory electron transport chain|cellular metabolic process|small molecule metabolic process|	NADH dehydrogenase (ubiquinone) activity|	20	-2.43264	-4.57044	1.84277e-10	1.28672e-08
PSMD13	ENSG00000185627	5719	proteasome 26S subunit, non-ATPase 13	proteasome complex|nucleus|nucleoplasm|cytosol|proteasome regulatory particle|membrane|proteasome accessory complex|extracellular vesicular exosome|	G1/S transition of mitotic cell cycle|protein polyubiquitination|mitotic cell cycle|antigen processing and presentation of peptide antigen via MHC class I|antigen processing and presentation of exogenous peptide antigen via MHC class I, TAP-dependent|regulation of cellular amino acid metabolic process|apoptotic process|DNA damage response, signal transduction by p53 class mediator resulting in ce…		20	-2.40503	-4.569	5.94313e-08	1.31125e-06
ELL	ENSG00000105656	8178	elongation factor for RNA polymerase II	nucleoplasm|transcription elongation factor complex|Cajal body|nuclear speck|	in utero embryonic development|transcription from RNA polymerase II promoter|transcription elongation from RNA polymerase II promoter|gene expression|negative regulation of phosphatase activity|viral process|positive regulation of DNA-templated transcription, elongation|positive regulation of viral transcription|	protein binding|phosphatase binding|	20	-2.08987	-4.56755	1.71981e-07	3.22788e-06
RPL35A	ENSG00000182899	6165	ribosomal protein L35a	cytosol|membrane|cytosolic large ribosomal subunit|extracellular vesicular exosome|	nuclear-transcribed mRNA catabolic process, nonsense-mediated decay|rRNA processing|translation|translation|translational initiation|translational elongation|translational termination|SRP-dependent cotranslational protein targeting to membrane|gene expression|viral process|RNA metabolic process|mRNA metabolic process|viral life cycle|viral transcription|ribosomal large subunit biogenesis|cellular…	tRNA binding|structural constituent of ribosome|poly(A) RNA binding|	16	-2.08805	-4.56358	4.45686e-06	5.12398e-05
LRRC37A2	ENSG00000238083	474170	leucine rich repeat containing 37 member A2	integral component of membrane|			20	-1.55216	-4.56324	9.15934e-05	0.00068149
TTC14	ENSG00000163728	151613	tetratricopeptide repeat domain 14			RNA binding|	20	-2.59606	-4.56312	8.87382e-06	9.22009e-05
GPN2	ENSG00000142751	54707	GPN-loop GTPase 2	cellular_component|	biological_process|	molecular_function|GTP binding|	20	-3.9889	-4.56	5.3046e-09	1.79547e-07
WAC	ENSG00000095787	51322	WW domain containing adaptor with coiled-coil	nucleus|nucleus|spliceosomal complex|nuclear speck|	transcription, DNA-templated|cellular response to DNA damage stimulus|histone monoubiquitination|positive regulation of macroautophagy|negative regulation of proteasomal ubiquitin-dependent protein catabolic process|G1 DNA damage checkpoint|positive regulation of transcription, DNA-templated|histone H2B conserved C-terminal lysine ubiquitination|	RNA polymerase II core binding|chromatin binding|protein binding|	20	-2.20829	-4.55956	1.01975e-05	0.000103954
CCND1	ENSG00000110092	595	cyclin D1	cyclin-dependent protein kinase holoenzyme complex|intracellular|nucleus|nucleoplasm|cytosol|tight junction|membrane|transcriptional repressor complex|	G1/S transition of mitotic cell cycle|G1/S transition of mitotic cell cycle|negative regulation of transcription from RNA polymerase II promoter|mitotic cell cycle|re-entry into mitotic cell cycle|liver development|positive regulation of protein phosphorylation|transcription, DNA-templated|protein phosphorylation|cellular response to DNA damage stimulus|Notch signaling pathway|lactation|response …	transcription corepressor activity|protein kinase activity|protein binding|transcription factor binding|cyclin-dependent protein serine/threonine kinase regulator activity|enzyme binding|protein kinase binding|protein complex binding|histone deacetylase binding|proline-rich region binding|	18	-2.63541	-4.5592	1.72388e-10	1.23834e-08
RP11-894J14.5	ENSG00000272305						20	-3.05958	-4.55903	2.72943e-08	6.79636e-07
CHD1	ENSG00000153922	1105	chromodomain helicase DNA binding protein 1	nucleus|cytoplasm|	chromatin remodeling|transcription, DNA-templated|regulation of transcription from RNA polymerase II promoter|DNA duplex unwinding|	DNA binding|ATP-dependent DNA helicase activity|protein binding|ATP binding|methylated histone binding|	20	-1.36703	-4.55879	2.8291e-08	6.96636e-07
MEF2D	ENSG00000116604	4209	myocyte enhancer factor 2D	nucleus|intracellular membrane-bounded organelle|	osteoblast differentiation|endochondral ossification|chondrocyte differentiation|transcription from RNA polymerase II promoter|apoptotic process|nervous system development|adult heart development|muscle organ development|skeletal muscle cell differentiation|positive regulation of transcription from RNA polymerase II promoter|	RNA polymerase II regulatory region sequence-specific DNA binding|sequence-specific DNA binding RNA polymerase II transcription factor activity|sequence-specific DNA binding transcription factor activity|protein binding|activating transcription factor binding|histone deacetylase binding|protein dimerization activity|	18	-1.46873	-4.55756	2.81082e-08	6.94217e-07
FANCL	ENSG00000115392	55120	Fanconi anemia complementation group L	nuclear envelope|nucleoplasm|cytoplasm|Fanconi anaemia nuclear complex|	DNA repair|DNA repair|protein monoubiquitination|cellular response to DNA damage stimulus|gamete generation|regulation of cell proliferation|	ubiquitin-protein transferase activity|ubiquitin-protein transferase activity|ubiquitin-protein transferase activity|zinc ion binding|ligase activity|ubiquitin protein ligase binding|	20	-1.46455	-4.55723	3.15964e-08	7.67616e-07
ORAOV1	ENSG00000149716	220064	oral cancer overexpressed 1	cellular_component|	biological_process|	molecular_function|	20	-2.88475	-4.55321	1.47441e-10	1.09457e-08
UBA5	ENSG00000081307	79876	ubiquitin like modifier activating enzyme 5	nucleus|cytoplasm|cytosol|intracellular membrane-bounded organelle|	response to endoplasmic reticulum stress|oxidation-reduction process|protein ufmylation|protein ufmylation|	protein binding|ATP binding|oxidoreductase activity, acting on the CH-OH group of donors, NAD or NADP as acceptor|metal ion binding|cofactor binding|UFM1 activating enzyme activity|	20	-1.31304	-4.54438	5.94889e-08	1.31125e-06
MRPL15	ENSG00000137547	29088	mitochondrial ribosomal protein L15	mitochondrion|large ribosomal subunit|	translation|	structural constituent of ribosome|poly(A) RNA binding|	20	-3.28694	-4.54002	1.44753e-07	2.79837e-06
HUWE1	ENSG00000086758	10075	HECT, UBA and WWE domain containing 1, E3 ubiquitin protein ligase	nucleus|nucleus|cytoplasm|membrane|extracellular vesicular exosome|	protein polyubiquitination|base-excision repair|protein monoubiquitination|histone ubiquitination|cell differentiation|protein ubiquitination involved in ubiquitin-dependent protein catabolic process|	DNA binding|ubiquitin-protein transferase activity|protein binding|ligase activity|poly(A) RNA binding|	20	-3.09648	-4.53721	2.00886e-11	2.44615e-09
PSMD12	ENSG00000197170	5718	proteasome 26S subunit, non-ATPase 12	nucleoplasm|cytosol|proteasome regulatory particle|membrane|proteasome accessory complex|extracellular vesicular exosome|	G1/S transition of mitotic cell cycle|protein polyubiquitination|mitotic cell cycle|antigen processing and presentation of peptide antigen via MHC class I|antigen processing and presentation of exogenous peptide antigen via MHC class I, TAP-dependent|regulation of cellular amino acid metabolic process|apoptotic process|DNA damage response, signal transduction by p53 class mediator resulting in ce…		20	-2.05757	-4.53249	2.71952e-08	6.78013e-07
HIST1H3A	ENSG00000198366	8350	histone cluster 1 H3 family member a				20	-2.10659	-4.53074	7.08284e-06	7.62914e-05
CELF1	ENSG00000149187	10658	CUGBP Elav-like family member 1	nucleus|nucleus|cytoplasm|membrane|ribonucleoprotein complex|	mRNA splice site selection|mRNA processing|germ cell development|spermatid development|embryo development|RNA interference|negative regulation of translation|positive regulation of multicellular organism growth|regulation of RNA splicing|	nucleotide binding|translation repressor activity, nucleic acid binding|RNA binding|mRNA binding|protein binding|translation initiation factor binding|BRE binding|poly(A) RNA binding|	20	-2.85777	-4.5294	1.01476e-09	4.84803e-08
TMEM258	ENSG00000134825	746	transmembrane protein 258	integral component of membrane|			18	-1.95831	-4.52847	3.93411e-08	9.22114e-07
C19orf24	ENSG00000228300	55009	chromosome 19 open reading frame 24	extracellular region|cytoplasm|integral component of membrane|			18	-2.28213	-4.52791	4.26221e-09	1.50915e-07
PPAT	ENSG00000128059	5471	phosphoribosyl pyrophosphate amidotransferase	cytosol|	G1/S transition of mitotic cell cycle|kidney development|purine nucleobase metabolic process|purine nucleotide biosynthetic process|'de novo' IMP biosynthetic process|glutamine catabolic process|lactation|purine nucleobase biosynthetic process|nucleoside metabolic process|purine ribonucleoside monophosphate biosynthetic process|organ regeneration|cellular response to insulin stimulus|cellular res…	amidophosphoribosyltransferase activity|metal ion binding|4 iron, 4 sulfur cluster binding|	20	-1.38333	-4.52281	5.23412e-08	1.17181e-06
PRPF31	ENSG00000105618	26121	pre-mRNA processing factor 31	nucleus|U2-type spliceosomal complex|U4 snRNP|U4atac snRNP|Cajal body|nuclear speck|U4/U6 x U5 tri-snRNP complex|MLL1 complex|	spliceosomal tri-snRNP complex assembly|spliceosomal tri-snRNP complex assembly|mRNA splicing, via spliceosome|mRNA splicing, via spliceosome|	protein binding|ribonucleoprotein complex binding|poly(A) RNA binding|snRNP binding|	20	-3.65193	-4.52193	7.34235e-09	2.32741e-07
DDX18	ENSG00000088205	8886	DEAD-box helicase 18	nucleolus|membrane|	ATP catabolic process|ATP catabolic process|	ATP-dependent RNA helicase activity|protein binding|ATP binding|poly(A) RNA binding|	20	-1.34008	-4.51996	6.98667e-07	1.08242e-05
DDX10	ENSG00000178105	1662	DEAD-box helicase 10		ATP catabolic process|metabolic process|	RNA helicase activity|ATP binding|ATP-dependent helicase activity|poly(A) RNA binding|	20	-1.95934	-4.51846	3.87416e-08	9.11272e-07
MRPS2	ENSG00000122140	51116	mitochondrial ribosomal protein S2	mitochondrion|small ribosomal subunit|	translation|	structural constituent of ribosome|	20	-3.45765	-4.51274	6.93427e-11	6.07357e-09
PGAM5	ENSG00000247077	192111	PGAM family member 5, mitochondrial serine/threonine protein phosphatase	mitochondrion|mitochondrial outer membrane|integral component of membrane|	dephosphorylation|dephosphorylation|positive regulation of GTPase activity|necroptotic process|	phosphoprotein phosphatase activity|GTPase activator activity|phosphatase activity|protein complex binding|	16	-2.64635	-4.51264	3.25643e-11	3.42268e-09
TTC19	ENSG00000011295	54902	tetratricopeptide repeat domain 19	mitochondrion|mitochondrial inner membrane|centrosome|midbody|	cytokinesis|mitochondrial respiratory chain complex III assembly|	protein binding|	20	-1.32679	-4.51166	3.79259e-08	8.9319e-07
MINOS1	ENSG00000173436	440574	mitochondrial inner membrane organizing system 1	mitochondrion|mitochondrion|mitochondrial inner membrane|integral component of membrane|	biological_process|	molecular_function|	18	-1.85746	-4.51059	4.37531e-07	7.29949e-06
METTL1	ENSG00000037897	4234	methyltransferase like 1	nucleus|nucleolus|cytoplasm|	tRNA modification|tRNA methylation|RNA (guanine-N7)-methylation|RNA (guanine-N7)-methylation|	tRNA binding|protein binding|tRNA (guanine-N7-)-methyltransferase activity|tRNA (guanine-N7-)-methyltransferase activity|	18	-2.60136	-4.51016	3.17352e-11	3.37102e-09
STK11	ENSG00000118046	6794	serine/threonine kinase 11	nucleus|cytoplasm|mitochondrion|cytosol|cytosol|membrane|TCR signalosome|extracellular vesicular exosome|	regulation of cell growth|tissue homeostasis|vasculature development|energy reserve metabolic process|protein phosphorylation|autophagy|cellular response to DNA damage stimulus|cell cycle arrest|cell cycle arrest|spermatid development|axonogenesis|negative regulation of cell proliferation|insulin receptor signaling pathway|response to ionizing radiation|establishment of cell polarity|regulation o…	magnesium ion binding|p53 binding|protein serine/threonine kinase activity|protein serine/threonine kinase activity|protein binding|ATP binding|LRR domain binding|protein kinase activator activity|protein complex binding|	20	-1.50114	-4.50854	4.76676e-08	1.08173e-06
ARPC2	ENSG00000163466	10109	actin related protein 2/3 complex subunit 2	cytoplasm|endosome|Golgi apparatus|cytosol|Arp2/3 protein complex|plasma membrane|focal adhesion|actin cytoskeleton|cell leading edge|neuron projection|synapse|extracellular vesicular exosome|	cellular component movement|positive regulation of lamellipodium assembly|positive regulation of actin filament polymerization|Fc-gamma receptor signaling pathway involved in phagocytosis|innate immune response|positive regulation of substrate adhesion-dependent cell spreading|	actin binding|structural constituent of cytoskeleton|protein binding|kinesin binding|AP-1 adaptor complex binding|Arp2/3 complex binding|	20	-2.04357	-4.50622	1.89129e-10	1.30238e-08
LSM12	ENSG00000161654	124801	LSM12 homolog				20	-2.1086	-4.50596	8.0818e-07	1.22175e-05
MROH6	ENSG00000204839	642475	maestro heat like repeat family member 6				20	-1.69952	-4.50555	6.32217e-07	9.96478e-06
CMTR1	ENSG00000137200	23070	cap methyltransferase 1	nucleus|cytoplasm|	7-methylguanosine mRNA capping|7-methylguanosine mRNA capping|mRNA methylation|cap1 mRNA methylation|	nucleic acid binding|mRNA (nucleoside-2'-O-)-methyltransferase activity|	20	-3.69118	-4.50345	1.72047e-12	4.77193e-10
DLD	ENSG00000091140	1738	dihydrolipoamide dehydrogenase	nucleus|mitochondrion|mitochondrial matrix|cilium|acrosomal matrix|	pyruvate metabolic process|tricarboxylic acid cycle|mitochondrial electron transport, NADH to ubiquinone|proteolysis|lysine catabolic process|gastrulation|branched-chain amino acid catabolic process|regulation of acetyl-CoA biosynthetic process from pyruvate|cellular nitrogen compound metabolic process|regulation of membrane potential|cellular metabolic process|small molecule metabolic process|ce…	dihydrolipoyl dehydrogenase activity|flavin adenine dinucleotide binding|	20	-1.90318	-4.5016	2.42657e-08	6.19674e-07
SFXN4	ENSG00000183605	119559	sideroflexin 4	mitochondrial inner membrane|integral component of membrane|intracellular membrane-bounded organelle|	cation transport|iron ion homeostasis|transmembrane transport|	cation transmembrane transporter activity|	20	-1.85848	-4.50137	6.40183e-06	7.01671e-05
MARK3	ENSG00000075413	4140	microtubule affinity regulating kinase 3	plasma membrane|	protein phosphorylation|	protein serine/threonine kinase activity|protein binding|ATP binding|	20	-1.43054	-4.49784	7.99737e-07	1.21082e-05
SLC38A2	ENSG00000134294	54407	solute carrier family 38 member 2	plasma membrane|integral component of membrane|	amino acid transmembrane transport|ion transport|sodium ion transport|amino acid transport|synaptic transmission|neurotransmitter secretion|glutamate secretion|transmembrane transport|	amino acid transmembrane transporter activity|symporter activity|	20	-1.95474	-4.49549	1.59325e-09	7.0082e-08
DHX33	ENSG00000005100	56919	DEAH-box helicase 33	nucleoplasm|nucleolus|	ATP catabolic process|positive regulation of transcription from RNA polymerase I promoter|	rDNA binding|ATP binding|ATP-dependent helicase activity|activating transcription factor binding|poly(A) RNA binding|	18	-2.45916	-4.49495	1.28744e-09	5.86988e-08
SETD1A	ENSG00000099381	9739	SET domain containing 1A	nucleus|chromosome|nuclear speck|histone methyltransferase complex|Set1C/COMPASS complex|	transcription, DNA-templated|regulation of transcription, DNA-templated|histone H3-K4 methylation|	nucleotide binding|RNA binding|protein binding|histone methyltransferase activity (H3-K4 specific)|	20	-2.98577	-4.4949	2.07364e-09	8.57361e-08
TMPO	ENSG00000120802	7112	thymopoietin	chromatin|nucleus|nucleus|nuclear envelope|nuclear inner membrane|membrane|integral component of membrane|nuclear membrane|	regulation of transcription, DNA-templated|	DNA binding|protein binding|lamin binding|	20	-1.58644	-4.49214	8.39532e-09	2.60333e-07
VPS16	ENSG00000215305	64601	VPS16, CORVET/HOPS core subunit	lysosomal membrane|early endosome|late endosome|actin filament|axon|HOPS complex|late endosome membrane|neuronal cell body|recycling endosome|	intracellular protein transport|	actin filament binding|	16	-1.53595	-4.49109	5.66638e-07	9.09627e-06
MTR	ENSG00000116984	4548	5-methyltetrahydrofolate-homocysteine methyltransferase	cytosol|	sulfur amino acid metabolic process|vitamin metabolic process|water-soluble vitamin metabolic process|xenobiotic metabolic process|nervous system development|methionine biosynthetic process|cobalamin metabolic process|methylation|cellular nitrogen compound metabolic process|pteridine-containing compound metabolic process|small molecule metabolic process|	zinc ion binding|methionine synthase activity|S-adenosylmethionine-homocysteine S-methyltransferase activity|cobalamin binding|	20	-1.44773	-4.49073	1.8744e-08	4.97762e-07
ATP5L	ENSG00000167283	10632	ATP synthase, H+ transporting, mitochondrial Fo complex subunit G	mitochondrial proton-transporting ATP synthase complex, coupling factor F(o)|mitochondrion|mitochondrial inner membrane|mitochondrial proton-transporting ATP synthase complex|extracellular vesicular exosome|	ATP catabolic process|respiratory electron transport chain|mitochondrial ATP synthesis coupled proton transport|mitochondrial ATP synthesis coupled proton transport|cellular metabolic process|small molecule metabolic process|	hydrogen ion transmembrane transporter activity|ATPase activity|transmembrane transporter activity|	20	-1.63881	-4.48414	1.09058e-08	3.2186e-07
SRRT	ENSG00000087087	51593	serrate, RNA effector molecule	nucleoplasm|cytoplasm|	transcription, DNA-templated|regulation of transcription, DNA-templated|cell proliferation|primary miRNA processing|response to arsenic-containing substance|neuronal stem cell maintenance|	DNA binding|protein binding|poly(A) RNA binding|	20	-2.43875	-4.47996	2.04751e-10	1.37189e-08
CTD-2410N18.5	ENSG00000272772						18	-3.50867	-4.47947	1.15707e-11	1.68214e-09
CAD	ENSG00000084774	790	carbamoyl-phosphate synthetase 2, aspartate transcarbamylase, and dihydroorotase	nucleus|cytosol|cytosol|membrane|nuclear matrix|cell projection|neuronal cell body|terminal bouton|protein complex|extracellular vesicular exosome|	pyrimidine nucleobase metabolic process|'de novo' pyrimidine nucleobase biosynthetic process|'de novo' pyrimidine nucleobase biosynthetic process|UTP biosynthetic process|glutamine metabolic process|glutamine catabolic process|female pregnancy|lactation|embryo development|response to amine|drug metabolic process|peptidyl-threonine phosphorylation|response to caffeine|organ regeneration|response t…	aspartate carbamoyltransferase activity|aspartate carbamoyltransferase activity|carbamoyl-phosphate synthase (glutamine-hydrolyzing) activity|carbamoyl-phosphate synthase (glutamine-hydrolyzing) activity|dihydroorotase activity|dihydroorotase activity|dihydroorotase activity|protein kinase activity|ATP binding|zinc ion binding|enzyme binding|identical protein binding|aspartate binding|	20	-2.25665	-4.47875	1.24301e-10	9.82184e-09
RPS12	ENSG00000112306	6206	ribosomal protein S12	cytosol|membrane|cytosolic small ribosomal subunit|cytosolic small ribosomal subunit|	nuclear-transcribed mRNA catabolic process, nonsense-mediated decay|translation|translation|translation|translational initiation|translational elongation|translational termination|SRP-dependent cotranslational protein targeting to membrane|gene expression|viral process|RNA metabolic process|mRNA metabolic process|viral life cycle|viral transcription|cellular protein metabolic process|	structural constituent of ribosome|poly(A) RNA binding|	18	-2.57537	-4.47844	1.56769e-09	6.91101e-08
HIST1H3F	ENSG00000256316	8968	histone cluster 1 H3 family member f	nuclear chromosome|nucleosome|extracellular region|nucleus|nucleoplasm|membrane|protein complex|extracellular vesicular exosome|	chromatin organization|DNA replication-dependent nucleosome assembly|blood coagulation|regulation of gene silencing|	DNA binding|protein binding|protein heterodimerization activity|	20	-1.80229	-4.47826	3.89958e-09	1.41848e-07
RPS5	ENSG00000083845	6193	ribosomal protein S5	cytosol|membrane|cytosolic small ribosomal subunit|ribonucleoprotein complex|extracellular vesicular exosome|	nuclear-transcribed mRNA catabolic process, nonsense-mediated decay|translation|translation|translation|translation|translational initiation|translational initiation|translational elongation|translational termination|regulation of translational fidelity|SRP-dependent cotranslational protein targeting to membrane|gene expression|viral process|RNA metabolic process|mRNA metabolic process|viral life…	RNA binding|mRNA binding|structural constituent of ribosome|poly(A) RNA binding|	16	-2.72275	-4.47703	2.58952e-09	1.0405e-07
PSMC1	ENSG00000100764	5700	proteasome 26S subunit, ATPase 1	proteasome complex|nucleus|nucleoplasm|cytoplasm|cytosol|membrane|proteasome accessory complex|	G1/S transition of mitotic cell cycle|protein polyubiquitination|mitotic cell cycle|antigen processing and presentation of peptide antigen via MHC class I|antigen processing and presentation of exogenous peptide antigen via MHC class I, TAP-dependent|ATP catabolic process|regulation of cellular amino acid metabolic process|apoptotic process|DNA damage response, signal transduction by p53 class me…	protein binding|ATP binding|ATPase activity|TBP-class protein binding|poly(A) RNA binding|	18	-1.76882	-4.47596	5.14583e-10	2.85188e-08
YEATS4	ENSG00000127337	8089	YEATS domain containing 4	nucleoplasm|nucleoplasm|nuclear matrix|NuA4 histone acetyltransferase complex|	chromatin organization|transcription, DNA-templated|mitotic nuclear division|regulation of growth|histone H4 acetylation|histone H2A acetylation|positive regulation of transcription, DNA-templated|	DNA binding|sequence-specific DNA binding transcription factor activity|structural constituent of cytoskeleton|protein binding|protein C-terminus binding|	20	-1.76069	-4.47559	2.84897e-07	5.04379e-06
ZBTB39	ENSG00000166860	9880	zinc finger and BTB domain containing 39	nucleus|	transcription, DNA-templated|regulation of transcription, DNA-templated|	DNA binding|metal ion binding|	20	-1.96899	-4.47308	1.0757e-07	2.18089e-06
ANKRD40	ENSG00000154945	91369	ankyrin repeat domain 40	cellular_component|	biological_process|	molecular_function|	20	-2.00509	-4.47255	7.49178e-12	1.24676e-09
HELZ2	ENSG00000130589	85441	helicase with zinc finger 2	nucleoplasm|membrane|	transcription, DNA-templated|cellular lipid metabolic process|small molecule metabolic process|positive regulation of transcription from RNA polymerase II promoter|	DNA binding|helicase activity|protein binding|ATP binding|ligand-dependent nuclear receptor transcription coactivator activity|poly(A) RNA binding|metal ion binding|	20	-2.24289	-4.4714	1.04914e-08	3.12239e-07
FH	ENSG00000091483	2271	fumarate hydratase	cytoplasm|mitochondrion|mitochondrial matrix|tricarboxylic acid cycle enzyme complex|extracellular vesicular exosome|	tricarboxylic acid cycle|tricarboxylic acid cycle|fumarate metabolic process|cellular metabolic process|small molecule metabolic process|homeostasis of number of cells within a tissue|	fumarate hydratase activity|	20	-2.96621	-4.47043	2.09458e-10	1.39429e-08
SGOL1	ENSG00000129810						16	-2.22191	-4.47019	3.54538e-08	8.46061e-07
BRD2	ENSG00000204256	6046	bromodomain containing 2	nucleus|cytoplasm|	nucleosome assembly|transcription, DNA-templated|regulation of transcription from RNA polymerase II promoter|spermatogenesis|chromatin modification|	chromatin binding|protein binding|lysine-acetylated histone binding|	20	-2.31003	-4.46915	1.1319e-09	5.32726e-08
PEAR1	ENSG00000187800	375033	platelet endothelial aggregation receptor 1	phagocytic cup|integral component of membrane|	recognition of apoptotic cell|		18	-1.69488	-4.46618	7.78763e-08	1.65094e-06
CTB-50L17.14	ENSG00000267385						20	-1.48265	-4.46568	2.45513e-06	3.09331e-05
RNF126	ENSG00000070423	55658	ring finger protein 126	nucleus|cytoplasm|	metabolic process|	protein binding|zinc ion binding|ligase activity|	20	-1.39651	-4.46506	5.73369e-08	1.26802e-06
TRMT10C	ENSG00000174173	54931	tRNA methyltransferase 10C, mitochondrial RNase P subunit	nucleus|mitochondrion|mitochondrial nucleoid|	mitochondrial RNA 5'-end processing|tRNA processing|methylation|	protein binding|methyltransferase activity|poly(A) RNA binding|	20	-1.67405	-4.46399	1.69296e-08	4.59353e-07
DDA1	ENSG00000130311	79016	DET1 and DDB1 associated 1				20	-1.85345	-4.46385	9.67168e-09	2.91757e-07
REXO1	ENSG00000079313	57455	RNA exonuclease 1 homolog	nucleus|	nucleic acid phosphodiester bond hydrolysis|	nucleic acid binding|exonuclease activity|	18	-1.66215	-4.45992	6.43574e-08	1.40032e-06
ANKRD20A4	ENSG00000172014	728747	ankyrin repeat domain 20 family member A4				10	-1.60283	-4.45974	4.16607e-06	4.84828e-05
PXMP2	ENSG00000176894	5827	peroxisomal membrane protein 2	cytoplasm|mitochondrion|peroxisomal membrane|membrane|integral component of membrane|protein complex|	biological_process|	protein binding|	10	-1.63131	-4.4568	2.60252e-06	3.24675e-05
CCT7	ENSG00000135624	10574	chaperonin containing TCP1 subunit 7	zona pellucida receptor complex|cytoplasm|mitochondrion|cytosol|chaperonin-containing T-complex|microtubule|cell body|extracellular vesicular exosome|	protein folding|binding of sperm to zona pellucida|cellular protein metabolic process|'de novo' posttranslational protein folding|	ATP binding|identical protein binding|unfolded protein binding|	20	-2.6511	-4.45656	2.41011e-08	6.1626e-07
RP11-512M8.5	ENSG00000256861						20	-1.4864	-4.45313	6.26768e-07	9.89452e-06
ARIH2	ENSG00000177479	10425	ariadne RBR E3 ubiquitin protein ligase 2	nucleus|cytoplasm|	protein polyubiquitination|multicellular organismal development|protein ubiquitination involved in ubiquitin-dependent protein catabolic process|developmental cell growth|protein K63-linked ubiquitination|protein K48-linked ubiquitination|hematopoietic stem cell proliferation|	nucleic acid binding|ubiquitin-protein transferase activity|protein binding|zinc ion binding|ligase activity|	20	-1.6766	-4.44725	4.6083e-05	0.00038028
CH17-132F21.1	ENSG00000270999						16	-2.63984	-4.44595	1.84279e-08	4.90672e-07
RAD51B	ENSG00000182185	5890	RAD51 paralog B	nucleus|nucleoplasm|replication fork|Rad51B-Rad51C-Rad51D-XRCC2 complex|	double-strand break repair via homologous recombination|ATP catabolic process|ATP catabolic process|DNA repair|DNA recombination|reciprocal meiotic recombination|blood coagulation|positive regulation of G2/M transition of mitotic cell cycle|	four-way junction DNA binding|DNA binding|double-stranded DNA binding|single-stranded DNA binding|protein binding|ATP binding|DNA-dependent ATPase activity|	18	-2.68524	-4.44547	2.23108e-06	2.84876e-05
ATP5I	ENSG00000169020	521	ATP synthase, H+ transporting, mitochondrial Fo complex subunit E	mitochondrial proton-transporting ATP synthase complex, coupling factor F(o)|mitochondrion|mitochondrial inner membrane|mitochondrial proton-transporting ATP synthase complex|	ATP catabolic process|respiratory electron transport chain|mitochondrial ATP synthesis coupled proton transport|mitochondrial ATP synthesis coupled proton transport|cellular metabolic process|small molecule metabolic process|	hydrogen ion transmembrane transporter activity|ATPase activity|transmembrane transporter activity|	20	-5.45599	-4.44388	9.85312e-07	1.43124e-05
DSCC1	ENSG00000136982	79075	DNA replication and sister chromatid cohesion 1	chromosome, centromeric region|chromatin|nucleoplasm|	DNA replication|regulation of DNA replication|maintenance of mitotic sister chromatid cohesion|post-translational protein acetylation|	DNA binding|protein binding|	20	-2.20497	-4.44308	1.52139e-09	6.73662e-08
MCM3	ENSG00000112118	4172	minichromosome maintenance complex component 3	nucleus|nucleoplasm|alpha DNA polymerase:primase complex|centrosome|membrane|MCM complex|intracellular membrane-bounded organelle|perinuclear region of cytoplasm|	G1/S transition of mitotic cell cycle|mitotic cell cycle|DNA replication|DNA replication initiation|DNA strand elongation involved in DNA replication|DNA duplex unwinding|	DNA binding|DNA helicase activity|protein binding|ATP binding|	20	-3.66404	-4.44038	1.00813e-06	1.45675e-05
RP11-613M10.8	ENSG00000256966						20	-1.5088	-4.43947	8.55681e-05	0.000642887
RPL28	ENSG00000108107	6158	ribosomal protein L28	cytoplasm|cytosol|membrane|cytosolic large ribosomal subunit|dendrite|cytoplasmic ribonucleoprotein granule|cell body|extracellular vesicular exosome|	nuclear-transcribed mRNA catabolic process, nonsense-mediated decay|translation|translation|translational initiation|translational elongation|translational termination|SRP-dependent cotranslational protein targeting to membrane|gene expression|viral process|RNA metabolic process|mRNA metabolic process|viral life cycle|viral transcription|cellular protein metabolic process|	RNA binding|structural constituent of ribosome|protein binding|poly(A) RNA binding|	20	-1.7734	-4.43919	6.47582e-07	1.01668e-05
NDUFA8	ENSG00000119421	4702	NADH:ubiquinone oxidoreductase subunit A8	mitochondrion|mitochondrial inner membrane|mitochondrial respiratory chain complex I|mitochondrial respiratory chain complex I|mitochondrial intermembrane space|	mitochondrial electron transport, NADH to ubiquinone|respiratory electron transport chain|cellular metabolic process|small molecule metabolic process|	NADH dehydrogenase (ubiquinone) activity|protein complex binding|	20	-2.43875	-4.43821	1.08426e-07	2.19109e-06
SYVN1	ENSG00000162298	84447	synoviolin 1	nucleus|endoplasmic reticulum|endoplasmic reticulum membrane|membrane|integral component of membrane|	in utero embryonic development|activation of signaling protein activity involved in unfolded protein response|protein ubiquitination|protein N-linked glycosylation via asparagine|ER-associated ubiquitin-dependent protein catabolic process|ER-associated ubiquitin-dependent protein catabolic process|endoplasmic reticulum unfolded protein response|cellular protein metabolic process|negative regulati…	protein binding|zinc ion binding|acid-amino acid ligase activity|	20	-2.59017	-4.43797	3.62965e-08	8.61879e-07
RER1	ENSG00000157916	11079	retention in endoplasmic reticulum sorting receptor 1	Golgi apparatus|integral component of Golgi membrane|	retrograde vesicle-mediated transport, Golgi to ER|	molecular_function|	20	-1.68911	-4.43782	6.60408e-05	0.000517393
HMGA1	ENSG00000137309	3159	high mobility group AT-hook 1	nucleus|nucleoplasm|transcription factor complex|cytosol|senescence-associated heterochromatin focus|	DNA catabolic process, endonucleolytic|DNA unwinding involved in DNA replication|base-excision repair|nucleosome disassembly|transcription, DNA-templated|regulation of transcription, DNA-templated|protein complex assembly|negative regulation of cell proliferation|response to virus|viral process|negative regulation of chromatin silencing|senescence-associated heterochromatin focus assembly|negativ…	DNA binding|AT DNA binding|sequence-specific DNA binding transcription factor activity|DNA-(apurinic or apyrimidinic site) lyase activity|protein binding|transcription factor binding|enzyme binding|ligand-dependent nuclear receptor transcription coactivator activity|retinoic acid receptor binding|peroxisome proliferator activated receptor binding|retinoid X receptor binding|5'-deoxyribose-5-phosp…	20	-1.47579	-4.43734	7.13145e-07	1.09973e-05
UTP18	ENSG00000011260	51096	UTP18, small subunit processome component	nucleus|nucleolus|	rRNA processing|	poly(A) RNA binding|	20	-2.3799	-4.43661	4.39623e-08	1.01027e-06
SRCAP	ENSG00000080603	10847	Snf2 related CREBBP activator protein	nucleus|Golgi apparatus|protein complex|	transcription, DNA-templated|regulation of transcription from RNA polymerase II promoter|viral process|histone acetylation|	DNA binding|transcription coactivator activity|helicase activity|histone acetyltransferase activity|ATP binding|	18	-2.51825	-4.428	9.32912e-10	4.52191e-08
SSH3	ENSG00000172830	54961	slingshot protein phosphatase 3	nucleus|cytoplasm|cytoskeleton|	protein dephosphorylation|regulation of actin polymerization or depolymerization|regulation of lamellipodium assembly|peptidyl-tyrosine dephosphorylation|regulation of axonogenesis|	DNA binding|actin binding|protein tyrosine phosphatase activity|protein tyrosine/serine/threonine phosphatase activity|	16	-1.37976	-4.42746	1.26922e-06	1.76384e-05
EEF2	ENSG00000167658	1938	eukaryotic translation elongation factor 2	nucleus|cytosol|polysome|membrane|ribonucleoprotein complex|extracellular vesicular exosome|	GTP catabolic process|translation|translational elongation|cell death|gene expression|positive regulation of gene expression|cellular protein metabolic process|positive regulation of translation|	translation elongation factor activity|GTPase activity|GTP binding|translation activator activity|protein kinase binding|poly(A) RNA binding|	18	-2.57251	-4.42452	1.90237e-07	3.51437e-06
UNC93B1	ENSG00000110057	81622	unc-93 homolog B1 (C. elegans)	Golgi membrane|lysosome|endosome|endosome|endoplasmic reticulum|endoplasmic reticulum membrane|integral component of membrane|early phagosome|	toll-like receptor signaling pathway|intracellular protein transport|toll-like receptor 3 signaling pathway|toll-like receptor 7 signaling pathway|toll-like receptor 9 signaling pathway|innate immune response|defense response to virus|		20	-1.47615	-4.4206	2.49976e-09	1.01464e-07
DCPS	ENSG00000110063	28960	decapping enzyme, scavenger	nucleus|cytoplasm|mitochondrion|cytosol|	nuclear-transcribed mRNA catabolic process, deadenylation-dependent decay|deadenylation-dependent decapping of nuclear-transcribed mRNA|gene expression|RNA metabolic process|mRNA metabolic process|cellular response to menadione|negative regulation of programmed cell death|exonucleolytic nuclear-transcribed mRNA catabolic process involved in deadenylation-dependent decay|mRNA cis splicing, via spl…	RNA 7-methylguanosine cap binding|protein binding|m7G(5')pppN diphosphatase activity|	18	-3.08436	-4.42054	2.61762e-09	1.04967e-07
ELP5	ENSG00000170291	23587	elongator acetyltransferase complex subunit 5	nucleus|cytoplasm|Elongator holoenzyme complex|	chromatin organization|transcription, DNA-templated|regulation of transcription, DNA-templated|positive regulation of cell migration|	protein binding|	18	-3.07186	-4.41795	5.91256e-12	1.06056e-09
ZNF276	ENSG00000158805	92822	zinc finger protein 276	nucleus|	transcription, DNA-templated|regulation of transcription, DNA-templated|	DNA binding|zinc ion binding|	20	-1.36437	-4.41512	4.7105e-08	1.07018e-06
STRA13	ENSG00000169689						20	-2.18142	-4.41296	5.58268e-08	1.23874e-06
COX4I1	ENSG00000131143	1327	cytochrome c oxidase subunit 4I1	nucleus|mitochondrion|mitochondrial inner membrane|membrane|extracellular vesicular exosome|	generation of precursor metabolites and energy|response to nutrient|respiratory electron transport chain|cellular metabolic process|small molecule metabolic process|hydrogen ion transmembrane transport|hydrogen ion transmembrane transport|	cytochrome-c oxidase activity|protein binding|	20	-2.10823	-4.41259	7.31072e-10	3.75309e-08
KRTAP4-6	ENSG00000198090	81871	keratin associated protein 4-6	keratin filament|			20	-1.76961	-4.41064	2.29918e-07	4.1627e-06
PPP2R4	ENSG00000119383						20	-2.94742	-4.40778	3.7298e-11	3.76183e-09
AQP5	ENSG00000161798	362	aquaporin 5	endoplasmic reticulum|plasma membrane|integral component of plasma membrane|microvillus|basal plasma membrane|apical plasma membrane|extracellular vesicular exosome|	water transport|excretion|carbon dioxide transport|pancreatic juice secretion|odontogenesis|saliva secretion|camera-type eye morphogenesis|transmembrane transport|	protein binding|water channel activity|	18	-1.39896	-4.40745	5.06811e-09	1.73305e-07
EARS2	ENSG00000103356	124454	glutamyl-tRNA synthetase 2, mitochondrial	mitochondrion|mitochondrial matrix|	tRNA aminoacylation for protein translation|glutamyl-tRNA aminoacylation|gene expression|tRNA aminoacylation for mitochondrial protein translation|	tRNA binding|glutamate-tRNA ligase activity|ATP binding|glutamate-tRNA(Gln) ligase activity|	18	-3.55469	-4.40676	4.86439e-10	2.72871e-08
FLII	ENSG00000177731	2314	FLII, actin remodeling protein	nucleus|cytoplasm|microtubule organizing center|focal adhesion|	transcription, DNA-templated|regulation of transcription, DNA-templated|muscle contraction|multicellular organismal development|	actin binding|protein binding|	20	-1.85883	-4.40526	1.87155e-06	2.44921e-05
RPS28	ENSG00000233927	6234	ribosomal protein S28	cytoplasm|cytosol|small ribosomal subunit|cytosolic small ribosomal subunit|extracellular vesicular exosome|	nuclear-transcribed mRNA catabolic process, nonsense-mediated decay|rRNA processing|translation|translation|translational initiation|translational elongation|translational termination|SRP-dependent cotranslational protein targeting to membrane|gene expression|viral process|RNA metabolic process|mRNA metabolic process|viral life cycle|viral transcription|ribosomal small subunit biogenesis|cellular…	structural constituent of ribosome|poly(A) RNA binding|	18	-2.57091	-4.40448	2.01417e-10	1.35866e-08
AP2M1	ENSG00000161203	1173	adaptor related protein complex 2 mu 1 subunit	mitochondrion|lysosomal membrane|cytosol|plasma membrane|coated pit|clathrin adaptor complex|endocytic vesicle membrane|clathrin-coated endocytic vesicle membrane|extracellular vesicular exosome|	intracellular protein transport|endocytosis|epidermal growth factor receptor signaling pathway|synaptic transmission|axon guidance|viral process|antigen processing and presentation of exogenous peptide antigen via MHC class II|negative regulation of epidermal growth factor receptor signaling pathway|neurotrophin TRK receptor signaling pathway|regulation of defense response to virus by virus|membr…	transporter activity|protein binding|lipid binding|	20	-1.94564	-4.4038	1.85382e-08	4.92954e-07
TPT1	ENSG00000133112	7178	tumor protein, translationally-controlled 1	extracellular space|nucleus|nucleoplasm|cytoplasm|cytoplasm|multivesicular body|tubulin complex|	calcium ion transport|cellular calcium ion homeostasis|response to virus|stem cell maintenance|regulation of apoptotic process|negative regulation of apoptotic process|negative regulation of intrinsic apoptotic signaling pathway in response to DNA damage|negative regulation of ectoderm development|	calcium ion binding|protein binding|transcription factor binding|poly(A) RNA binding|	20	-4.15312	-4.40307	1.25315e-09	5.77953e-08
NOC2L	ENSG00000188976	26155	NOC2 like nucleolar associated transcriptional repressor	nucleus|nucleoplasm|nucleolus|	negative regulation of transcription from RNA polymerase II promoter|negative regulation of B cell apoptotic process|transcription, DNA-templated|apoptotic process|chromatin assembly|nucleolus to nucleoplasm transport|cellular response to UV|negative regulation of histone acetylation|negative regulation of intrinsic apoptotic signaling pathway|	chromatin binding|transcription corepressor activity|protein binding|nucleosome binding|histone binding|poly(A) RNA binding|repressing transcription factor binding|	20	-2.16094	-4.40205	1.23458e-07	2.44104e-06
YIPF2	ENSG00000130733	78992	Yip1 domain family member 2	integral component of membrane|transport vesicle|			20	-1.39064	-4.40008	1.72484e-06	2.28415e-05
RP13-672B3.2	ENSG00000256632						20	-1.36616	-4.39768	2.66298e-08	6.66412e-07
DHPS	ENSG00000095059	1725	deoxyhypusine synthase	cytosol|	translation|positive regulation of cell proliferation|peptidyl-lysine modification to peptidyl-hypusine|post-translational protein modification|cellular protein metabolic process|deoxyhypusine biosynthetic process from spermidine|protein homotetramerization|	protein binding|deoxyhypusine synthase activity|	20	-3.77191	-4.39395	1.70772e-13	1.42097e-10
MRPL55	ENSG00000162910	128308	mitochondrial ribosomal protein L55	mitochondrial large ribosomal subunit|	translation|	structural constituent of ribosome|	20	-1.44549	-4.38995	2.68412e-07	4.77793e-06
MYT1	ENSG00000196132	4661	myelin transcription factor 1	nucleus|	transcription, DNA-templated|regulation of transcription, DNA-templated|nervous system development|cell differentiation|	enhancer sequence-specific DNA binding|sequence-specific DNA binding transcription factor activity|zinc ion binding|	18	-1.65263	-4.38822	2.48416e-08	6.33571e-07
RAB1A	ENSG00000138069	5861	RAB1A, member RAS oncogene family	Golgi membrane|early endosome|endoplasmic reticulum|cytosol|melanosome|extracellular vesicular exosome|	autophagic vacuole assembly|mitotic cell cycle|GTP catabolic process|ER to Golgi vesicle-mediated transport|endocytosis|autophagy|small GTPase mediated signal transduction|vesicle-mediated transport|cell migration|growth hormone secretion|defense response to bacterium|vesicle transport along microtubule|interleukin-8 secretion|	GTPase activity|protein binding|GTP binding|	20	-1.4962	-4.388	7.79379e-06	8.27443e-05
PGGT1B	ENSG00000164219	5229	protein geranylgeranyltransferase type I subunit beta	CAAX-protein geranylgeranyltransferase complex|	positive regulation of cell proliferation|protein geranylgeranylation|response to cytokine|positive regulation of cell cycle|negative regulation of nitric-oxide synthase biosynthetic process|	protein geranylgeranyltransferase activity|CAAX-protein geranylgeranyltransferase activity|zinc ion binding|	20	-2.48205	-4.38486	2.94683e-10	1.80516e-08
NUDT21	ENSG00000167005	11051	nudix hydrolase 21	nucleus|nucleoplasm|centrosome|mRNA cleavage factor complex|paraspeckles|	mRNA splicing, via spliceosome|transcription from RNA polymerase II promoter|termination of RNA polymerase II transcription|mRNA polyadenylation|mRNA processing|RNA splicing|gene expression|mRNA 3'-end processing|protein tetramerization|	RNA binding|mRNA binding|protein binding|hydrolase activity|AU-rich element binding|protein homodimerization activity|histone deacetylase binding|poly(A) RNA binding|	20	-2.06952	-4.38322	4.19683e-09	1.49129e-07
AL354718.1	ENSG00000268578						20	-1.82052	-4.38257	1.52253e-05	0.000146459
UBE2C	ENSG00000175063	11065	ubiquitin conjugating enzyme E2 C	nucleoplasm|anaphase-promoting complex|cytosol|	mitotic cell cycle|ubiquitin-dependent protein catabolic process|cell cycle|spindle organization|mitotic spindle assembly checkpoint|cyclin catabolic process|exit from mitosis|free ubiquitin chain polymerization|protein ubiquitination|anaphase-promoting complex-dependent proteasomal ubiquitin-dependent protein catabolic process|anaphase-promoting complex-dependent proteasomal ubiquitin-dependent …	ubiquitin-protein transferase activity|ubiquitin-protein transferase activity|protein binding|ATP binding|acid-amino acid ligase activity|	20	-3.96429	-4.37601	6.57652e-08	1.42598e-06
NPM1	ENSG00000181163	4869	nucleophosmin	nucleus|nucleus|nucleoplasm|nucleoplasm|nucleolus|cytoplasm|cytoplasm|centrosome|centrosome|cytosol|membrane|ribonucleoprotein complex|spindle pole centrosome|	DNA repair|nucleosome assembly|nucleosome assembly|intracellular protein transport|nucleocytoplasmic transport|nucleocytoplasmic transport|response to stress|centrosome cycle|centrosome cycle|signal transduction|cell aging|cell aging|protein localization|negative regulation of cell proliferation|negative regulation of cell proliferation|negative regulation of centrosome duplication|viral process|…	transcription coactivator activity|RNA binding|protein kinase inhibitor activity|protein binding|protein kinase binding|Tat protein binding|histone binding|protein homodimerization activity|ribosomal large subunit binding|ribosomal small subunit binding|poly(A) RNA binding|protein heterodimerization activity|NF-kappaB binding|NF-kappaB binding|unfolded protein binding|unfolded protein binding|	20	-3.522	-4.37601	7.4574e-10	3.81857e-08
HDAC3	ENSG00000171720	8841	histone deacetylase 3	histone deacetylase complex|nucleus|nucleus|nucleoplasm|cytoplasm|spindle microtubule|transcriptional repressor complex|	negative regulation of transcription from RNA polymerase II promoter|negative regulation of transcription from RNA polymerase II promoter|transcription, DNA-templated|protein deacetylation|Notch signaling pathway|regulation of mitotic cell cycle|chromatin modification|circadian regulation of gene expression|regulation of multicellular organism growth|negative regulation of apoptotic process|cellu…	chromatin binding|transcription corepressor activity|transcription corepressor activity|histone deacetylase activity|histone deacetylase activity|protein binding|transcription factor binding|transcription factor binding|enzyme binding|cyclin binding|chromatin DNA binding|NAD-dependent histone deacetylase activity (H3-K14 specific)|protein deacetylase activity|histone deacetylase binding|NAD-depen…	20	-2.08704	-4.37523	6.22407e-10	3.31452e-08
EMC1	ENSG00000127463	23065	ER membrane protein complex subunit 1	integral component of membrane|ER membrane protein complex|			20	-2.52804	-4.37429	1.54245e-07	2.9392e-06
DCUN1D3	ENSG00000188215	123879	defective in cullin neddylation 1 domain containing 3	perinuclear region of cytoplasm|	response to UV-C|response to gamma radiation|negative regulation of cell growth|positive regulation of apoptotic process|	molecular_function|	20	-1.38464	-4.37378	2.95806e-07	5.21841e-06
MRPL52	ENSG00000172590	122704	mitochondrial ribosomal protein L52	mitochondrial large ribosomal subunit|	translation|	structural constituent of ribosome|	20	-2.7601	-4.37203	9.15895e-08	1.90327e-06
SHMT1	ENSG00000176974	6470	serine hydroxymethyltransferase 1	nucleus|cytoplasm|mitochondrion|cytosol|cytosol|extracellular vesicular exosome|	L-serine catabolic process|vitamin metabolic process|water-soluble vitamin metabolic process|purine nucleobase biosynthetic process|glycine biosynthetic process from serine|cellular nitrogen compound metabolic process|tetrahydrofolate interconversion|small molecule metabolic process|carnitine biosynthetic process|folic acid metabolic process|folic acid metabolic process|protein tetramerization|pr…	glycine hydroxymethyltransferase activity|glycine hydroxymethyltransferase activity|L-allo-threonine aldolase activity|amino acid binding|pyridoxal phosphate binding|protein homodimerization activity|	18	-1.32061	-4.37075	1.48379e-07	2.85206e-06
GTF2B	ENSG00000137947	2959	general transcription factor IIB	nucleoplasm|	regulation of transcription, DNA-templated|transcription from RNA polymerase II promoter|transcription initiation from RNA polymerase II promoter|transcription elongation from RNA polymerase II promoter|gene expression|viral process|	core promoter binding|protein binding|transcription factor binding|zinc ion binding|TBP-class protein binding|thyroid hormone receptor binding|	16	-1.867	-4.36897	3.66705e-08	8.69726e-07
CCDC84	ENSG00000186166	338657	coiled-coil domain containing 84				20	-2.71179	-4.36782	1.27637e-11	1.75788e-09
STMN3	ENSG00000197457	50861	stathmin 3	cytoplasm|Golgi apparatus|axon|growth cone|	nervous system development|regulation of microtubule polymerization or depolymerization|cytoplasmic microtubule organization|neuron projection development|regulation of Rac GTPase activity|negative regulation of Rac protein signal transduction|regulation of cytoskeleton organization|	tubulin binding|protein domain specific binding|	20	-1.70379	-4.36583	1.30572e-08	3.70387e-07
PNKP	ENSG00000039650	11284	polynucleotide kinase 3'-phosphatase	nucleus|nucleolus|membrane|	nucleotide-excision repair, DNA damage removal|DNA-dependent DNA replication|DNA repair|response to oxidative stress|response to radiation|response to radiation|dephosphorylation|DNA damage response, detection of DNA damage|DNA damage response, detection of DNA damage|nucleotide phosphorylation|nucleic acid phosphodiester bond hydrolysis|polynucleotide 3' dephosphorylation|polynucleotide 3' depho…	damaged DNA binding|double-stranded DNA binding|endonuclease activity|protein binding|ATP binding|purine nucleotide binding|nucleotide kinase activity|polynucleotide 3'-phosphatase activity|ATP-dependent polydeoxyribonucleotide 5'-hydroxyl-kinase activity|	18	-1.89601	-4.36464	5.35755e-09	1.81033e-07
MRPS11	ENSG00000181991	64963	mitochondrial ribosomal protein S11	mitochondrion|mitochondrial small ribosomal subunit|mitochondrial small ribosomal subunit|	translation|DNA damage response, detection of DNA damage|	structural constituent of ribosome|poly(A) RNA binding|	20	-3.03655	-4.35599	3.25441e-09	1.23408e-07
LMNB1	ENSG00000113368	4001	lamin B1	nuclear envelope|nuclear inner membrane|lamin filament|nucleoplasm|membrane|nuclear membrane|	apoptotic process|cellular component disassembly involved in execution phase of apoptosis|	structural molecule activity|phospholipase binding|	20	-2.17649	-4.3528	6.45718e-10	3.41137e-08
GATA5	ENSG00000130700	140628	GATA binding protein 5	nucleus|nucleoplasm|	transcription from RNA polymerase II promoter|blood coagulation|positive regulation of transcription from RNA polymerase II promoter|intestinal epithelial cell differentiation|cellular response to BMP stimulus|	enhancer sequence-specific DNA binding|sequence-specific DNA binding transcription factor activity|RNA polymerase II distal enhancer sequence-specific DNA binding transcription factor activity|zinc ion binding|transcription regulatory region DNA binding|	20	-1.50563	-4.35168	4.40623e-07	7.33882e-06
CTD-2545M3.6	ENSG00000142539						16	-2.8476	-4.35038	1.45597e-07	2.81196e-06
MRM1	ENSG00000129282	79922	mitochondrial rRNA methyltransferase 1	mitochondrion|	RNA methylation|RNA processing|	RNA methyltransferase activity|poly(A) RNA binding|	18	-1.45289	-4.34778	2.13647e-07	3.89993e-06
PIGL	ENSG00000108474	9487	phosphatidylinositol glycan anchor biosynthesis class L	endoplasmic reticulum membrane|integral component of membrane|	C-terminal protein lipidation|GPI anchor biosynthetic process|preassembly of GPI anchor in ER membrane|post-translational protein modification|cellular protein metabolic process|	N-acetylglucosaminylphosphatidylinositol deacetylase activity|	20	-1.21117	-4.34312	2.23807e-06	2.85222e-05
RPL7L1	ENSG00000146223	285855	ribosomal protein L7 like 1	ribosome|		poly(A) RNA binding|	18	-2.51891	-4.34041	6.29301e-08	1.37798e-06
PTCD3	ENSG00000132300	55037	pentatricopeptide repeat domain 3	mitochondrion|	regulation of translation|mitochondrial translation|	rRNA binding|ribosomal small subunit binding|poly(A) RNA binding|	20	-4.07887	-4.33894	4.22028e-10	2.43572e-08
FAM103A1	ENSG00000169612	83640	family with sequence similarity 103 member A1	nucleus|mRNA cap binding complex|	7-methylguanosine mRNA capping|methylation|recruitment of mRNA capping enzyme to RNA polymerase II holoenzyme complex|	RNA binding|protein binding|poly(A) RNA binding|	20	-1.69664	-4.3389	1.78139e-11	2.28041e-09
ISG20L2	ENSG00000143319	81875	interferon stimulated exonuclease gene 20 like 2	nucleolus|	ribosome biogenesis|nucleic acid phosphodiester bond hydrolysis|	exonuclease activity|protein binding|poly(A) RNA binding|	16	-1.88473	-4.33439	6.33541e-05	0.000499282
CBWD7	ENSG00000215126	728013	COBW domain containing 7			ATP binding|	20	-2.98823	-4.33411	4.48353e-11	4.36762e-09
CLUH	ENSG00000132361	23277	clustered mitochondria homolog	cytoplasm|	intracellular distribution of mitochondria|		20	-1.35466	-4.33241	3.4231e-08	8.22615e-07
CNOT4	ENSG00000080802	4850	CCR4-NOT transcription complex subunit 4	nucleus|cytosol|CCR4-NOT complex|	nuclear-transcribed mRNA catabolic process, deadenylation-dependent decay|nuclear-transcribed mRNA poly(A) tail shortening|gene expression|RNA metabolic process|mRNA metabolic process|protein autoubiquitination|	nucleotide binding|ubiquitin-protein transferase activity|protein binding|zinc ion binding|ligase activity|poly(A) RNA binding|	20	-1.59963	-4.32943	4.88215e-10	2.731e-08
AC068987.1	ENSG00000260415						20	-1.58399	-4.32713	4.07922e-09	1.46251e-07
TDP2	ENSG00000111802	51567	tyrosyl-DNA phosphodiesterase 2	nucleus|nucleolus|cytoplasm|PML body|intercellular bridge|	double-strand break repair|double-strand break repair|cell surface receptor signaling pathway|nucleic acid phosphodiester bond hydrolysis|regulation of RNA biosynthetic process|	magnesium ion binding|magnesium ion binding|single-stranded DNA binding|transcription corepressor activity|nuclease activity|protein binding|manganese ion binding|tyrosyl-RNA phosphodiesterase activity|5'-tyrosyl-DNA phosphodiesterase activity|5'-tyrosyl-DNA phosphodiesterase activity|	20	-1.74851	-4.32666	2.07806e-07	3.79678e-06
SMYD5	ENSG00000135632	10322	SMYD family member 5	cellular_component|	biological_process|methylation|	molecular_function|methyltransferase activity|metal ion binding|	20	-1.30988	-4.32647	4.27881e-08	9.87837e-07
DUS1L	ENSG00000169718	64118	dihydrouridine synthase 1 like		tRNA dihydrouridine synthesis|oxidation-reduction process|	tRNA dihydrouridine synthase activity|flavin adenine dinucleotide binding|	20	-1.4595	-4.32419	1.26314e-07	2.48522e-06
C15orf41	ENSG00000186073	84529	chromosome 15 open reading frame 41				20	-2.60436	-4.32363	4.29973e-09	1.51439e-07
ZNF207	ENSG00000010244	7756	zinc finger protein 207	kinetochore|kinetochore|condensed chromosome kinetochore|nucleus|nucleus|microtubule|	mitotic sister chromatid segregation|regulation of transcription, DNA-templated|mitotic spindle assembly checkpoint|attachment of spindle microtubules to kinetochore|protein stabilization|regulation of chromosome segregation|	DNA binding|sequence-specific DNA binding transcription factor activity|protein binding|microtubule binding|heparin binding|zinc ion binding|poly(A) RNA binding|	18	-2.23279	-4.32135	1.22569e-07	2.42588e-06
MARS	ENSG00000166986	4141	methionyl-tRNA synthetase	cytoplasm|mitochondrion|cytosol|membrane|extracellular vesicular exosome|	tRNA aminoacylation for protein translation|methionyl-tRNA aminoacylation|gene expression|	tRNA binding|methionine-tRNA ligase activity|ATP binding|	16	-2.35013	-4.31848	2.76854e-08	6.86072e-07
ARMC7	ENSG00000125449	79637	armadillo repeat containing 7	cytoplasm|			16	-3.09858	-4.31714	1.70023e-05	0.000161147
TSG101	ENSG00000074319	7251	tumor susceptibility 101	ESCRT I complex|nucleolus|cytoplasm|cytoplasm|early endosome|late endosome|multivesicular body|plasma membrane|endosome membrane|late endosome membrane|extracellular vesicular exosome|	regulation of cell growth|cellular protein modification process|cell cycle arrest|negative regulation of cell proliferation|protein transport|viral process|endosomal transport|viral life cycle|virion assembly|viral protein processing|keratinocyte differentiation|ubiquitin-dependent protein catabolic process via the multivesicular body sorting pathway|ubiquitin-dependent protein catabolic process …	DNA binding|transcription corepressor activity|protein binding|ubiquitin protein ligase binding|protein homodimerization activity|ubiquitin binding|ubiquitin binding|calcium-dependent protein binding|	20	-2.14646	-4.31114	7.42971e-07	1.13782e-05
PLIN5	ENSG00000214456	440503	perilipin 5	cytoplasm|mitochondrion|lipid particle|	positive regulation of triglyceride biosynthetic process|positive regulation of lipid storage|positive regulation of sequestering of triglyceride|negative regulation of triglyceride catabolic process|negative regulation of fatty acid beta-oxidation|positive regulation of fatty acid beta-oxidation|lipid particle organization|negative regulation of peroxisome proliferator activated receptor signali…		12	-1.48958	-4.31025	1.14978e-05	0.000114921
RPL27	ENSG00000131469	6155	ribosomal protein L27	nucleus|cytosol|ribosome|membrane|cytosolic large ribosomal subunit|ribonucleoprotein complex|extracellular vesicular exosome|	nuclear-transcribed mRNA catabolic process, nonsense-mediated decay|translation|translation|translational initiation|translational elongation|translational termination|SRP-dependent cotranslational protein targeting to membrane|gene expression|viral process|RNA metabolic process|mRNA metabolic process|viral life cycle|viral transcription|cellular protein metabolic process|	structural constituent of ribosome|structural constituent of ribosome|poly(A) RNA binding|	20	-2.21041	-4.30884	1.58046e-11	2.03625e-09
PEA15	ENSG00000162734	8682	phosphoprotein enriched in astrocytes 15	cytoplasm|microtubule associated complex|	transport|apoptotic process|carbohydrate transport|response to morphine|negative regulation of glucose import|negative regulation of extrinsic apoptotic signaling pathway via death domain receptors|positive regulation of extrinsic apoptotic signaling pathway via death domain receptors|	protein binding|	20	-1.5624	-4.30391	3.73855e-05	0.000317832
MBD3L4	ENSG00000205718	653656	methyl-CpG binding domain protein 3 like 4		transcription, DNA-templated|regulation of transcription, DNA-templated|		10	-1.50888	-4.30282	8.9084e-05	0.000665298
LIN37	ENSG00000267796	55957	lin-37 DREAM MuvB core complex component	nucleoplasm|transcriptional repressor complex|	G2/M transition of mitotic cell cycle|mitotic cell cycle|regulation of cell cycle|	protein binding|	20	-1.16865	-4.3008	1.40859e-06	1.928e-05
RPS19	ENSG00000105372	6223	ribosomal protein S19	nucleolus|cytoplasm|cytosol|cytosol|ribosome|membrane|cytosolic small ribosomal subunit|extracellular vesicular exosome|	ribosomal small subunit assembly|nuclear-transcribed mRNA catabolic process, nonsense-mediated decay|maturation of SSU-rRNA from tricistronic rRNA transcript (SSU-rRNA, 5.8S rRNA, LSU-rRNA)|monocyte chemotaxis|rRNA processing|translation|translation|translational initiation|translational elongation|translational termination|SRP-dependent cotranslational protein targeting to membrane|nucleolus org…	structural constituent of ribosome|protein binding|fibroblast growth factor binding|protein kinase binding|protein homodimerization activity|poly(A) RNA binding|	16	-3.741	-4.30068	2.55725e-08	6.46433e-07
C6orf62	ENSG00000112308	81688	chromosome 6 open reading frame 62	intracellular|	biological_process|	molecular_function|	20	-1.24263	-4.30042	3.46439e-08	8.31536e-07
NACA	ENSG00000196531	4666	nascent polypeptide-associated complex alpha subunit	nucleus|nucleus|cytoplasm|cytoplasm|nascent polypeptide-associated complex|extracellular vesicular exosome|	cardiac ventricle development|transcription, DNA-templated|regulation of transcription, DNA-templated|translation|negative regulation of striated muscle cell apoptotic process|protein transport|viral process|skeletal muscle tissue regeneration|positive regulation of skeletal muscle tissue growth|regulation of skeletal muscle fiber development|heart trabecula morphogenesis|negative regulation of t…	DNA binding|transcription coactivator activity|protein binding|TBP-class protein binding|	20	-2.22769	-4.2963	9.76103e-08	2.00543e-06
PCGF2	ENSG00000056661	7703	polycomb group ring finger 2	nuclear chromatin|sex chromatin|nucleus|nuclear body|PcG protein complex|PRC1 complex|	negative regulation of transcription from RNA polymerase II promoter|in utero embryonic development|transcription, DNA-templated|anterior/posterior pattern specification|protein ubiquitination|histone acetylation|embryonic skeletal system morphogenesis|negative regulation of apoptotic signaling pathway|	DNA binding|chromatin binding|sequence-specific DNA binding transcription factor activity|ubiquitin-protein transferase activity|protein binding|zinc ion binding|	20	-1.40719	-4.29269	8.25444e-10	4.10052e-08
FRG2	ENSG00000205097	448831	FSHD region gene 2	nucleus|			20	-2.14248	-4.2917	0.000201886	0.00131883
IRS1	ENSG00000169047	3667	insulin receptor substrate 1	nucleus|cytoplasm|cytosol|plasma membrane|insulin receptor complex|caveola|intracellular membrane-bounded organelle|	positive regulation of mesenchymal cell proliferation|signal transduction|epidermal growth factor receptor signaling pathway|positive regulation of cell proliferation|insulin receptor signaling pathway|insulin receptor signaling pathway|insulin receptor signaling pathway|insulin receptor signaling pathway|fibroblast growth factor receptor signaling pathway|regulation of gene expression|positive r…	signal transducer activity|transmembrane receptor protein tyrosine kinase adaptor activity|protein kinase C binding|insulin receptor binding|insulin-like growth factor receptor binding|protein binding|SH2 domain binding|phosphatidylinositol 3-kinase binding|phosphatidylinositol 3-kinase binding|	20	-1.6998	-4.2884	2.66148e-09	1.06087e-07
TRA2B	ENSG00000136527	6434	transformer 2 beta homolog (Drosophila)	nucleus|	RNA splicing, via transesterification reactions|regulation of alternative mRNA splicing, via spliceosome|mRNA splicing, via spliceosome|positive regulation of mRNA splicing, via spliceosome|	nucleotide binding|mRNA binding|protein binding|poly(A) RNA binding|	20	-2.20618	-4.28382	1.89605e-07	3.50974e-06
BPTF	ENSG00000171634	2186	bromodomain PHD finger transcription factor	nucleus|nucleolus|cytoplasm|microtubule cytoskeleton|NURF complex|	negative regulation of transcription from RNA polymerase II promoter|embryonic placenta development|ATP catabolic process|chromatin remodeling|transcription, DNA-templated|regulation of transcription, DNA-templated|brain development|endoderm development|anterior/posterior pattern specification|positive regulation of transcription, DNA-templated|	protein binding|DNA-dependent ATPase activity|transcription factor binding|zinc ion binding|sequence-specific DNA binding|sequence-specific DNA binding|	18	-3.0288	-4.28366	1.66954e-10	1.208e-08
MIDN	ENSG00000167470	90007	midnolin	nucleolus|			18	-1.52996	-4.28234	9.05696e-07	1.34075e-05
SAFB	ENSG00000160633	6294	scaffold attachment factor B	nucleus|	chromatin organization|transcription, DNA-templated|intracellular estrogen receptor signaling pathway|growth|hormone metabolic process|positive regulation of transcription from RNA polymerase II promoter|	nucleotide binding|core promoter binding|chromatin binding|double-stranded DNA binding|protein binding|poly(A) RNA binding|	20	-1.23496	-4.28131	7.8566e-07	1.19495e-05
GSTP1	ENSG00000084207	2950	glutathione S-transferase pi 1	extracellular space|intracellular|nucleus|cytoplasm|cytoplasm|mitochondrion|cytosol|plasma membrane|extracellular vesicular exosome|TRAF2-GSTP1 complex|	response to reactive oxygen species|negative regulation of acute inflammatory response|negative regulation of protein kinase activity|glutathione metabolic process|xenobiotic metabolic process|xenobiotic metabolic process|central nervous system development|negative regulation of biosynthetic process|negative regulation of tumor necrosis factor-mediated signaling pathway|negative regulation of int…	glutathione transferase activity|protein binding|JUN kinase binding|kinase regulator activity|S-nitrosoglutathione binding|dinitrosyl-iron complex binding|nitric oxide binding|	20	-1.51145	-4.27976	1.66927e-07	3.13596e-06
ITGB7	ENSG00000139626	3695	integrin subunit beta 7	plasma membrane|integrin complex|membrane|receptor complex|extracellular vesicular exosome|	cell adhesion|cell-matrix adhesion|integrin-mediated signaling pathway|multicellular organismal development|response to virus|extracellular matrix organization|regulation of immune response|leukocyte migration|	virus receptor activity|protein binding|metal ion binding|	20	-1.57766	-4.27962	3.48811e-05	0.000299937
IMPDH1	ENSG00000106348	3614	inosine monophosphate dehydrogenase 1	nucleus|cytoplasm|cytosol|	purine nucleobase metabolic process|GMP biosynthetic process|purine ribonucleoside monophosphate biosynthetic process|small molecule metabolic process|lymphocyte proliferation|nucleobase-containing small molecule metabolic process|oxidation-reduction process|	nucleic acid binding|DNA binding|RNA binding|IMP dehydrogenase activity|adenyl nucleotide binding|metal ion binding|	20	-1.67338	-4.27734	1.5398e-06	2.07769e-05
PAXIP1	ENSG00000157212	22976	PAX interacting protein 1	nucleus|nuclear matrix|histone methyltransferase complex|	positive regulation of histone H3-K36 methylation|vasculogenesis|DNA repair|DNA recombination|transcription, DNA-templated|response to ionizing radiation|DNA damage response, signal transduction by p53 class mediator|positive regulation of protein ubiquitination|positive regulation of histone acetylation|endothelial cell migration|positive regulation of isotype switching|histone H3-K4 methylation…	protein binding|	20	-2.05117	-4.27334	4.40898e-06	5.08063e-05
RBFA	ENSG00000101546	79863	ribosome binding factor A (putative)	cellular_component|mitochondrion|	rRNA processing|biological_process|	molecular_function|	12	-2.74982	-4.27234	8.48245e-06	8.86882e-05
PIGS	ENSG00000087111	94005	phosphatidylinositol glycan anchor biosynthesis class S	endoplasmic reticulum membrane|membrane|GPI-anchor transamidase complex|	C-terminal protein lipidation|attachment of GPI anchor to protein|post-translational protein modification|cellular protein metabolic process|	GPI-anchor transamidase activity|protein binding|	20	-1.75642	-4.26963	3.07917e-07	5.40343e-06
SPNS1	ENSG00000169682	83985	sphingolipid transporter 1 (putative)	mitochondrial inner membrane|lysosomal membrane|integral component of membrane|	lipid transport|transmembrane transport|	protein binding|	20	-1.62661	-4.26747	3.71891e-05	0.000316297
SNRPD2	ENSG00000125743	6633	small nuclear ribonucleoprotein D2 polypeptide	nucleoplasm|spliceosomal complex|U1 snRNP|U4 snRNP|U12-type spliceosomal complex|cytosol|cytosol|small nuclear ribonucleoprotein complex|methylosome|pICln-Sm protein complex|SMN-Sm protein complex|extracellular vesicular exosome|catalytic step 2 spliceosome|	spliceosomal complex assembly|spliceosomal snRNP assembly|spliceosomal snRNP assembly|mRNA splicing, via spliceosome|mRNA splicing, via spliceosome|RNA splicing|gene expression|RNA metabolic process|ncRNA metabolic process|	protein binding|poly(A) RNA binding|	18	-3.0388	-4.26472	2.05057e-07	3.75688e-06
PKD1L2	ENSG00000166473	114780	polycystin 1 like 2 (gene/pseudogene)	cell surface|integral component of membrane|	detection of chemical stimulus involved in sensory perception of sour taste|cation transport|neuropeptide signaling pathway|cellular response to acidity|	cation channel activity|calcium ion binding|carbohydrate binding|sour taste receptor activity|	18	-1.45859	-4.26462	1.55276e-07	2.95602e-06
AHCY	ENSG00000101444	191	adenosylhomocysteinase	cytoplasm|cytosol|melanosome|extracellular vesicular exosome|	sulfur amino acid metabolic process|one-carbon metabolic process|xenobiotic metabolic process|methylation|cellular nitrogen compound metabolic process|small molecule metabolic process|	adenosylhomocysteinase activity|	20	-2.90392	-4.26378	9.24059e-11	7.68894e-09
GPR89C	ENSG00000196644						18	-2.48394	-4.25983	2.30058e-10	1.47725e-08
PRPF4	ENSG00000136875	9128	pre-mRNA processing factor 4	nucleus|nucleoplasm|spliceosomal complex|spliceosomal complex|Cajal body|nuclear speck|U4/U6 snRNP|	RNA splicing, via transesterification reactions|mRNA splicing, via spliceosome|mRNA splicing, via spliceosome|RNA processing|RNA splicing|gene expression|	protein binding|	18	-2.04962	-4.2578	1.08035e-07	2.18588e-06
RBM42	ENSG00000126254	79171	RNA binding motif protein 42	nucleus|cytoplasm|		nucleotide binding|poly(A) RNA binding|	18	-1.33179	-4.25285	2.99133e-05	0.000263566
LYPD2	ENSG00000197353	137797	LY6/PLAUR domain containing 2	plasma membrane|anchored component of membrane|extracellular vesicular exosome|			16	-1.33491	-4.25269	6.36445e-07	1.00156e-05
C7orf26	ENSG00000146576	79034	chromosome 7 open reading frame 26				20	-3.12651	-4.25091	1.76142e-09	7.54032e-08
MRPS25	ENSG00000131368	64432	mitochondrial ribosomal protein S25	mitochondrion|ribosome|			20	-3.71718	-4.25049	7.2576e-10	3.73542e-08
SF3B5	ENSG00000169976	83443	splicing factor 3b subunit 5	nucleus|nucleoplasm|U12-type spliceosomal complex|	mRNA splicing, via spliceosome|RNA splicing|gene expression|		18	-2.1713	-4.24908	5.00182e-09	1.71451e-07
ELAC2	ENSG00000006744	60528	elaC ribonuclease Z 2	nucleus|mitochondrion|	mitochondrial tRNA 3'-trailer cleavage, endonucleolytic|	endonuclease activity|poly(A) RNA binding|metal ion binding|	20	-2.38734	-4.24633	7.28093e-08	1.55342e-06
SAMD10	ENSG00000130590	140700	sterile alpha motif domain containing 10				20	-1.38106	-4.24548	1.87434e-07	3.47545e-06
KTI12	ENSG00000198841	112970	KTI12 chromatin associated homolog			ATP binding|	20	-3.48854	-4.24205	9.7319e-12	1.50656e-09
DHX8	ENSG00000067596	1659	DEAH-box helicase 8	nucleus|spliceosomal complex|catalytic step 2 spliceosome|	mRNA splicing, via spliceosome|ATP catabolic process|ATP catabolic process|RNA processing|RNA splicing|	ATP-dependent RNA helicase activity|protein binding|ATP binding|identical protein binding|poly(A) RNA binding|	16	-2.35115	-4.24083	6.76936e-08	1.45987e-06
NHEJ1	ENSG00000187736	79840	non-homologous end joining factor 1	nucleus|nonhomologous end joining complex|	double-strand break repair via nonhomologous end joining|DNA recombination|central nervous system development|response to ionizing radiation|B cell differentiation|T cell differentiation|positive regulation of ligase activity|	DNA binding|protein binding|	20	-3.11595	-4.23897	9.171e-13	3.27045e-10
TRIM28	ENSG00000130726	10155	tripartite motif containing 28	nucleus|nucleus|nucleoplasm|nuclear euchromatin|nuclear heterochromatin|	negative regulation of transcription from RNA polymerase II promoter|epithelial to mesenchymal transition|DNA repair|transcription initiation from RNA polymerase II promoter|gene expression|protein ubiquitination|protein sumoylation|protein sumoylation|positive regulation of transcription factor import into nucleus|innate immune response|positive regulation of DNA repair|negative regulation of tr…	DNA binding|sequence-specific DNA binding transcription factor activity|transcription coactivator activity|transcription corepressor activity|protein kinase activity|ubiquitin-protein transferase activity|protein binding|zinc ion binding|ligase activity|ubiquitin protein ligase binding|Krueppel-associated box domain binding|sequence-specific DNA binding|poly(A) RNA binding|chromo shadow domain bi…	20	-2.29864	-4.23821	7.9119e-11	6.86959e-09
PIH1D1	ENSG00000104872	55011	PIH1 domain containing 1	pre-snoRNP complex|	box C/D snoRNP assembly|epithelial cell differentiation|		20	-1.4757	-4.23678	2.56529e-06	3.20782e-05
PMP22	ENSG00000109099	5376	peripheral myelin protein 22	plasma membrane|tight junction|integral component of membrane|compact myelin|	synaptic transmission|peripheral nervous system development|cell death|negative regulation of cell proliferation|negative regulation of neuron projection development|myelin assembly|	protein binding|	20	-1.1751	-4.23248	6.95911e-09	2.21295e-07
DDX21	ENSG00000165732	9188	DExD-box helicase 21	nucleus|nucleolus|membrane|	osteoblast differentiation|ATP catabolic process|response to virus|response to exogenous dsRNA|	double-stranded RNA binding|ATP-dependent RNA helicase activity|ATP binding|poly(A) RNA binding|	20	-1.96131	-4.23172	1.09373e-08	3.2215e-07
SRM	ENSG00000116649	6723	spermidine synthase	cytosol|	polyamine metabolic process|spermidine biosynthetic process|spermidine biosynthetic process|cellular nitrogen compound metabolic process|small molecule metabolic process|	spermidine synthase activity|protein homodimerization activity|	20	-1.40165	-4.23148	1.96693e-05	0.000182526
DTYMK	ENSG00000168393	1841	deoxythymidylate kinase	mitochondrial intermembrane space|mitochondrial matrix|cytosol|	dTDP biosynthetic process|dTTP biosynthetic process|cell cycle|cell proliferation|nucleobase-containing small molecule interconversion|response to estrogen|small molecule metabolic process|myoblast differentiation|response to cadmium ion|nucleotide phosphorylation|nucleotide phosphorylation|nucleotide phosphorylation|nucleoside monophosphate phosphorylation|nucleobase-containing small molecule me…	thymidylate kinase activity|ATP binding|nucleoside phosphate kinase activity|	20	-1.6275	-4.23093	6.93736e-06	7.50077e-05
POLRMT	ENSG00000099821	5442	RNA polymerase mitochondrial	mitochondrion|mitochondrial matrix|mitochondrial nucleoid|	transcription from mitochondrial promoter|transcription from mitochondrial promoter|transcription initiation from mitochondrial promoter|gene expression|	DNA binding|DNA-directed RNA polymerase activity|DNA-directed RNA polymerase activity|protein binding|poly(A) RNA binding|	20	-2.59624	-4.23081	2.28383e-08	5.86976e-07
GABPB1	ENSG00000104064	2553	GA binding protein transcription factor beta subunit 1	nucleus|	transcription, DNA-templated|regulation of transcription from RNA polymerase II promoter|positive regulation of transcription from RNA polymerase II promoter|	sequence-specific DNA binding transcription factor activity|protein binding|transcription regulatory region DNA binding|protein heterodimerization activity|	18	-1.58484	-4.2287	1.10961e-07	2.23151e-06
RP11-520P18.5	ENSG00000261667						20	-1.44987	-4.22572	4.94207e-06	5.60757e-05
TRIAP1	ENSG00000170855	51499	TP53 regulated inhibitor of apoptosis 1	mitochondrion|mitochondrial intermembrane space|protein complex|perinuclear region of cytoplasm|	DNA damage response, signal transduction by p53 class mediator resulting in cell cycle arrest|phospholipid transport|DNA damage response, signal transduction by p53 class mediator|cellular response to UV|negative regulation of apoptotic process|negative regulation of cysteine-type endopeptidase activity involved in apoptotic process|positive regulation of transcription from RNA polymerase II prom…	p53 binding|protein binding|phosphatidic acid transporter activity|	18	-1.94473	-4.22475	3.0206e-09	1.16902e-07
NIP7	ENSG00000132603	51388	NIP7, nucleolar pre-rRNA processing protein	nucleolus|	ribosome assembly|	protein binding|poly(A) RNA binding|	18	-2.54498	-4.22354	3.97707e-08	9.30001e-07
CDK5RAP2	ENSG00000136861	55755	CDK5 regulatory subunit associated protein 2	pericentriolar material|spindle pole|cytoplasm|Golgi apparatus|centrosome|cytosol|cytoskeleton|microtubule|cell junction|perinuclear region of cytoplasm|extracellular vesicular exosome|	G2/M transition of mitotic cell cycle|establishment of mitotic spindle orientation|microtubule cytoskeleton organization|mitotic cell cycle|microtubule bundle formation|chromosome segregation|brain development|brain development|neurogenesis|regulation of neuron differentiation|negative regulation of neuron differentiation|positive regulation of transcription, DNA-templated|negative regulation of …	protein binding|calmodulin binding|microtubule binding|tubulin binding|protein kinase binding|transcription regulatory region DNA binding|	20	-1.98356	-4.22326	1.74805e-10	1.24673e-08
NHLRC2	ENSG00000196865	374354	NHL repeat containing 2				18	-3.57541	-4.22206	3.25969e-12	6.85997e-10
PCYT2	ENSG00000185813	5833	phosphate cytidylyltransferase 2, ethanolamine	cellular_component|endoplasmic reticulum membrane|	phospholipid metabolic process|phosphatidylethanolamine biosynthetic process|phosphatidylethanolamine biosynthetic process|phospholipid biosynthetic process|small molecule metabolic process|glycerophospholipid biosynthetic process|	ethanolamine-phosphate cytidylyltransferase activity|	20	-1.64056	-4.22082	7.41582e-09	2.34326e-07
NDUFAF1	ENSG00000137806	51103	NADH:ubiquinone oxidoreductase complex assembly factor 1	cytoplasm|mitochondrial respiratory chain complex I|	mitochondrial electron transport, NADH to ubiquinone|protein complex assembly|	protein binding|unfolded protein binding|	18	-3.56599	-4.21968	1.88362e-09	7.9451e-08
NAA20	ENSG00000173418	51126	N(alpha)-acetyltransferase 20, NatB catalytic subunit	intracellular|nucleus|cytoplasm|	metabolic process|	peptide alpha-N-acetyltransferase activity|	20	-3.87908	-4.21841	6.86897e-06	7.43487e-05
AL138847.1	ENSG00000269624						18	-2.23409	-4.21765	4.50845e-09	1.57677e-07
RNF7	ENSG00000114125	9616	ring finger protein 7	nucleus|nucleus|cytoplasm|cytoplasm|Cul5-RING ubiquitin ligase complex|	intrinsic apoptotic signaling pathway in response to oxidative stress|protein ubiquitination|negative regulation of apoptotic process|protein neddylation|response to redox state|	copper ion binding|protein binding|zinc ion binding|NEDD8 ligase activity|	20	-2.6866	-4.2172	5.74409e-09	1.90547e-07
KPNA2	ENSG00000182481	3838	karyopherin subunit alpha 2	nucleus|nucleoplasm|cytoplasm|cytosol|membrane|	regulation of DNA recombination|mitotic G2 phase|DNA metabolic process|NLS-bearing protein import into nucleus|viral process|cytokine-mediated signaling pathway|	protein binding|nuclear localization sequence binding|protein transporter activity|histone deacetylase binding|poly(A) RNA binding|	20	-2.10993	-4.21209	2.73753e-06	3.38715e-05
LDB1	ENSG00000198728	8861	LIM domain binding 1	nuclear chromatin|nucleus|transcription factor complex|protein complex|	transcription-dependent tethering of RNA polymerase II gene DNA at nuclear periphery|gastrulation with mouth forming second|hair follicle development|transcription, DNA-templated|regulation of transcription, DNA-templated|transcription from RNA polymerase II promoter|multicellular organismal development|anterior/posterior axis specification|epithelial structure maintenance|Wnt signaling pathway|c…	RNA polymerase II activating transcription factor binding|enhancer sequence-specific DNA binding|chromatin binding|transcription corepressor activity|enzyme binding|LIM domain binding|LIM domain binding|protein homodimerization activity|protein self-association|	20	-1.69649	-4.21174	8.91551e-08	1.86237e-06
MRPS15	ENSG00000116898	64960	mitochondrial ribosomal protein S15	mitochondrion|mitochondrial small ribosomal subunit|nuclear membrane|	translation|	structural constituent of ribosome|poly(A) RNA binding|	20	-1.81959	-4.21069	4.06856e-09	1.46131e-07
UFC1	ENSG00000143222	51506	ubiquitin-fold modifier conjugating enzyme 1	extracellular vesicular exosome|	response to endoplasmic reticulum stress|protein ufmylation|protein ufmylation|	protein binding|UFM1 conjugating enzyme activity|	20	-1.59135	-4.21001	5.29726e-09	1.79547e-07
ZNF274	ENSG00000171606	10782	zinc finger protein 274	nucleus|nucleolus|cytoplasm|centrosome|	transcription, DNA-templated|regulation of transcription, DNA-templated|	sequence-specific DNA binding transcription factor activity|transcription corepressor activity|protein binding|sequence-specific DNA binding|metal ion binding|	20	-1.43878	-4.20614	1.57874e-05	0.000151356
AKIRIN1	ENSG00000174574	79647	akirin 1	nucleus|nuclear membrane|			20	-1.25098	-4.1984	7.13681e-06	7.67485e-05
CAP1	ENSG00000131236	10487	adenylate cyclase associated protein 1	plasma membrane|cortical actin cytoskeleton|extracellular vesicular exosome|	ameboidal cell migration|platelet degranulation|receptor-mediated endocytosis|establishment or maintenance of cell polarity|signal transduction|activation of adenylate cyclase activity|axon guidance|blood coagulation|actin cytoskeleton organization|platelet activation|	actin binding|	20	-1.24528	-4.19676	3.33554e-06	4.03702e-05
IRF1	ENSG00000125347	3659	interferon regulatory factor 1	nuclear chromatin|nucleus|nucleoplasm|cytoplasm|cytosol|	regulation of adaptive immune response|transcription from RNA polymerase II promoter|apoptotic process|cell cycle arrest|blood coagulation|negative regulation of cell proliferation|cytokine-mediated signaling pathway|positive regulation of type I interferon production|positive regulation of interferon-beta production|regulation of MyD88-dependent toll-like receptor signaling pathway|cellular resp…	RNA polymerase II core promoter proximal region sequence-specific DNA binding|DNA binding|sequence-specific DNA binding transcription factor activity|protein binding|	20	-1.53041	-4.19054	2.21937e-06	2.83603e-05
LAGE3	ENSG00000196976	8270	L antigen family member 3	cellular_component|nucleus|	tRNA processing|biological_process|	molecular_function|	20	-2.37943	-4.18901	2.04751e-08	5.35193e-07
COMMD4	ENSG00000140365	54939	COMM domain containing 4	cytoplasm|		protein binding|	20	-1.69879	-4.18882	3.00824e-08	7.37112e-07
TBC1D26	ENSG00000214946	353149	TBC1 domain family member 26		positive regulation of Rab GTPase activity|	Rab GTPase activator activity|	20	-1.37759	-4.18664	1.5297e-07	2.92326e-06
EXOSC2	ENSG00000130713	23404	exosome component 2	exosome (RNase complex)|nucleus|nucleolus|cytoplasm|cytosol|	nuclear-transcribed mRNA catabolic process, deadenylation-dependent decay|rRNA processing|gene expression|RNA metabolic process|mRNA metabolic process|positive regulation of cell growth|exonucleolytic nuclear-transcribed mRNA catabolic process involved in deadenylation-dependent decay|RNA phosphodiester bond hydrolysis, exonucleolytic|	3'-5'-exoribonuclease activity|protein binding|7S RNA binding|	18	-2.69875	-4.18583	2.6422e-10	1.6645e-08
TERF2	ENSG00000132604	7014	telomeric repeat binding factor 2	chromosome, telomeric region|nuclear telomere cap complex|male germ cell nucleus|nucleus|nucleoplasm|cytoplasm|Golgi apparatus|Mre11 complex|	telomere maintenance|telomere maintenance|age-dependent telomere shortening|in utero embryonic development|telomere maintenance via telomerase|cell cycle|telomere maintenance via telomere shortening|telomere capping|telomeric loop formation|protection from non-homologous end joining at telomere|negative regulation of telomere maintenance|positive regulation of telomere maintenance|negative regula…	chromatin binding|double-stranded telomeric DNA binding|protein binding|protein C-terminus binding|telomeric DNA binding|protein homodimerization activity|	20	-3.16663	-4.18492	1.09587e-12	3.64743e-10
NDUFB2	ENSG00000090266	4708	NADH:ubiquinone oxidoreductase subunit B2	mitochondrial inner membrane|mitochondrial respiratory chain complex I|mitochondrial respiratory chain complex I|	mitochondrial electron transport, NADH to ubiquinone|respiratory electron transport chain|cellular metabolic process|small molecule metabolic process|	NADH dehydrogenase (ubiquinone) activity|	20	-1.4027	-4.18447	4.30285e-07	7.19062e-06
MRGPRD	ENSG00000172938	116512	MAS related GPR family member D	extracellular space|plasma membrane|integral component of membrane|	G-protein coupled receptor signaling pathway|	G-protein coupled receptor activity|	18	-1.36165	-4.18402	9.96159e-08	2.03825e-06
ATP6V0C	ENSG00000185883	527	ATPase H+ transporting V0 subunit c	lysosomal membrane|endosome membrane|integral component of membrane|phagocytic vesicle membrane|proton-transporting V-type ATPase, V0 domain|extracellular vesicular exosome|	cellular iron ion homeostasis|insulin receptor signaling pathway|ATP hydrolysis coupled proton transport|proton transport|viral process|positive regulation of Wnt signaling pathway|transferrin transport|interaction with host|transmembrane transport|phagosome maturation|	protein binding|ubiquitin protein ligase binding|proton-transporting ATP synthase activity, rotational mechanism|proton-transporting ATPase activity, rotational mechanism|	12	-2.88103	-4.18104	0.000126013	0.000887335
PARS2	ENSG00000162396	25973	prolyl-tRNA synthetase 2, mitochondrial (putative)	mitochondrial matrix|	tRNA aminoacylation for protein translation|prolyl-tRNA aminoacylation|gene expression|	proline-tRNA ligase activity|ATP binding|	20	-3.45971	-4.17971	1.33831e-10	1.03562e-08
DDX23	ENSG00000174243	9416	DEAD-box helicase 23	nucleus|nucleoplasm|U5 snRNP|mitochondrion|plasma membrane|extracellular vesicular exosome|catalytic step 2 spliceosome|	cis assembly of pre-catalytic spliceosome|RNA splicing, via transesterification reactions|mRNA splicing, via spliceosome|mRNA splicing, via spliceosome|ATP catabolic process|RNA splicing|gene expression|	ATP-dependent RNA helicase activity|protein binding|ATP binding|poly(A) RNA binding|	18	-2.29956	-4.17346	9.94511e-10	4.77451e-08
RPIA	ENSG00000153574	22934	ribose 5-phosphate isomerase A	cytosol|intracellular membrane-bounded organelle|	carbohydrate metabolic process|pentose-phosphate shunt|pentose-phosphate shunt, non-oxidative branch|ribose phosphate metabolic process|small molecule metabolic process|	ribose-5-phosphate isomerase activity|monosaccharide binding|	20	-3.63493	-4.17149	1.95109e-07	3.5944e-06
PSMD6	ENSG00000163636	9861	proteasome 26S subunit, non-ATPase 6	proteasome complex|nucleoplasm|cytosol|proteasome accessory complex|extracellular vesicular exosome|	G1/S transition of mitotic cell cycle|protein polyubiquitination|mitotic cell cycle|antigen processing and presentation of peptide antigen via MHC class I|antigen processing and presentation of exogenous peptide antigen via MHC class I, TAP-dependent|ATP catabolic process|proteolysis|regulation of cellular amino acid metabolic process|apoptotic process|DNA damage response, signal transduction by …	ATPase activity|	18	-1.84794	-4.16791	3.58696e-08	8.54793e-07
ATP5B	ENSG00000110955	506	ATP synthase, H+ transporting, mitochondrial F1 complex, beta polypeptide	nucleus|mitochondrion|mitochondrial proton-transporting ATP synthase complex|mitochondrial proton-transporting ATP synthase, catalytic core|mitochondrial matrix|mitochondrial matrix|plasma membrane|cell surface|membrane|mitochondrial membrane|mitochondrial nucleoid|extracellular vesicular exosome|	angiogenesis|osteoblast differentiation|generation of precursor metabolites and energy|ATP catabolic process|lipid metabolic process|ATP biosynthetic process|negative regulation of cell adhesion involved in substrate-bound cell migration|ATP hydrolysis coupled proton transport|proton transport|respiratory electron transport chain|mitochondrial ATP synthesis coupled proton transport|mitochondrial …	transporter activity|protein binding|ATP binding|ATPase activity|transmembrane transporter activity|MHC class I protein binding|proton-transporting ATP synthase activity, rotational mechanism|proton-transporting ATPase activity, rotational mechanism|	16	-3.0976	-4.16523	7.56101e-07	1.15615e-05
XRN2	ENSG00000088930	22803	5'-3' exoribonuclease 2	nucleus|nucleolus|membrane|aggresome|	DNA catabolic process, exonucleolytic|DNA-templated transcription, termination|regulation of transcription, DNA-templated|RNA processing|mRNA processing|RNA catabolic process|spermatogenesis|cell growth|RNA metabolic process|RNA phosphodiester bond hydrolysis, exonucleolytic|RNA phosphodiester bond hydrolysis, exonucleolytic|	nuclease activity|5'-3' exoribonuclease activity|zinc ion binding|5'-3' exonuclease activity|poly(A) RNA binding|	18	-2.04956	-4.16227	8.25785e-07	1.2446e-05
METTL23	ENSG00000181038	124512	methyltransferase like 23	cytoplasm|integral component of membrane|	methylation|	methyltransferase activity|	20	-2.39698	-4.16054	2.29367e-10	1.47725e-08
TCEB1	ENSG00000154582						20	-1.91074	-4.1591	1.24915e-08	3.57386e-07
RP11-603J24.9	ENSG00000257411						12	-2.29663	-4.15642	6.91994e-08	1.49074e-06
LIF	ENSG00000128342	3976	leukemia inhibitory factor	extracellular space|cytoplasm|	blood vessel remodeling|transcription from RNA polymerase II promoter|immune response|multicellular organismal development|embryo implantation|positive regulation of cell proliferation|negative regulation of cell proliferation|stem cell maintenance|positive regulation of peptidyl-serine phosphorylation|positive regulation of peptidyl-serine phosphorylation of STAT protein|tyrosine phosphorylation…	RNA polymerase II transcription factor recruiting transcription factor activity|receptor binding|cytokine activity|leukemia inhibitory factor receptor binding|leukemia inhibitory factor receptor binding|growth factor activity|	20	-1.27006	-4.1564	7.78481e-07	1.18764e-05
PAGR1	ENSG00000263136	79447	PAXIP1 associated glutamate rich protein 1	nucleus|histone methyltransferase complex|		protein binding|	22	-1.44298	-4.15297	8.49915e-07	1.27328e-05
RPL19	ENSG00000108298	6143	ribosomal protein L19	nucleolus|cytoplasm|cytosol|membrane|cytosolic large ribosomal subunit|cytosolic large ribosomal subunit|	nuclear-transcribed mRNA catabolic process, nonsense-mediated decay|translation|translation|translational initiation|translational elongation|translational termination|SRP-dependent cotranslational protein targeting to membrane|gene expression|viral process|RNA metabolic process|mRNA metabolic process|viral life cycle|viral transcription|cellular protein metabolic process|	RNA binding|structural constituent of ribosome|structural constituent of ribosome|poly(A) RNA binding|	20	-1.66295	-4.15117	6.63864e-09	2.14147e-07
TSSK6	ENSG00000178093	83983	testis specific serine kinase 6	nucleus|	protein phosphorylation|multicellular organismal development|sperm chromatin condensation|	magnesium ion binding|protein serine/threonine kinase activity|protein binding|ATP binding|	20	-1.6182	-4.15035	6.88868e-05	0.000536532
ALG1	ENSG00000033011	56052	ALG1, chitobiosyldiphosphodolichol beta-mannosyltransferase	endoplasmic reticulum|endoplasmic reticulum membrane|membrane|integral component of membrane|	protein glycosylation|dolichol-linked oligosaccharide biosynthetic process|lipopolysaccharide biosynthetic process|protein N-linked glycosylation via asparagine|post-translational protein modification|cellular protein metabolic process|mannosylation|mannosylation|	mannosyltransferase activity|chitobiosyldiphosphodolichol beta-mannosyltransferase activity|	20	-2.66282	-4.14784	3.25669e-09	1.23408e-07
NCBP1	ENSG00000136937	4686	nuclear cap binding protein subunit 1	nucleus|nucleoplasm|cytoplasm|mitochondrion|cytosol|mRNA cap binding complex|nuclear cap binding complex|plasma membrane|ribonucleoprotein complex|	nuclear-transcribed mRNA catabolic process, nonsense-mediated decay|nuclear-transcribed mRNA catabolic process, nonsense-mediated decay|nuclear-transcribed mRNA catabolic process, nonsense-mediated decay|spliceosomal snRNP assembly|mRNA splicing, via spliceosome|transcription from RNA polymerase II promoter|transcription elongation from RNA polymerase II promoter|termination of RNA polymerase II …	RNA cap binding|RNA binding|protein binding|poly(A) RNA binding|	20	-2.14649	-4.14562	3.09646e-10	1.87383e-08
MORC2	ENSG00000133422	22880	MORC family CW-type zinc finger 2	nucleus|cytoplasm|cytosol|		ATP binding|zinc ion binding|	20	-1.1655	-4.1453	3.68324e-07	6.29745e-06
POLDIP2	ENSG00000004142	26073	DNA polymerase delta interacting protein 2	nucleus|mitochondrion|mitochondrial nucleoid|		DNA binding|	20	-1.31639	-4.14412	3.93011e-07	6.62875e-06
TBX10	ENSG00000167800	347853	T-box 10	nucleus|	transcription, DNA-templated|regulation of transcription from RNA polymerase II promoter|anatomical structure morphogenesis|	DNA binding|sequence-specific DNA binding transcription factor activity|	20	-1.82442	-4.14381	1.07531e-08	3.18136e-07
PPP2R2A	ENSG00000221914	5520	protein phosphatase 2 regulatory subunit Balpha	protein phosphatase type 2A complex|nucleoplasm|cytosol|	G2/M transition of mitotic cell cycle|nuclear-transcribed mRNA catabolic process, nonsense-mediated decay|mitotic cell cycle|protein dephosphorylation|mitotic nuclear envelope reassembly|signal transduction|gene expression|RNA metabolic process|mRNA metabolic process|response to morphine|regulation of catalytic activity|regulation of catalytic activity|	protein serine/threonine phosphatase activity|protein serine/threonine phosphatase activity|protein binding|protein phosphatase type 2A regulator activity|	20	-2.61832	-4.14081	4.11441e-08	9.55405e-07
AC131097.4	ENSG00000216921						20	-1.24893	-4.14022	8.30829e-07	1.25126e-05
GTF3C1	ENSG00000077235	2975	general transcription factor IIIC subunit 1	transcription factor TFIIIC complex|nucleus|nucleoplasm|nucleolus|membrane|ribonucleoprotein complex|	transcription, DNA-templated|transcription from RNA polymerase III promoter|transcription from RNA polymerase III promoter|rRNA transcription|tRNA transcription|gene expression|5S class rRNA transcription from RNA polymerase III type 1 promoter|tRNA transcription from RNA polymerase III promoter|	DNA binding|protein binding|	14	-2.66531	-4.13506	7.04189e-06	7.58913e-05
CTD-2545G14.7	ENSG00000262526						16	-2.8517	-4.13181	6.0654e-11	5.58184e-09
HMGN2	ENSG00000198830	3151	high mobility group nucleosomal binding domain 2	chromatin|nucleus|cytoplasm|		nucleosomal DNA binding|poly(A) RNA binding|	18	-2.77163	-4.12948	3.21138e-07	5.58987e-06
PSMG3	ENSG00000157778	84262	proteasome assembly chaperone 3				16	-2.69842	-4.12812	2.22757e-07	4.04774e-06
OR4F16	ENSG00000185097	81399	olfactory receptor family 4 subfamily F member 16				18	-2.87702	-4.12621	1.68879e-09	7.33154e-08
RGS19	ENSG00000171700	10287	regulator of G-protein signaling 19	cytoplasm|Golgi apparatus|heterotrimeric G-protein complex|plasma membrane|brush border|membrane|clathrin-coated vesicle|	autophagy|G-protein coupled receptor signaling pathway|small GTPase mediated signal transduction|termination of G-protein coupled receptor signaling pathway|positive regulation of GTPase activity|	G-protein alpha-subunit binding|GTPase activator activity|protein binding|	20	-1.85328	-4.1238	7.43238e-09	2.34478e-07
DCTN3	ENSG00000137100	11258	dynactin subunit 3	condensed chromosome kinetochore|centrosome|spindle|cytosol|dynactin complex|midbody|cleavage furrow|perinuclear region of cytoplasm|	G2/M transition of mitotic cell cycle|mitotic cell cycle|cytokinesis|microtubule-based process|mitotic nuclear division|antigen processing and presentation of exogenous peptide antigen via MHC class II|	structural molecule activity|protein binding|	20	-1.69676	-4.12371	2.47344e-10	1.56808e-08
CSTF2	ENSG00000101811	1478	cleavage stimulation factor subunit 2	nucleus|nucleoplasm|mRNA cleavage and polyadenylation specificity factor complex|cleavage body|	mRNA splicing, via spliceosome|transcription from RNA polymerase II promoter|termination of RNA polymerase II transcription|mRNA polyadenylation|mRNA cleavage|RNA splicing|gene expression|mRNA 3'-end processing|	nucleotide binding|RNA binding|protein binding|poly(A) RNA binding|	20	-2.49063	-4.12356	2.00637e-10	1.35821e-08
EWSR1	ENSG00000182944	2130	EWS RNA binding protein 1	nucleus|cytoplasm|plasma membrane|	transcription, DNA-templated|regulation of transcription, DNA-templated|	nucleotide binding|RNA binding|protein binding|calmodulin binding|zinc ion binding|identical protein binding|poly(A) RNA binding|	20	-1.95576	-4.12344	3.51808e-10	2.07245e-08
RPSAP58	ENSG00000205246	388524	ribosomal protein SA pseudogene 58				20	-2.71444	-4.12335	6.22803e-06	6.85532e-05
ZC3H18	ENSG00000158545	124245	zinc finger CCCH-type containing 18	nucleus|		poly(A) RNA binding|metal ion binding|	20	-1.37463	-4.12268	1.60024e-10	1.17488e-08
HSPA14	ENSG00000187522	51182	heat shock protein family A (Hsp70) member 14	cytosol|ribosome|membrane|	'de novo' cotranslational protein folding|	protein binding|ATP binding|	20	-3.55911	-4.12222	6.28262e-11	5.70291e-09
DYNC1H1	ENSG00000197102	1778	dynein cytoplasmic 1 heavy chain 1	centrosome|cytosol|cytoplasmic dynein complex|microtubule|membrane|extracellular vesicular exosome|	G2/M transition of mitotic cell cycle|mitotic cell cycle|ATP catabolic process|transport|microtubule-based movement|mitotic spindle organization|cell death|antigen processing and presentation of exogenous peptide antigen via MHC class II|cytoplasmic mRNA processing body assembly|stress granule assembly|	microtubule motor activity|protein binding|ATP binding|ATPase activity|poly(A) RNA binding|	20	-2.17386	-4.12164	1.50614e-07	2.89021e-06
CPSF1	ENSG00000071894	29894	cleavage and polyadenylation specific factor 1	nucleoplasm|mRNA cleavage and polyadenylation specificity factor complex|	mRNA splicing, via spliceosome|transcription from RNA polymerase II promoter|termination of RNA polymerase II transcription|mRNA polyadenylation|mRNA cleavage|mRNA export from nucleus|RNA splicing|gene expression|mRNA 3'-end processing|	mRNA 3'-UTR binding|protein binding|	20	-3.54158	-4.11989	2.65255e-10	1.66577e-08
EXOC5	ENSG00000070367	10640	exocyst complex component 5	cytoplasm|cytosol|	exocytosis|post-Golgi vesicle-mediated transport|protein transport|cellular protein metabolic process|vesicle docking|membrane organization|	protein N-terminus binding|	20	-1.44112	-4.1197	1.392e-07	2.71203e-06
GZMM	ENSG00000197540	3004	granzyme M	extracellular region|membrane|	proteolysis|apoptotic process|cytolysis|innate immune response|	serine-type endopeptidase activity|serine-type peptidase activity|	20	-1.45867	-4.11486	1.86727e-06	2.44681e-05
HIST1H2AM	ENSG00000233224	8336	histone cluster 1 H2A family member m				18	-1.50869	-4.11444	2.77244e-06	3.42397e-05
RAD51L3-RFFL	ENSG00000267618	100529207	RAD51L3-RFFL readthrough				14	-2.7151	-4.11416	7.88644e-07	1.19857e-05
PCNA	ENSG00000132646	5111	proliferating cell nuclear antigen	nucleus|nucleoplasm|DNA replication factor C complex|cytoplasm|centrosome|nuclear replication fork|PCNA complex|extracellular vesicular exosome|PCNA-p21 complex|	G1/S transition of mitotic cell cycle|regulation of transcription involved in G1/S transition of mitotic cell cycle|mitotic cell cycle|telomere maintenance via recombination|telomere maintenance|DNA replication|DNA strand elongation involved in DNA replication|leading strand elongation|regulation of DNA replication|DNA repair|DNA repair|transcription-coupled nucleotide-excision repair|base-excisi…	purine-specific mismatch base pair DNA N-glycosylase activity|protein binding|DNA polymerase processivity factor activity|receptor tyrosine kinase binding|dinucleotide insertion or deletion binding|MutLalpha complex binding|identical protein binding|DNA polymerase binding|	14	-2.67156	-4.11008	2.572e-05	0.000230844
WDR61	ENSG00000140395	80349	WD repeat domain 61	nucleus|cytoplasm|Cdc73/Paf1 complex|transcriptionally active chromatin|Ski complex|	transcription, DNA-templated|Wnt signaling pathway|positive regulation of transcription elongation from RNA polymerase II promoter|negative regulation of myeloid cell differentiation|positive regulation of transcription from RNA polymerase II promoter|positive regulation of histone H3-K4 methylation|histone H3-K4 trimethylation|positive regulation of histone H3-K79 methylation|	protein binding|	20	-1.90699	-4.10973	3.00386e-09	1.1648e-07
RP11-618P17.4	ENSG00000266953						12	-1.92342	-4.10679	4.38976e-07	7.31749e-06
POLR2E	ENSG00000099817	5434	RNA polymerase II subunit E	nucleus|nucleoplasm|DNA-directed RNA polymerase II, core complex|DNA-directed RNA polymerase III complex|DNA-directed RNA polymerase I complex|cytosol|	mRNA splicing, via spliceosome|DNA repair|transcription-coupled nucleotide-excision repair|nucleotide-excision repair|transcription from RNA polymerase I promoter|transcription from RNA polymerase II promoter|transcription from RNA polymerase II promoter|transcription initiation from RNA polymerase II promoter|transcription elongation from RNA polymerase II promoter|7-methylguanosine mRNA capping…	RNA polymerase I activity|RNA polymerase II activity|RNA polymerase III activity|DNA binding|DNA-directed RNA polymerase activity|protein binding|	18	-2.9202	-4.10672	9.3247e-08	1.93369e-06
HMHA1	ENSG00000180448						20	-1.11642	-4.10664	1.27334e-07	2.50282e-06
TANGO6	ENSG00000103047	79613	transport and golgi organization 6 homolog	integral component of membrane|			20	-1.71644	-4.10578	2.79134e-06	3.4388e-05
XPO6	ENSG00000169180	23214	exportin 6	nucleus|nucleus|nucleolus|cytoplasm|cytoplasm|plasma membrane|	protein export from nucleus|	protein binding|Ran GTPase binding|protein transporter activity|	20	-1.10498	-4.09973	8.88275e-10	4.34776e-08
CXXC1	ENSG00000154832	30827	CXXC finger protein 1	nucleus|nucleoplasm|nuclear matrix|nuclear speck|histone methyltransferase complex|Set1C/COMPASS complex|	transcription, DNA-templated|regulation of transcription, DNA-templated|activation of signaling protein activity involved in unfolded protein response|endoplasmic reticulum unfolded protein response|cellular protein metabolic process|positive regulation of transcription, DNA-templated|histone H3-K4 methylation|	protein binding|zinc ion binding|histone methyltransferase activity (H3-K4 specific)|unmethylated CpG binding|	20	-1.74819	-4.09938	2.63923e-06	3.28588e-05
TUBB	ENSG00000196230	203068	tubulin beta class I	nucleus|nuclear envelope lumen|cytosol|cytoskeleton|microtubule|microtubule|cytoplasmic ribonucleoprotein granule|cell body|extracellular vesicular exosome|	G2/M transition of mitotic cell cycle|mitotic cell cycle|GTP catabolic process|cellular component movement|microtubule-based process|cellular process|cytoskeleton-dependent intracellular transport|natural killer cell mediated cytotoxicity|spindle assembly|protein polymerization|cell division|	GTPase activity|structural molecule activity|structural constituent of cytoskeleton|protein binding|GTP binding|protein domain specific binding|protein complex binding|GTPase activating protein binding|MHC class I protein binding|	16	-2.91278	-4.09874	1.22012e-07	2.42204e-06
SETD2	ENSG00000181555	29072	SET domain containing 2	nucleus|chromosome|	angiogenesis|morphogenesis of a branching structure|neural tube closure|mismatch repair|regulation of transcription, DNA-templated|transcription elongation from RNA polymerase II promoter|regulation of mRNA export from nucleus|forebrain development|nucleosome organization|cell migration involved in vasculogenesis|mesoderm morphogenesis|embryonic cranial skeleton morphogenesis|stem cell developmen…	protein binding|histone-lysine N-methyltransferase activity|histone-lysine N-methyltransferase activity|	20	-1.19053	-4.09802	2.02876e-06	2.62569e-05
VSTM2L	ENSG00000132821	128434	V-set and transmembrane domain containing 2 like			protein binding|	20	-1.3068	-4.09752	2.9926e-05	0.000263566
RP11-126K1.2	ENSG00000232671						18	-1.30364	-4.09476	7.94842e-07	1.20615e-05
CDK4	ENSG00000135446	1019	cyclin dependent kinase 4	cyclin-dependent protein kinase holoenzyme complex|chromatin|nucleus|nucleoplasm|transcription factor complex|nucleolus|cytosol|cytosol|tight junction|nuclear membrane|perinuclear region of cytoplasm|	G1/S transition of mitotic cell cycle|mitotic cell cycle|protein phosphorylation|signal transduction|circadian rhythm|positive regulation of cell proliferation|response to toxic substance|response to lead ion|regulation of gene expression|positive regulation of G2/M transition of mitotic cell cycle|organ regeneration|response to testosterone|response to drug|positive regulation of apoptotic proce…	cyclin-dependent protein serine/threonine kinase activity|protein binding|ATP binding|cyclin binding|protein complex binding|	18	-2.6166	-4.09316	4.56026e-11	4.42079e-09
TRUB2	ENSG00000167112	26995	TruB pseudouridine synthase family member 2		pseudouridine synthesis|tRNA processing|	pseudouridine synthase activity|poly(A) RNA binding|	20	-2.45537	-4.08958	1.92722e-10	1.32076e-08
CTD-2278I10.6	ENSG00000269307						20	-1.19175	-4.08916	0.000115991	0.000829038
FAM106A	ENSG00000213077	80039	family with sequence similarity 106 member A				20	-1.15381	-4.08858	2.98649e-08	7.32682e-07
RP11-487E13.1	ENSG00000249008						12	-2.85641	-4.08794	3.74695e-05	0.000318411
RPS10	ENSG00000124614	6204	ribosomal protein S10	nucleolus|cytoplasm|cytosol|ribosome|membrane|cytosolic small ribosomal subunit|extracellular vesicular exosome|	nuclear-transcribed mRNA catabolic process, nonsense-mediated decay|translation|translation|translational initiation|translational elongation|translational termination|SRP-dependent cotranslational protein targeting to membrane|gene expression|viral process|RNA metabolic process|mRNA metabolic process|viral life cycle|viral transcription|cellular protein metabolic process|	protein binding|poly(A) RNA binding|	18	-2.42766	-4.08696	8.97311e-09	2.75258e-07
TXNDC17	ENSG00000129235	84817	thioredoxin domain containing 17	cytosol|extracellular vesicular exosome|	tumor necrosis factor-mediated signaling pathway|oxidation-reduction process|	peroxidase activity|protein binding|electron carrier activity|protein-disulfide reductase activity|	20	-1.7357	-4.0856	5.25005e-10	2.89623e-08
EMC2	ENSG00000104412	9694	ER membrane protein complex subunit 2	nucleus|cytoplasm|mitochondrion|endoplasmic reticulum|ER membrane protein complex|			20	-1.85936	-4.08556	4.48957e-07	7.4567e-06
SDHAF1	ENSG00000205138	644096	succinate dehydrogenase complex assembly factor 1	mitochondrion|mitochondrial matrix|	iron-sulfur cluster assembly|mitochondrial respiratory chain complex II assembly|		20	-2.29567	-4.08373	6.09608e-06	6.75201e-05
SPRTN	ENSG00000010072	83932	SprT-like N-terminal domain	nucleus|chromosome|nuclear speck|	cellular response to DNA damage stimulus|response to UV|translesion synthesis|translesion synthesis|positive regulation of protein ubiquitination|	DNA binding|protein binding|ubiquitin binding|metal ion binding|K63-linked polyubiquitin binding|	20	-1.81582	-4.08137	1.03585e-07	2.10866e-06
CDK9	ENSG00000136807	1025	cyclin dependent kinase 9	nucleus|nucleoplasm|cytoplasm|transcription elongation factor complex|positive transcription elongation factor complex b|membrane|PML body|intracellular membrane-bounded organelle|	DNA repair|regulation of DNA repair|transcription, DNA-templated|transcription from RNA polymerase II promoter|transcription initiation from RNA polymerase II promoter|transcription elongation from RNA polymerase II promoter|protein phosphorylation|transforming growth factor beta receptor signaling pathway|cell proliferation|gene expression|viral process|regulation of histone modification|replica…	DNA binding|chromatin binding|protein kinase activity|cyclin-dependent protein serine/threonine kinase activity|protein binding|ATP binding|RNA polymerase II carboxy-terminal domain kinase activity|snRNA binding|transcription regulatory region DNA binding|	18	-2.03374	-4.08098	3.42488e-05	0.000296082
COX5B	ENSG00000135940	1329	cytochrome c oxidase subunit 5B	mitochondrion|mitochondrial inner membrane|extracellular vesicular exosome|	respiratory gaseous exchange|respiratory electron transport chain|cellular metabolic process|small molecule metabolic process|hydrogen ion transmembrane transport|hydrogen ion transmembrane transport|	cytochrome-c oxidase activity|metal ion binding|	18	-1.38136	-4.08025	1.33077e-07	2.60801e-06
PPFIA1	ENSG00000131626	8500	PTPRF interacting protein alpha 1	cytoplasm|focal adhesion|	cell-matrix adhesion|signal transduction|negative regulation of stress fiber assembly|negative regulation of establishment of protein localization to plasma membrane|	signal transducer activity|protein binding|	18	-1.63823	-4.08	7.62842e-10	3.88621e-08
ECSIT	ENSG00000130159	51295	ECSIT signalling integrator	nucleus|transcription factor complex|cytoplasm|mitochondrion|	mesoderm formation|BMP signaling pathway|innate immune response|regulation of oxidoreductase activity|oxidation-reduction process|	sequence-specific DNA binding transcription factor activity|signal transducer activity|protein binding|oxidoreductase activity, acting on NAD(P)H|	20	-2.09752	-4.07845	1.23031e-05	0.000121691
MRPL3	ENSG00000114686	11222	mitochondrial ribosomal protein L3	mitochondrial large ribosomal subunit|	translation|	RNA binding|structural constituent of ribosome|poly(A) RNA binding|	20	-1.74557	-4.07623	4.90669e-08	1.10845e-06
GNB1L	ENSG00000185838	54584	G protein subunit beta 1 like	cytoplasm|cytoplasmic side of plasma membrane|	G-protein coupled receptor signaling pathway|social behavior|intracellular signal transduction|	molecular_function|	20	-3.04472	-4.07526	7.71317e-06	8.21942e-05
BAG6	ENSG00000204463	7917	BCL2 associated athanogene 6	nucleus|cytosol|BAT3 complex|	kidney development|immune system process|ubiquitin-dependent protein catabolic process|transport|synaptonemal complex assembly|spermatogenesis|brain development|embryo development|chromatin modification|internal peptidyl-lysine acetylation|cell differentiation|lung development|negative regulation of proteasomal ubiquitin-dependent protein catabolic process|regulation of cell proliferation|intrins…	protein binding|Hsp70 protein binding|polyubiquitin binding|ribosome binding|proteasome binding|	20	-1.24615	-4.07382	9.82868e-05	0.000721879
NPFF	ENSG00000139574	8620	neuropeptide FF-amide peptide precursor	extracellular region|extracellular space|dendrite|vesicle|perikaryon|axon terminus|	acute inflammatory response to antigenic stimulus|regulation of membrane depolarization|positive regulation of cytosolic calcium ion concentration|neuropeptide signaling pathway|synaptic transmission|negative regulation of heart rate|spinal cord development|vasopressin secretion|negative regulation of appetite|response to drug|response to morphine|positive regulation of blood pressure|negative re…	G-protein coupled receptor binding|receptor binding|neuropeptide hormone activity|	20	-1.70698	-4.07336	6.73136e-06	7.30572e-05
TSC2	ENSG00000103197	7249	tuberous sclerosis 2	nucleus|cytoplasm|cytoplasm|Golgi apparatus|cytosol|cytosol|caveola|membrane|dendrite|growth cone|TSC1-TSC2 complex|neuronal cell body|perinuclear region of cytoplasm|	response to hypoxia|neural tube closure|negative regulation of protein kinase activity|protein import into nucleus|endocytosis|acute-phase response|cell cycle arrest|epidermal growth factor receptor signaling pathway|heart development|protein localization|negative regulation of cell proliferation|insulin receptor signaling pathway|fibroblast growth factor receptor signaling pathway|phosphatidylin…	GTPase activator activity|protein binding|phosphatase binding|protein homodimerization activity|protein heterodimerization activity|14-3-3 protein binding|	20	-1.71996	-4.073	9.32758e-07	1.3747e-05
ATP6V1B2	ENSG00000147416	526	ATPase H+ transporting V1 subunit B2	lysosomal membrane|cytosol|cytosol|plasma membrane|microvillus|endomembrane system|integral component of membrane|proton-transporting V-type ATPase, V1 domain|melanosome|intracellular membrane-bounded organelle|extracellular vesicular exosome|	cellular iron ion homeostasis|insulin receptor signaling pathway|ATP hydrolysis coupled proton transport|proton transport|transferrin transport|ATP metabolic process|interaction with host|transmembrane transport|phagosome maturation|	ATP binding|hydrogen ion transmembrane transporter activity|proton-transporting ATPase activity, rotational mechanism|	20	-1.73832	-4.07179	6.25766e-09	2.03859e-07
ZNF622	ENSG00000173545	90441	zinc finger protein 622	nucleolus|cytoplasm|Golgi apparatus|	intrinsic apoptotic signaling pathway in response to oxidative stress|positive regulation of kinase activity|positive regulation of apoptotic process|positive regulation of MAPK cascade|positive regulation of JNK cascade|	protein binding|zinc ion binding|poly(A) RNA binding|	20	-1.70383	-4.06993	1.24988e-10	9.82184e-09
FDXR	ENSG00000161513	2232	ferredoxin reductase	mitochondrion|mitochondrial inner membrane|mitochondrial matrix|	generation of precursor metabolites and energy|steroid biosynthetic process|cholesterol metabolic process|small molecule metabolic process|oxidation-reduction process|NADPH oxidation|	ferredoxin-NADP+ reductase activity|protein binding|NADPH-adrenodoxin reductase activity|NADPH binding|	20	-2.78393	-4.06955	1.28671e-09	5.86988e-08
RNF222	ENSG00000189051	643904	ring finger protein 222	integral component of membrane|		zinc ion binding|	20	-1.29824	-4.06868	3.15886e-05	0.000275951
TIMELESS	ENSG00000111602	8914	timeless circadian clock	nuclear chromatin|nucleus|nucleus|	negative regulation of transcription from RNA polymerase II promoter|morphogenesis of an epithelium|transcription, DNA-templated|cellular response to DNA damage stimulus|mitotic nuclear division|circadian rhythm|detection of abiotic stimulus|response to abiotic stimulus|embryo development|lung development|regulation of circadian rhythm|cell cycle phase transition|negative regulation of transcript…	protein binding|protein homodimerization activity|protein heterodimerization activity|	20	-1.93796	-4.06724	1.35922e-05	0.000132278
CLASP2	ENSG00000163539	23122	cytoplasmic linker associated protein 2	condensed chromosome kinetochore|cytoplasm|Golgi apparatus|trans-Golgi network|microtubule organizing center|kinetochore microtubule|cytosol|microtubule|cytoplasmic microtubule|plasma membrane|cell cortex|membrane|ruffle membrane|	mitotic cell cycle|microtubule nucleation|negative regulation of microtubule depolymerization|mitotic nuclear division|establishment or maintenance of cell polarity|axon guidance|microtubule organizing center organization|regulation of microtubule polymerization or depolymerization|regulation of microtubule-based process|microtubule anchoring|fucosylation|	protein binding|galactoside 2-alpha-L-fucosyltransferase activity|microtubule plus-end binding|	20	-1.80372	-4.06469	5.31105e-08	1.18505e-06
LLPH	ENSG00000139233	84298	LLP homolog, long-term synaptic facilitation			poly(A) RNA binding|	18	-2.3344	-4.06311	4.17419e-07	6.99317e-06
SP2	ENSG00000167182	6668	Sp2 transcription factor	nucleus|	in utero embryonic development|transcription, DNA-templated|regulation of transcription from RNA polymerase II promoter|immune response|multicellular organism growth|fibroblast proliferation|embryonic organ development|cardiovascular system development|	DNA binding|histone deacetylase binding|metal ion binding|	20	-1.30152	-4.06212	7.17657e-06	7.70931e-05
ILF3	ENSG00000129351	3609	interleukin enhancer binding factor 3	nucleus|nucleus|nucleolus|cytoplasm|mitochondrion|membrane|ribonucleoprotein complex|	M phase|transcription, DNA-templated|protein phosphorylation|negative regulation of translation|negative regulation of viral genome replication|negative regulation of transcription, DNA-templated|positive regulation of transcription, DNA-templated|defense response to virus|	DNA binding|RNA binding|double-stranded RNA binding|protein binding|poly(A) RNA binding|	18	-1.83078	-4.06089	4.34353e-06	5.01318e-05
APBA3	ENSG00000011132	9546	amyloid beta precursor protein binding family A member 3	perinuclear region of cytoplasm|	in utero embryonic development|synaptic transmission|regulation of gene expression|protein transport|negative regulation of catalytic activity|	beta-amyloid binding|enzyme inhibitor activity|protein binding|enzyme binding|	20	-1.16502	-4.05829	5.0835e-08	1.14321e-06
DGAT2	ENSG00000062282	84649	diacylglycerol O-acyltransferase 2	mitochondrion|endoplasmic reticulum|endoplasmic reticulum membrane|lipid particle|integral component of membrane|integral component of endoplasmic reticulum membrane|integral component of endoplasmic reticulum membrane|perinuclear region of cytoplasm|	glycerol metabolic process|phospholipid metabolic process|triglyceride biosynthetic process|triglyceride biosynthetic process|triglyceride biosynthetic process|lipid storage|low-density lipoprotein particle clearance|long-chain fatty-acyl-CoA metabolic process|cellular triglyceride homeostasis|acylglycerol acyl-chain remodeling|retinol metabolic process|cholesterol homeostasis|cellular lipid meta…	2-acylglycerol O-acyltransferase activity|diacylglycerol O-acyltransferase activity|protein homodimerization activity|retinol O-fatty-acyltransferase activity|	20	-1.19685	-4.05555	3.50846e-08	8.40095e-07
IQGAP3	ENSG00000183856	128239	IQ motif containing GTPase activating protein 3	cytoplasm|cell-cell junction|lateral plasma membrane|	G1/S transition of mitotic cell cycle|activation of MAPK activity|Ras protein signal transduction|regulation of cell size|positive regulation of gene expression|negative regulation of gene expression|positive regulation of Ras GTPase activity|positive regulation of mammary gland epithelial cell proliferation|ERK1 and ERK2 cascade|cellular response to organic substance|	Ras GTPase activator activity|calmodulin binding|Rho GTPase binding|	20	-1.5104	-4.05411	0.000103027	0.000749072
PAAF1	ENSG00000175575	80227	proteasomal ATPase associated factor 1	proteasome complex|	viral process|	protein binding|	20	-1.27314	-4.05168	1.80852e-06	2.38864e-05
KLF1	ENSG00000105610	10661	Kruppel like factor 1	nuclear chromatin|nucleus|	in utero embryonic development|liver development|chromatin remodeling|transcription, DNA-templated|erythrocyte differentiation|embryonic hemopoiesis|erythrocyte maturation|positive regulation of transcription, DNA-templated|cellular response to peptide|	core promoter proximal region sequence-specific DNA binding|sequence-specific DNA binding transcription factor activity|transcription regulatory region DNA binding|metal ion binding|	20	-1.59746	-4.05113	7.39548e-09	2.34053e-07
CUL3	ENSG00000036257	8452	cullin 3	Golgi membrane|nucleus|polar microtubule|membrane|Cul3-RING ubiquitin ligase complex|extracellular vesicular exosome|	G1/S transition of mitotic cell cycle|mitotic anaphase|protein polyubiquitination|cytokinesis|trophectodermal cellular morphogenesis|protein monoubiquitination|ER to Golgi vesicle-mediated transport|cell cycle arrest|integrin-mediated signaling pathway|gastrulation|cyclin catabolic process|positive regulation of cell proliferation|Wnt signaling pathway|cell migration|protein ubiquitination|stem c…	ubiquitin-protein transferase activity|protein binding|cyclin binding|POZ domain binding|ubiquitin protein ligase binding|	20	-1.58375	-4.04797	6.07311e-08	1.33421e-06
FAU	ENSG00000149806	2197	FAU, ubiquitin like and ribosomal protein S30 fusion	cellular_component|extracellular space|cytosol|small ribosomal subunit|cytosolic small ribosomal subunit|	nuclear-transcribed mRNA catabolic process, nonsense-mediated decay|innate immune response in mucosa|translation|translation|translational initiation|translational elongation|translational termination|SRP-dependent cotranslational protein targeting to membrane|biological_process|gene expression|viral process|RNA metabolic process|mRNA metabolic process|viral life cycle|viral transcription|antibac…	RNA binding|structural constituent of ribosome|poly(A) RNA binding|	16	-2.96422	-4.04535	0.00078936	0.00414369
RP11-160N1.10	ENSG00000204814						20	-1.06918	-4.04455	1.93226e-06	2.52369e-05
NOP58	ENSG00000055044	51602	NOP58 ribonucleoprotein	nucleus|nucleolus|nucleolus|small nucleolar ribonucleoprotein complex|cytoplasm|Cajal body|membrane|box C/D snoRNP complex|pre-snoRNP complex|	rRNA processing|snRNP protein import into nucleus|cell growth|	protein binding|snoRNA binding|poly(A) RNA binding|	20	-2.43756	-4.04349	2.00892e-07	3.69073e-06
EPT1	ENSG00000138018						20	-1.80656	-4.04148	3.37073e-07	5.83305e-06
UQCRC1	ENSG00000010256	7384	ubiquinol-cytochrome c reductase core protein I	mitochondrion|mitochondrial inner membrane|mitochondrial respiratory chain|mitochondrial respiratory chain complex III|	oxidative phosphorylation|mitochondrial electron transport, ubiquinol to cytochrome c|aerobic respiration|response to activity|respiratory electron transport chain|response to alkaloid|cellular metabolic process|small molecule metabolic process|oxidation-reduction process|hydrogen ion transmembrane transport|	ubiquinol-cytochrome-c reductase activity|protein complex binding|metal ion binding|	20	-3.24951	-4.04065	1.88582e-09	7.9451e-08
C8orf17	ENSG00000250733	100507249	chromosome 8 open reading frame 17	endoplasmic reticulum membrane|			20	-1.0406	-4.0406	2.2983e-08	5.89179e-07
VPRBP	ENSG00000145041						18	-2.58968	-4.0377	4.31887e-06	4.98831e-05
NDUFB5	ENSG00000136521	4711	NADH:ubiquinone oxidoreductase subunit B5	nucleus|mitochondrion|mitochondrial inner membrane|mitochondrial respiratory chain complex I|mitochondrial respiratory chain complex I|integral component of membrane|	mitochondrial electron transport, NADH to ubiquinone|respiratory electron transport chain|cellular metabolic process|small molecule metabolic process|	NADH dehydrogenase (ubiquinone) activity|	20	-2.18212	-4.03266	1.05593e-07	2.14298e-06
ANKRD52	ENSG00000139645	283373	ankyrin repeat domain 52			protein binding|	20	-1.83972	-4.02716	9.81821e-12	1.50823e-09
STT3A	ENSG00000134910	3703	STT3A, catalytic subunit of the oligosaccharyltransferase complex	endoplasmic reticulum membrane|oligosaccharyltransferase complex|oligosaccharyltransferase complex|membrane|integral component of membrane|	protein N-linked glycosylation via asparagine|protein N-linked glycosylation via asparagine|protein N-linked glycosylation via asparagine|co-translational protein modification|post-translational protein modification|cellular protein metabolic process|	dolichyl-diphosphooligosaccharide-protein glycotransferase activity|dolichyl-diphosphooligosaccharide-protein glycotransferase activity|protein binding|	20	-1.43535	-4.02646	0.000327126	0.00198381
ATP5J2	ENSG00000241468	9551	ATP synthase, H+ transporting, mitochondrial Fo complex subunit F2	nucleus|mitochondrial inner membrane|mitochondrial proton-transporting ATP synthase complex|mitochondrial proton-transporting ATP synthase complex|integral component of membrane|proton-transporting ATP synthase complex, coupling factor F(o)|extracellular vesicular exosome|	ATP catabolic process|proton transport|respiratory electron transport chain|mitochondrial ATP synthesis coupled proton transport|mitochondrial ATP synthesis coupled proton transport|cellular metabolic process|small molecule metabolic process|	ATPase activity|transmembrane transporter activity|	18	-2.6922	-4.02621	2.52764e-10	1.59737e-08
CHFR	ENSG00000072609	55743	checkpoint with forkhead and ring finger domains	nucleus|PML body|	protein polyubiquitination|ubiquitin-dependent protein catabolic process|mitotic nuclear division|mitotic cell cycle checkpoint|mitotic cell cycle checkpoint|modification-dependent protein catabolic process|	nucleotide binding|ubiquitin-protein transferase activity|protein binding|zinc ion binding|ligase activity|	20	-1.31816	-4.02492	1.49573e-09	6.63773e-08
SRSF5	ENSG00000100650	6430	serine and arginine rich splicing factor 5	nucleus|nucleoplasm|nucleolus|cytoplasm|nuclear speck|	mRNA splicing, via spliceosome|transcription from RNA polymerase II promoter|termination of RNA polymerase II transcription|mRNA splice site selection|mRNA processing|mRNA export from nucleus|RNA splicing|response to wounding|gene expression|mRNA 3'-end processing|regulation of cell cycle|	nucleotide binding|protein binding|poly(A) RNA binding|RS domain binding|	18	-1.90896	-4.02426	1.03056e-06	1.47866e-05
FURIN	ENSG00000140564	5045	furin, paired basic amino acid cleaving enzyme	Golgi membrane|Golgi lumen|trans-Golgi network|plasma membrane|cell surface|membrane|integral component of membrane|trans-Golgi network transport vesicle|membrane raft|extracellular vesicular exosome|	signal peptide processing|proteolysis|transforming growth factor beta receptor signaling pathway|Notch signaling pathway|cell proliferation|regulation of signal transduction|negative regulation of endopeptidase activity|viral process|protein processing|protein processing|peptide hormone processing|peptidyl-glutamic acid carboxylation|viral life cycle|virion assembly|viral protein processing|extra…	protease binding|endopeptidase activity|serine-type endopeptidase activity|serine-type endopeptidase inhibitor activity|peptidase activity|peptide binding|metal ion binding|nerve growth factor binding|	20	-1.36434	-4.02385	2.19321e-07	3.99256e-06
THOC6	ENSG00000131652	79228	THO complex 6	transcription export complex|THO complex|THO complex part of transcription export complex|nucleus|nuclear speck|	mRNA processing|mRNA export from nucleus|apoptotic process|central nervous system development|RNA splicing|negative regulation of apoptotic process|viral mRNA export from host cell nucleus|	RNA binding|	20	-2.27477	-4.02202	1.63953e-07	3.09173e-06
POP1	ENSG00000104356	10940	POP1 homolog, ribonuclease P/MRP subunit	ribonuclease MRP complex|extracellular space|nucleolar ribonuclease P complex|	tRNA 5'-leader removal|tRNA catabolic process|RNA phosphodiester bond hydrolysis|RNA phosphodiester bond hydrolysis, endonucleolytic|RNA phosphodiester bond hydrolysis, endonucleolytic|	ribonuclease MRP activity|ribonuclease P activity|protein binding|poly(A) RNA binding|	20	-1.81672	-4.02111	1.07211e-06	1.5271e-05
RPS11	ENSG00000142534	6205	ribosomal protein S11	cytosol|ribosome|membrane|cytosolic small ribosomal subunit|extracellular vesicular exosome|	nuclear-transcribed mRNA catabolic process, nonsense-mediated decay|translation|translation|translation|translational initiation|translational elongation|translational termination|SRP-dependent cotranslational protein targeting to membrane|gene expression|viral process|RNA metabolic process|mRNA metabolic process|viral life cycle|viral transcription|cellular protein metabolic process|	structural constituent of ribosome|protein binding|rRNA binding|poly(A) RNA binding|	20	-2.41514	-4.0206	6.12611e-07	9.7017e-06
ATP6V0D1	ENSG00000159720	9114	ATPase H+ transporting V0 subunit d1	lysosomal membrane|early endosome|centrosome|synaptic vesicle|endosome membrane|membrane|apical plasma membrane|vacuolar proton-transporting V-type ATPase complex|vacuolar proton-transporting V-type ATPase complex|phagocytic vesicle membrane|proton-transporting V-type ATPase, V0 domain|axon terminus|extracellular vesicular exosome|	cellular iron ion homeostasis|activation of signaling protein activity involved in unfolded protein response|brain development|insulin receptor signaling pathway|ATP hydrolysis coupled proton transport|proton transport|endoplasmic reticulum unfolded protein response|transferrin transport|cilium assembly|cellular protein metabolic process|interaction with host|transmembrane transport|phagosome mat…	protein binding|hydrogen-exporting ATPase activity, phosphorylative mechanism|protein complex binding|	20	-1.59197	-4.01899	7.26831e-07	1.11738e-05
MPRIP	ENSG00000133030	23164	myosin phosphatase Rho interacting protein	cytoplasm|actin cytoskeleton|		actin binding|protein binding|	20	-1.06995	-4.01634	3.09808e-07	5.43184e-06
GATAD1	ENSG00000157259	57798	GATA zinc finger domain containing 1	nucleus|	regulation of transcription, DNA-templated|	sequence-specific DNA binding transcription factor activity|zinc ion binding|sequence-specific DNA binding|	20	-1.46629	-4.01154	5.1193e-07	8.32512e-06
EIF3M	ENSG00000149100	10480	eukaryotic translation initiation factor 3 subunit M	eukaryotic translation initiation factor 3 complex|eukaryotic 43S preinitiation complex|eukaryotic 48S preinitiation complex|	formation of translation preinitiation complex|cytoplasmic translational initiation|translational initiation|regulation of translational initiation|	translation initiation factor activity|protein binding|	20	-1.38558	-4.01131	1.66753e-06	2.21856e-05
C14orf80	ENSG00000185347	283643	chromosome 14 open reading frame 80				18	-3.77126	-4.00823	9.91262e-09	2.9723e-07
TCP1	ENSG00000120438	6950	t-complex 1	pericentriolar material|acrosomal vesicle|zona pellucida receptor complex|nuclear heterochromatin|Golgi apparatus|centrosome|cytosol|chaperonin-containing T-complex|microtubule|cell body|extracellular vesicular exosome|	protein folding|tubulin complex assembly|binding of sperm to zona pellucida|cellular protein metabolic process|'de novo' posttranslational protein folding|	protein binding|ATP binding|poly(A) RNA binding|unfolded protein binding|	18	-2.48402	-4.00646	3.93093e-09	1.4247e-07
SLC27A3	ENSG00000143554	11000	solute carrier family 27 member 3	membrane|integral component of membrane|mitochondrial membrane|	fatty acid metabolic process|	nucleotide binding|fatty-acyl-CoA synthase activity|ligase activity|	20	-1.61146	-4.00581	2.31165e-07	4.1815e-06
RBM48	ENSG00000127993	84060	RNA binding motif protein 48	nucleus|		RNA binding|	20	-1.33307	-4.00474	5.29454e-07	8.58214e-06
PYCRL	ENSG00000104524	65263	pyrroline-5-carboxylate reductase-like		oxidation-reduction process|L-proline biosynthetic process|	pyrroline-5-carboxylate reductase activity|identical protein binding|	20	-1.40389	-4.00222	8.01575e-08	1.6957e-06
TFAP2A	ENSG00000137203	7020	transcription factor AP-2 alpha	nucleus|nucleus|cytoplasm|Golgi apparatus|centrosome|intracellular membrane-bounded organelle|	negative regulation of transcription from RNA polymerase II promoter|kidney development|outflow tract morphogenesis|keratinocyte development|optic vesicle morphogenesis|optic cup structural organization|transcription from RNA polymerase II promoter|sensory perception of sound|negative regulation of cell proliferation|embryonic pattern specification|embryonic body morphogenesis|positive regulation…	transcription regulatory region sequence-specific DNA binding|RNA polymerase II core promoter proximal region sequence-specific DNA binding|RNA polymerase II core promoter sequence-specific DNA binding|RNA polymerase II distal enhancer sequence-specific DNA binding|sequence-specific DNA binding RNA polymerase II transcription factor activity|RNA polymerase II core promoter proximal region sequenc…	16	-1.45155	-4.00164	9.53605e-07	1.40129e-05
CIRH1A	ENSG00000141076						18	-2.41972	-4.00113	1.26947e-08	3.61644e-07
XPC	ENSG00000154767	7508	XPC complex subunit, DNA damage recognition and repair factor	nucleus|nucleoplasm|nucleolus|cytoplasm|plasma membrane|extracellular vesicular exosome|XPC complex|	nucleotide-excision repair, DNA damage recognition|nucleotide-excision repair, DNA damage recognition|nucleotide-excision repair, DNA damage removal|DNA repair|nucleotide-excision repair|nucleotide-excision repair|response to UV-B|intra-S DNA damage checkpoint|response to drug|regulation of mitotic cell cycle phase transition|	heteroduplex DNA loop binding|bubble DNA binding|damaged DNA binding|single-stranded DNA binding|protein binding|	20	-1.4478	-4.00107	1.11342e-05	0.00011179
FAM98B	ENSG00000171262	283742	family with sequence similarity 98 member B	tRNA-splicing ligase complex|		poly(A) RNA binding|	18	-1.51571	-3.99903	9.38279e-08	1.9417e-06
CCDC22	ENSG00000101997	28952	coiled-coil domain containing 22	cellular_component|	biological_process|	molecular_function|	20	-1.29337	-3.99878	2.07001e-06	2.66869e-05
RHOA	ENSG00000067560	387	ras homolog family member A	cytosol|cytoskeleton|plasma membrane|cell cortex|lamellipodium|cell junction|midbody|cleavage furrow|apical junction complex|extracellular vesicular exosome|	GTP catabolic process|transforming growth factor beta receptor signaling pathway|small GTPase mediated signal transduction|Rho protein signal transduction|axon guidance|blood coagulation|viral process|substantia nigra development|actin cytoskeleton organization|platelet activation|regulation of cell migration|positive regulation of cytokinesis|regulation of osteoblast proliferation|cleavage furro…	GTPase activity|protein binding|GTP binding|myosin binding|	20	-1.50704	-3.99872	2.81233e-08	6.94217e-07
TRBV6-6	ENSG00000211724	28601	T cell receptor beta variable 6-6				20	-1.15575	-3.99555	2.39905e-06	3.02647e-05
CHMP2A	ENSG00000130724	27243	charged multivesicular body protein 2A	cytosol|membrane|late endosome membrane|extracellular vesicular exosome|	protein transport|viral process|endosomal transport|viral life cycle|establishment of protein localization|regulation of viral process|membrane organization|positive regulation of viral release from host cell|	protein binding|protein domain specific binding|	18	-2.18723	-3.99287	2.84703e-09	1.1214e-07
PRPF38B	ENSG00000134186	55119	pre-mRNA processing factor 38B	spliceosomal complex|	mRNA processing|RNA splicing|	poly(A) RNA binding|	20	-2.927	-3.9927	1.42068e-06	1.93923e-05
RNF121	ENSG00000137522	55298	ring finger protein 121	integral component of membrane|		zinc ion binding|	20	-1.68372	-3.99228	2.81212e-10	1.72794e-08
FOSL2	ENSG00000075426	2355	FOS like 2, AP-1 transcription factor subunit	nucleus|	regulation of transcription from RNA polymerase II promoter|transcription from RNA polymerase II promoter|female pregnancy|cell death|response to mechanical stimulus|response to progesterone|cellular response to hormone stimulus|response to drug|response to morphine|positive regulation of fibroblast proliferation|response to corticosterone|response to cAMP|	RNA polymerase II regulatory region sequence-specific DNA binding|double-stranded DNA binding|sequence-specific DNA binding transcription factor activity|	20	-1.1185	-3.9918	9.98227e-08	2.04039e-06
PDCD2	ENSG00000071994	5134	programmed cell death 2	nucleus|cytoplasm|extracellular vesicular exosome|	apoptotic process|	DNA binding|protein binding|enzyme binding|metal ion binding|	18	-3.5334	-3.98929	3.79151e-12	7.58773e-10
VMP1	ENSG00000062716	81671	vacuole membrane protein 1	pre-autophagosomal structure|autophagic vacuole membrane|endoplasmic reticulum|plasma membrane|integral component of membrane|endoplasmic reticulum-Golgi intermediate compartment membrane|	autophagy|embryo implantation|regulation of autophagy|single organismal cell-cell adhesion|cell junction assembly|	protein binding|	18	-1.67026	-3.98807	9.78786e-08	2.00681e-06
SKP2	ENSG00000145604	6502	S-phase kinase associated protein 2	nucleus|nucleoplasm|nucleolus|cytoplasm|cytosol|aggresome|SCF ubiquitin ligase complex|	G1/S transition of mitotic cell cycle|G2/M transition of mitotic cell cycle|protein polyubiquitination|mitotic cell cycle|cell proliferation|anaphase-promoting complex-dependent proteasomal ubiquitin-dependent protein catabolic process|positive regulation of intracellular estrogen receptor signaling pathway|positive regulation of smooth muscle cell proliferation|regulation of cell cycle|cellular …	ubiquitin-protein transferase activity|protein binding|identical protein binding|	20	-1.88937	-3.98623	5.55074e-09	1.85676e-07
PIP5K1A	ENSG00000143398	8394	phosphatidylinositol-4-phosphate 5-kinase type 1 alpha	nucleus|cytoplasm|cytosol|mRNA cleavage and polyadenylation specificity factor complex|plasma membrane|nuclear speck|nuclear speck|lamellipodium|ruffle membrane|	phospholipid metabolic process|glycerophospholipid metabolic process|phosphatidylinositol biosynthetic process|phagocytosis|signal transduction|phospholipid biosynthetic process|fibroblast migration|cell migration|keratinocyte differentiation|actin cytoskeleton reorganization|activation of Rac GTPase activity|small molecule metabolic process|phosphatidylinositol phosphorylation|phosphatidylinosit…	protein binding|ATP binding|1-phosphatidylinositol-4-phosphate 5-kinase activity|1-phosphatidylinositol-4-phosphate 5-kinase activity|kinase binding|	18	-1.42765	-3.98593	1.8262e-07	3.39564e-06
CSDC2	ENSG00000172346	27254	cold shock domain containing C2	nucleus|cytoplasm|	regulation of transcription, DNA-templated|mRNA processing|	DNA binding|RNA binding|	20	-1.34018	-3.98526	1.22459e-06	1.71494e-05
MISP	ENSG00000099812	126353	mitotic spindle positioning	cytoskeleton|focal adhesion|cell cortex|	mitotic nuclear division|	actin binding|	20	-1.13269	-3.9848	1.75259e-07	3.28632e-06
TRMU	ENSG00000100416	55687	tRNA 5-methylaminomethyl-2-thiouridylate methyltransferase	mitochondrion|	tRNA processing|	tRNA binding|ATP binding|sulfurtransferase activity|	20	-1.2645	-3.98446	4.1992e-06	4.8783e-05
MRPL41	ENSG00000182154	64975	mitochondrial ribosomal protein L41	mitochondrion|mitochondrial large ribosomal subunit|ribonucleoprotein complex|	translation|apoptotic process|cell cycle|	structural constituent of ribosome|protein binding|poly(A) RNA binding|	20	-3.65381	-3.98431	2.2303e-12	5.56264e-10
PDCD2L	ENSG00000126249	84306	programmed cell death 2 like	cytoplasm|membrane|	cell cycle|		20	-1.17783	-3.98339	5.86175e-06	6.53597e-05
NGDN	ENSG00000129460	25983	neuroguidin	chromosome, centromeric region|nucleolus|cytoplasm|filopodium|axon|dendrite|	regulation of translation|	poly(A) RNA binding|	20	-2.62905	-3.98279	1.1419e-10	9.34581e-09
CDKAL1	ENSG00000145996	54901	CDK5 regulatory subunit associated protein 1 like 1	cellular_component|endoplasmic reticulum membrane|rough endoplasmic reticulum|membrane|integral component of membrane|	biological_process|tRNA methylthiolation|maintenance of translational fidelity|	molecular_function|N6-threonylcarbomyladenosine methylthiotransferase activity|metal ion binding|4 iron, 4 sulfur cluster binding|	20	-1.21674	-3.98024	4.15691e-06	4.84828e-05
ZNF687	ENSG00000143373	57592	zinc finger protein 687	nucleus|nucleolus|	transcription, DNA-templated|regulation of transcription, DNA-templated|	DNA binding|metal ion binding|	20	-1.37983	-3.9791	1.16131e-06	1.64013e-05
MED15	ENSG00000099917	51586	mediator complex subunit 15	nucleus|nucleoplasm|cytoplasm|membrane|mediator complex|	regulation of transcription from RNA polymerase II promoter|transcription initiation from RNA polymerase II promoter|gene expression|stem cell maintenance|	RNA polymerase II transcription cofactor activity|protein binding|	20	-1.71654	-3.97883	8.27177e-05	0.000625472
MRPL11	ENSG00000174547	65003	mitochondrial ribosomal protein L11	mitochondrial ribosome|	translation|	structural constituent of ribosome|protein binding|poly(A) RNA binding|	20	-2.21951	-3.97874	1.83477e-11	2.30443e-09
TLN1	ENSG00000137076	7094	talin 1	ruffle|extracellular region|cytoplasm|microtubule organizing center|cytosol|plasma membrane|cell-cell junction|focal adhesion|focal adhesion|focal adhesion|cell surface|actin cytoskeleton|ruffle membrane|extracellular vesicular exosome|	platelet degranulation|cellular component movement|muscle contraction|activation of signaling protein activity involved in unfolded protein response|cytoskeletal anchoring at plasma membrane|cell-cell junction assembly|cell-substrate junction assembly|cell adhesion|axon guidance|blood coagulation|platelet activation|cortical actin cytoskeleton organization|endoplasmic reticulum unfolded protein r…	actin binding|insulin receptor binding|integrin binding|structural constituent of cytoskeleton|protein binding|vinculin binding|LIM domain binding|	20	-1.91326	-3.97692	1.30646e-06	1.81054e-05
SLC25A19	ENSG00000125454	60386	solute carrier family 25 member 19	nucleus|mitochondrial inner membrane|integral component of membrane|	deoxynucleotide transport|transmembrane transport|	deoxynucleotide transmembrane transporter activity|	20	-1.68165	-3.97639	4.00718e-07	6.73597e-06
SMARCA4	ENSG00000127616	6597	SWI/SNF related, matrix associated, actin dependent regulator of chromatin, subfamily a, member 4	nuclear chromatin|heterochromatin|extracellular space|nucleus|nuclear euchromatin|perichromatin fibrils|nucleolus|membrane|SWI/SNF complex|protein complex|npBAF complex|npBAF complex|nBAF complex|	negative regulation of transcription from RNA polymerase II promoter|cell morphogenesis|vasculogenesis|blastocyst growth|blastocyst hatching|liver development|neural retina development|ATP catabolic process|nucleosome disassembly|chromatin remodeling|chromatin remodeling|methylation-dependent chromatin silencing|transcription, DNA-templated|regulation of transcription from RNA polymerase II promo…	RNA polymerase II core promoter proximal region sequence-specific DNA binding|RNA polymerase II distal enhancer sequence-specific DNA binding|RNA polymerase II transcription coactivator activity|p53 binding|transcription coactivator activity|transcription coactivator activity|transcription corepressor activity|helicase activity|protein binding|ATP binding|DNA-dependent ATPase activity|Tat protein…	20	-1.71044	-3.97563	3.787e-08	8.9319e-07
AGAP2	ENSG00000135439	116986	ArfGAP with GTPase domain, ankyrin repeat and PH domain 2	nucleus|nucleus|nucleolus|mitochondrion|membrane|	small GTPase mediated signal transduction|axon guidance|protein transport|regulation of ARF GTPase activity|negative regulation of protein catabolic process|negative regulation of neuron apoptotic process|positive regulation of GTPase activity|	protein binding|GTP binding|ARF GTPase activator activity|zinc ion binding|	20	-1.64439	-3.97489	1.83333e-06	2.41501e-05
BIRC5	ENSG00000089685	332	baculoviral IAP repeat containing 5	nuclear chromosome|chromosome, centromeric region|condensed chromosome kinetochore|nucleus|cytoplasm|centriole|spindle|cytosol|cytosol|microtubule|spindle microtubule|cytoplasmic microtubule|midbody|interphase microtubule organizing center|chromosome passenger complex|	G2/M transition of mitotic cell cycle|mitotic cell cycle|cytokinesis|transcription, DNA-templated|protein phosphorylation|apoptotic process|chromosome segregation|mitotic nuclear division|mitotic nuclear division|positive regulation of cell proliferation|negative regulation of endopeptidase activity|protein complex localization|positive regulation of exit from mitosis|spindle checkpoint|negative …	cysteine-type endopeptidase inhibitor activity|protein binding|microtubule binding|microtubule binding|zinc ion binding|zinc ion binding|Ran GTPase binding|tubulin binding|enzyme binding|identical protein binding|protein homodimerization activity|protein homodimerization activity|cysteine-type endopeptidase inhibitor activity involved in apoptotic process|metal ion binding|protein heterodimerizat…	18	-3.04552	-3.97127	7.69093e-08	1.63218e-06
CHTF8	ENSG00000168802	54921	chromosome transmission fidelity factor 8	nucleus|	DNA replication|cell cycle|	DNA binding|	28	-1.2989	-3.97089	1.16607e-09	5.4535e-08
NUDT8	ENSG00000167799	254552	nudix hydrolase 8	mitochondrion|	metabolic process|	hydrolase activity|metal ion binding|	20	-2.20608	-3.96938	3.78191e-05	0.000320836
YAP1	ENSG00000137693	10413	Yes associated protein 1	nucleus|nucleoplasm|transcription factor complex|cytoplasm|cytosol|	vasculogenesis|embryonic heart tube morphogenesis|transcription initiation from RNA polymerase II promoter|cellular response to DNA damage stimulus|cell proliferation|positive regulation of cell proliferation|gene expression|regulation of keratinocyte proliferation|keratinocyte differentiation|negative regulation of epithelial cell differentiation|notochord development|somatic stem cell maintenan…	RNA polymerase II transcription factor binding transcription factor activity|chromatin binding|transcription coactivator activity|transcription corepressor activity|protein binding|transcription regulatory region DNA binding|proline-rich region binding|	20	-2.36366	-3.96802	1.55219e-09	6.85779e-08
POLR2J3	ENSG00000168255	548644	RNA polymerase II subunit J3	nucleus|	transcription, DNA-templated|	DNA binding|DNA-directed RNA polymerase activity|protein dimerization activity|	18	-1.87062	-3.96703	8.44154e-09	2.6136e-07
YPEL5	ENSG00000119801	51646	yippee like 5				18	-1.71683	-3.96569	4.76676e-09	1.65552e-07
SLC27A5	ENSG00000083807	10998	solute carrier family 27 member 5	endoplasmic reticulum|endoplasmic reticulum membrane|basal plasma membrane|integral component of endoplasmic reticulum membrane|protein complex|	very long-chain fatty acid metabolic process|triglyceride mobilization|bile acid biosynthetic process|bile acid biosynthetic process|bile acid metabolic process|bile acid and bile salt transport|plasma membrane long-chain fatty acid transport|small molecule metabolic process|ketone body biosynthetic process|	ATP binding|fatty acid transporter activity|very long-chain fatty acid-CoA ligase activity|protein complex binding|cholate-CoA ligase activity|	20	-1.15813	-3.96366	1.47386e-06	1.99545e-05
MED18	ENSG00000130772	54797	mediator complex subunit 18	mediator complex|	regulation of transcription from RNA polymerase II promoter|transcription from RNA polymerase II promoter|	RNA polymerase II transcription cofactor activity|protein binding|	20	-1.40339	-3.96166	1.43269e-08	3.99286e-07
SCRN2	ENSG00000141295	90507	secernin 2	extracellular vesicular exosome|	proteolysis|biological_process|	molecular_function|dipeptidase activity|	20	-1.28739	-3.95905	3.07524e-05	0.00026959
TSC1	ENSG00000165699	7248	tuberous sclerosis 1	cytoplasm|cytosol|cytosol|actin filament|cell cortex|membrane|lamellipodium|growth cone|TSC1-TSC2 complex|intracellular membrane-bounded organelle|protein complex|	kidney development|neural tube closure|regulation of cell-matrix adhesion|rRNA export from nucleus|regulation of translation|potassium ion transport|cell cycle arrest|cell-matrix adhesion|negative regulation of cell proliferation|insulin receptor signaling pathway|negative regulation of translation|hippocampus development|cerebral cortex development|cell projection organization|negative regulatio…	protein binding|GTPase regulator activity|GTPase activating protein binding|protein N-terminus binding|chaperone binding|	20	-1.19738	-3.95891	9.07304e-07	1.34114e-05
NELFA	ENSG00000185049	7469	negative elongation factor complex member A	nucleus|nucleoplasm|cytoplasm|NELF complex|	transcription from RNA polymerase II promoter|transcription elongation from RNA polymerase II promoter|multicellular organismal development|gene expression|viral process|negative regulation of transcription elongation from RNA polymerase II promoter|positive regulation of viral transcription|	chromatin binding|protein binding|	20	-2.10036	-3.95751	1.4758e-08	4.08761e-07
AC114546.1	ENSG00000212768						18	-1.20733	-3.95736	2.95341e-07	5.21482e-06
MPI	ENSG00000178802	4351	mannose phosphate isomerase	cytosol|extracellular vesicular exosome|	dolichol-linked oligosaccharide biosynthetic process|GDP-mannose biosynthetic process|GDP-mannose biosynthetic process|protein N-linked glycosylation via asparagine|post-translational protein modification|cellular protein metabolic process|	mannose-6-phosphate isomerase activity|zinc ion binding|	20	-1.10361	-3.95477	3.88623e-08	9.13035e-07
SENP8	ENSG00000166192	123228	SUMO/sentrin peptidase family member, NEDD8 specific		proteolysis|	cysteine-type peptidase activity|	20	-1.32236	-3.95211	4.67068e-07	7.70451e-06
CNOT8	ENSG00000155508	9337	CCR4-NOT transcription complex subunit 8	intracellular|nucleus|cytosol|CCR4-NOT complex|	nuclear-transcribed mRNA catabolic process, deadenylation-dependent decay|nuclear-transcribed mRNA poly(A) tail shortening|transcription, DNA-templated|regulation of transcription, DNA-templated|regulation of translation|positive regulation of cell proliferation|negative regulation of cell proliferation|gene expression|RNA metabolic process|mRNA metabolic process|gene silencing by miRNA|exonucleo…	3'-5'-exoribonuclease activity|sequence-specific DNA binding transcription factor activity|RNA binding|poly(A)-specific ribonuclease activity|protein binding|metal ion binding|	20	-1.30859	-3.95141	0.000105854	0.000767017
FAM83H	ENSG00000180921	286077	family with sequence similarity 83 member H		biomineral tissue development|		20	-1.85399	-3.95038	1.61274e-09	7.06279e-08
MRPL38	ENSG00000204316	64978	mitochondrial ribosomal protein L38	mitochondrion|ribosome|			20	-2.66963	-3.94283	1.67058e-05	0.000158913
EPN3	ENSG00000049283	55040	epsin 3	nucleus|coated pit|extrinsic component of plasma membrane|clathrin-coated vesicle|perinuclear region of cytoplasm|extracellular vesicular exosome|		protein binding|lipid binding|	20	-1.17218	-3.94012	5.67783e-07	9.10002e-06
GSPT1	ENSG00000103342	2935	G1 to S phase transition 1	intracellular|	G1/S transition of mitotic cell cycle|nuclear-transcribed mRNA catabolic process, nonsense-mediated decay|GTP catabolic process|GTP catabolic process|translational termination|protein methylation|	translation release factor activity|GTPase activity|protein binding|GTP binding|poly(A) RNA binding|	18	-2.07959	-3.93842	2.26342e-06	2.87718e-05
GRB2	ENSG00000177885	2885	growth factor receptor bound protein 2	nucleus|cytoplasm|endosome|Golgi apparatus|cytosol|plasma membrane|COP9 signalosome|vesicle membrane|extracellular vesicular exosome|Grb2-EGFR complex|	epidermal growth factor receptor signaling pathway|Ras protein signal transduction|cell-cell signaling|axon guidance|aging|blood coagulation|insulin receptor signaling pathway|insulin receptor signaling pathway|fibroblast growth factor receptor signaling pathway|positive regulation of signal transduction|positive regulation of signal transduction|viral process|platelet activation|positive regulat…	phosphotyrosine binding|SH3/SH2 adaptor activity|epidermal growth factor receptor binding|neurotrophin TRKA receptor binding|protein binding|SH3 domain binding|protein kinase binding|protein phosphatase binding|identical protein binding|insulin receptor substrate binding|poly(A) RNA binding|ephrin receptor binding|	20	-1.10437	-3.93664	3.42097e-07	5.90976e-06
SLC25A10	ENSG00000262660	1468	solute carrier family 25 member 10	nucleus|mitochondrial inner membrane|integral component of membrane|	sulfur amino acid metabolic process|sulfur amino acid catabolic process|carbohydrate metabolic process|glucose metabolic process|gluconeogenesis|ion transport|dicarboxylic acid transport|mitochondrial transport|cellular nitrogen compound metabolic process|small molecule metabolic process|transmembrane transport|sulfide oxidation, using sulfide:quinone oxidoreductase|	dicarboxylic acid transmembrane transporter activity|protein binding|	36	-2.5265	-3.93293	9.89678e-18	1.97639e-13
NPIPA5	ENSG00000183793	100288332	nuclear pore complex interacting protein family member A5				20	-1.62775	-3.93243	0.000147282	0.0010083
RUVBL2	ENSG00000183207	10856	RuvB like AAA ATPase 2	Swr1 complex|intracellular|nucleus|nucleoplasm|nuclear euchromatin|cytoplasm|membrane|nuclear matrix|ribonucleoprotein complex|Ino80 complex|NuA4 histone acetyltransferase complex|extracellular vesicular exosome|MLL1 complex|	ATP catabolic process|DNA repair|DNA recombination|chromatin organization|chromatin remodeling|transcription, DNA-templated|protein folding|DNA duplex unwinding|DNA duplex unwinding|DNA duplex unwinding|cellular response to UV|positive regulation of histone acetylation|regulation of growth|histone H4 acetylation|histone H2A acetylation|positive regulation of transcription from RNA polymerase II p…	RNA polymerase II core promoter sequence-specific DNA binding|RNA polymerase II distal enhancer sequence-specific DNA binding|DNA helicase activity|damaged DNA binding|ATP-dependent DNA helicase activity|protein binding|ATP binding|ATPase activity|chromatin DNA binding|identical protein binding|identical protein binding|ATP-dependent 5'-3' DNA helicase activity|unfolded protein binding|	18	-3.00974	-3.93046	2.06978e-07	3.78512e-06
TMEM199	ENSG00000244045	147007	transmembrane protein 199	integral component of membrane|			20	-2.61974	-3.93027	1.97381e-10	1.34529e-08
TNNC2	ENSG00000101470	7125	troponin C2, fast skeletal type	cytosol|troponin complex|	skeletal muscle contraction|regulation of muscle contraction|muscle filament sliding|	actin binding|calcium ion binding|	20	-1.12456	-3.93025	3.45273e-05	0.000297588
DUSP3	ENSG00000108861	1845	dual specificity phosphatase 3	immunological synapse|nucleus|nucleoplasm|cytosol|extracellular vesicular exosome|	inactivation of MAPK activity|in utero embryonic development|toll-like receptor signaling pathway|MyD88-dependent toll-like receptor signaling pathway|MyD88-independent toll-like receptor signaling pathway|toll-like receptor 2 signaling pathway|toll-like receptor 3 signaling pathway|toll-like receptor 4 signaling pathway|toll-like receptor 5 signaling pathway|toll-like receptor 9 signaling pathwa…	protein tyrosine phosphatase activity|protein tyrosine/serine/threonine phosphatase activity|protein tyrosine/serine/threonine phosphatase activity|MAP kinase phosphatase activity|	20	-1.28101	-3.93013	6.73072e-08	1.45311e-06
CCNA2	ENSG00000145386	890	cyclin A2	female pronucleus|male pronucleus|nucleus|nucleoplasm|cytoplasm|	regulation of cyclin-dependent protein serine/threonine kinase activity|G2/M transition of mitotic cell cycle|mitotic cell cycle|mitotic nuclear division|mitotic G2 DNA damage checkpoint|Ras protein signal transduction|regulation of G2/M transition of mitotic cell cycle|organ regeneration|response to estradiol|response to glucagon|positive regulation of transcription, DNA-templated|positive regul…	protein binding|protein kinase binding|	20	-2.00868	-3.928	0.000580172	0.00320943
NDUFS6	ENSG00000145494	4726	NADH:ubiquinone oxidoreductase subunit S6	mitochondrial inner membrane|mitochondrial respiratory chain complex I|mitochondrial respiratory chain complex I|	mitochondrial electron transport, NADH to ubiquinone|fatty acid metabolic process|muscle contraction|multicellular organismal aging|respiratory electron transport chain|multicellular organism growth|cellular metabolic process|small molecule metabolic process|reproductive system development|mitochondrion morphogenesis|cardiovascular system development|	NADH dehydrogenase (ubiquinone) activity|electron carrier activity|	20	-1.87451	-3.92752	1.69893e-08	4.60348e-07
ZBTB2	ENSG00000181472	57621	zinc finger and BTB domain containing 2	nucleus|	transcription, DNA-templated|regulation of transcription, DNA-templated|	DNA binding|metal ion binding|	20	-1.58203	-3.92674	1.10943e-06	1.57241e-05
SCO2	ENSG00000130489	9997	SCO2, cytochrome c oxidase assembly protein	nucleus|mitochondrion|mitochondrion|mitochondrial inner membrane|myofibril|	eye development|in utero embryonic development|muscle system process|copper ion transport|cellular copper ion homeostasis|respiratory chain complex IV assembly|response to activity|respiratory electron transport chain|oxidation-reduction process|	copper ion binding|	20	-3.46017	-3.92456	1.63724e-10	1.18894e-08
DDX55	ENSG00000111364	57696	DEAD-box helicase 55	membrane|	ATP catabolic process|	ATP binding|ATP-dependent helicase activity|poly(A) RNA binding|	18	-2.45147	-3.92315	1.07532e-08	3.18136e-07
RP11-1167A19.2	ENSG00000255038						18	-1.11969	-3.92295	5.41354e-06	6.10013e-05
IDH3A	ENSG00000166411	3419	isocitrate dehydrogenase 3 (NAD(+)) alpha	nucleus|mitochondrion|mitochondrial matrix|	carbohydrate metabolic process|tricarboxylic acid cycle|cellular metabolic process|small molecule metabolic process|	magnesium ion binding|isocitrate dehydrogenase (NAD+) activity|NAD binding|	20	-1.49646	-3.91946	6.89454e-05	0.000536779
KAT6A	ENSG00000083168	7994	lysine acetyltransferase 6A	nucleosome|nucleus|nucleoplasm|Golgi apparatus|PML body|MOZ/MORF histone acetyltransferase complex|	heart morphogenesis|DNA packaging|chromatin organization|nucleosome assembly|transcription, DNA-templated|protein acetylation|histone acetylation|myeloid cell differentiation|somatic stem cell maintenance|embryonic hemopoiesis|aorta morphogenesis|negative regulation of sequence-specific DNA binding transcription factor activity|histone H3 acetylation|negative regulation of transcription, DNA-temp…	DNA binding|chromatin binding|transcription coactivator activity|histone acetyltransferase activity|protein binding|transcription factor binding|zinc ion binding|acetyltransferase activity|	20	-1.20031	-3.91887	1.12912e-07	2.26391e-06
NDUFB7	ENSG00000099795	4713	NADH:ubiquinone oxidoreductase subunit B7	mitochondrion|mitochondrial inner membrane|mitochondrial respiratory chain complex I|mitochondrial intermembrane space|	mitochondrial electron transport, NADH to ubiquinone|respiratory electron transport chain|cellular metabolic process|small molecule metabolic process|	NADH dehydrogenase (ubiquinone) activity|	20	-2.58466	-3.91831	1.82309e-10	1.27744e-08
AP1G1	ENSG00000166747	164	adaptor related protein complex 1 gamma 1 subunit	Golgi membrane|cytoplasm|lysosomal membrane|Golgi apparatus|cytosol|membrane|AP-type membrane coat adaptor complex|clathrin adaptor complex|clathrin-coated vesicle|cytoplasmic vesicle membrane|clathrin-coated vesicle membrane|trans-Golgi network membrane|intracellular membrane-bounded organelle|perinuclear region of cytoplasm|recycling endosome|	intracellular protein transport|post-Golgi vesicle-mediated transport|viral process|antigen processing and presentation of exogenous peptide antigen via MHC class II|melanosome organization|endosome to melanosome transport|positive regulation of natural killer cell degranulation|positive regulation of natural killer cell mediated cytotoxicity|regulation of defense response to virus by virus|membr…	transporter activity|protein binding|protein transporter activity|Rab GTPase binding|kinesin binding|GTP-dependent protein binding|	20	-1.40232	-3.91827	7.02975e-05	0.000544758
PFDN1	ENSG00000113068	5201	prefoldin subunit 1	prefoldin complex|	regulation of transcription, DNA-templated|protein folding|cell cycle|telencephalon development|cerebellum development|actin cytoskeleton organization|B cell activation|cellular protein metabolic process|'de novo' posttranslational protein folding|	sequence-specific DNA binding transcription factor activity|unfolded protein binding|	20	-1.47469	-3.9154	2.54021e-08	6.44574e-07
ARID1A	ENSG00000117713	8289	AT-rich interaction domain 1A	nuclear chromatin|nucleus|nucleus|SWI/SNF complex|npBAF complex|nBAF complex|	negative regulation of transcription from RNA polymerase II promoter|neural tube closure|cardiac chamber development|optic cup formation involved in camera-type eye development|nucleosome disassembly|chromatin remodeling|transcription, DNA-templated|regulation of transcription from RNA polymerase II promoter|intracellular estrogen receptor signaling pathway|androgen receptor signaling pathway|for…	DNA binding|DNA binding|transcription coactivator activity|protein binding|ligand-dependent nuclear receptor binding|nucleosome binding|	20	-1.14662	-3.91102	8.49807e-06	8.87122e-05
MVD	ENSG00000167508	4597	mevalonate diphosphate decarboxylase	cytosol|cytosol|	dolichol-linked oligosaccharide biosynthetic process|dolichyl diphosphate biosynthetic process|cholesterol biosynthetic process|cholesterol biosynthetic process|cholesterol biosynthetic process|positive regulation of cell proliferation|isoprenoid biosynthetic process|protein N-linked glycosylation via asparagine|post-translational protein modification|cellular protein metabolic process|small mole…	diphosphomevalonate decarboxylase activity|diphosphomevalonate decarboxylase activity|ATP binding|Hsp70 protein binding|protein homodimerization activity|	18	-3.64054	-3.91051	7.2559e-12	1.23268e-09
DDX28	ENSG00000182810	55794	DEAD-box helicase 28	nucleus|mitochondrion|mitochondrial nucleoid|	metabolic process|	helicase activity|ATP binding|poly(A) RNA binding|	20	-2.9449	-3.90917	4.1713e-09	1.48487e-07
ATP8B3	ENSG00000130270	148229	ATPase phospholipid transporting 8B3	acrosomal membrane|endoplasmic reticulum|integral component of membrane|	ATP catabolic process|cation transport|binding of sperm to zona pellucida|phospholipid translocation|	magnesium ion binding|phospholipid-translocating ATPase activity|ATP binding|ATPase activity|cation-transporting ATPase activity|	20	-1.12655	-3.90718	1.18081e-07	2.36279e-06
MRPS21	ENSG00000187145	54460	mitochondrial ribosomal protein S21	mitochondrial small ribosomal subunit|	translation|	structural constituent of ribosome|poly(A) RNA binding|	20	-3.16614	-3.90674	2.96501e-09	1.15422e-07
GFER	ENSG00000127554	2671	growth factor, augmenter of liver regeneration	extracellular region|cytoplasm|mitochondrion|mitochondrial intermembrane space|	protein targeting to mitochondrion|cellular protein metabolic process|oxidation-reduction process|	protein binding|growth factor activity|protein disulfide oxidoreductase activity|thiol oxidase activity|flavin adenine dinucleotide binding|	20	-2.49946	-3.90468	3.1599e-10	1.9007e-08
HLA-DOA	ENSG00000204252	3111	major histocompatibility complex, class II, DO alpha	lysosomal membrane|plasma membrane|endosome membrane|integral component of membrane|MHC class II protein complex|	negative regulation of antigen processing and presentation of peptide antigen via MHC class II|immune response|signal transduction|antigen processing and presentation of exogenous peptide antigen via MHC class II|regulation of T cell differentiation|	MHC class II protein complex binding|MHC class II receptor activity|	20	-1.10789	-3.9038	5.59087e-07	8.98228e-06
DGKD	ENSG00000077044	8527	diacylglycerol kinase delta	cytoplasm|plasma membrane|plasma membrane|cytoplasmic membrane-bounded vesicle|	endocytosis|signal transduction|epidermal growth factor receptor signaling pathway|protein kinase C-activating G-protein coupled receptor signaling pathway|multicellular organismal development|blood coagulation|response to organic substance|protein transport|cell growth|phosphorylation|second-messenger-mediated signaling|platelet activation|diacylglycerol metabolic process|diacylglycerol metaboli…	NAD+ kinase activity|diacylglycerol kinase activity|diacylglycerol kinase activity|protein binding|ATP binding|diacylglycerol binding|protein homodimerization activity|metal ion binding|protein heterodimerization activity|	20	-1.16778	-3.90263	7.05536e-08	1.51338e-06
DDX6	ENSG00000110367	1656	DEAD-box helicase 6	cytoplasmic mRNA processing body|cytoplasm|cytosol|cytoplasmic stress granule|membrane|RISC complex|intracellular membrane-bounded organelle|	nuclear-transcribed mRNA catabolic process, deadenylation-dependent decay|ATP catabolic process|gene expression|RNA metabolic process|mRNA metabolic process|cytoplasmic mRNA processing body assembly|exonucleolytic nuclear-transcribed mRNA catabolic process involved in deadenylation-dependent decay|	RNA helicase activity|helicase activity|protein binding|ATP binding|ATP-dependent helicase activity|poly(A) RNA binding|	20	-2.10808	-3.90179	6.73161e-11	5.94824e-09
TMED10	ENSG00000170348	10972	transmembrane p24 trafficking protein 10	Golgi membrane|Golgi membrane|endoplasmic reticulum|endoplasmic reticulum membrane|endoplasmic reticulum-Golgi intermediate compartment|Golgi apparatus|cis-Golgi network|plasma membrane|integral component of membrane|COPI-coated vesicle|trans-Golgi network transport vesicle|transport vesicle membrane|secretory granule membrane|endoplasmic reticulum-Golgi intermediate compartment membrane|melanoso…	response to acid|kidney development|intracellular protein transport|ER to Golgi vesicle-mediated transport|retrograde vesicle-mediated transport, Golgi to ER|Golgi organization|beta-amyloid formation|cargo loading into vesicle|COPI-coated vesicle budding|response to alkaloid|regulated secretory pathway|vesicle targeting, to, from or within Golgi|COPI coating of Golgi vesicle|COPII vesicle coating…	protein binding|syntaxin binding|protein complex binding|	20	-1.75038	-3.90134	8.53712e-07	1.27705e-05
PPAP2C	ENSG00000141934						20	-1.07654	-3.90043	5.49341e-09	1.84353e-07
NARS2	ENSG00000137513	79731	asparaginyl-tRNA synthetase 2, mitochondrial (putative)	mitochondrion|mitochondrial matrix|	tRNA aminoacylation for protein translation|asparaginyl-tRNA aminoacylation|gene expression|	nucleic acid binding|asparagine-tRNA ligase activity|ATP binding|	20	-3.18986	-3.90039	5.37382e-07	8.67544e-06
TMCO6	ENSG00000113119	55374	transmembrane and coiled-coil domains 6	nucleus|cytoplasm|integral component of membrane|	protein import into nucleus|	protein transporter activity|	20	-1.44897	-3.89874	0.0041222	0.0162785
COQ2	ENSG00000173085	27235	coenzyme Q2, polyprenyltransferase	mitochondrion|mitochondrial inner membrane|integral component of membrane|	glycerol metabolic process|ubiquinone biosynthetic process|ubiquinone biosynthetic process|ubiquinone biosynthetic process|cell death|isoprenoid biosynthetic process|small molecule metabolic process|	4-hydroxybenzoate decaprenyltransferase activity|4-hydroxybenzoate nonaprenyltransferase activity|	20	-2.40813	-3.89858	1.80848e-08	4.8412e-07
APITD1	ENSG00000175279						14	-2.01494	-3.89622	1.31158e-06	1.81512e-05
GATAD2A	ENSG00000167491	54815	GATA zinc finger domain containing 2A	nucleus|NuRD complex|nuclear speck|	blood vessel development|in utero embryonic development|neural fold formation|DNA methylation|transcription, DNA-templated|embryonic body morphogenesis|programmed cell death|anterior neuropore closure|negative regulation of transcription, DNA-templated|	sequence-specific DNA binding transcription factor activity|protein binding|zinc ion binding|protein binding, bridging|sequence-specific DNA binding|	18	-1.22035	-3.89603	3.02388e-05	0.000265787
ATF7	ENSMUSG00000099083	11016	activating transcription factor 7	nucleus|nucleoplasm|cytoplasm|nuclear periphery|	transcription, DNA-templated|regulation of transcription, DNA-templated|viral process|	sequence-specific DNA binding transcription factor activity|protein binding|transcription factor binding|enzyme binding|sequence-specific DNA binding|metal ion binding|mitogen-activated protein kinase binding|	18	-1.42191	-3.89525	8.37962e-07	1.25631e-05
PRMT5	ENSG00000100462	10419	protein arginine methyltransferase 5	nucleus|nucleus|cytoplasm|cytosol|cytosol|methylosome|	negative regulation of transcription from RNA polymerase II promoter|spliceosomal snRNP assembly|spliceosomal snRNP assembly|transcription, DNA-templated|regulation of transcription, DNA-templated|regulation of mitosis|cell proliferation|gene expression|RNA metabolic process|peptidyl-arginine methylation|peptidyl-arginine methylation, to symmetrical-dimethyl arginine|circadian regulation of gene …	core promoter sequence-specific DNA binding|chromatin binding|transcription corepressor activity|protein binding|methyltransferase activity|histone-arginine N-methyltransferase activity|protein-arginine omega-N symmetric methyltransferase activity|ribonucleoprotein complex binding|	18	-2.34492	-3.89479	0.000195514	0.0012833
SPATA2L	ENSG00000158792	124044	spermatogenesis associated 2 like				16	-1.25787	-3.89017	0.000132475	0.000921462
PMPCB	ENSG00000105819	9512	peptidase, mitochondrial processing beta subunit	mitochondrial inner membrane|mitochondrial matrix|	proteolysis|protein targeting to mitochondrion|cellular protein metabolic process|	metalloendopeptidase activity|metal ion binding|	18	-1.2037	-3.88708	5.21365e-06	5.89562e-05
AL645608.1	ENSG00000268179						16	-1.2462	-3.88669	4.55212e-07	7.54406e-06
TOP1MT	ENSG00000184428	116447	topoisomerase (DNA) I, mitochondrial	nucleus|mitochondrion|mitochondrial nucleoid|	ATP catabolic process|DNA replication|DNA topological change|	DNA binding|DNA topoisomerase type I activity|DNA topoisomerase type II (ATP-hydrolyzing) activity|	20	-1.26153	-3.88469	3.21341e-07	5.58987e-06
[truncated: 19,023 more rows]

## Sheet: H23 3D Genome-wide data
Symbol	EnsemblID	GeneID	GeneInfo	Localization	Process	Function	#Element	Med Phenotype (pZ)	Tscore	MWU P-val	MWU Q-val
[truncated: 19,970 more rows]

## Sheet: H23 3Dto2D Genome-wide
Symbol	EnsemblID	GeneID	GeneInfo	Localization	Process	Function	#Element	Med Phenotype (pZ)	Tscore	MWU P-val	MWU Q-val
[truncated: 19,875 more rows]

[truncated: 8 more sheets: H23 2D KRASi Genome-wide data, H23 3D KRASi Genome-wide data, H1975 2D Genome-wide data, H1975 3D Genome-wide data, H1975 3Dto2D Genome-wide, H2009 2D Genome-wide data, H2009 3D Genome-wide data, H2009 3Dto2D Genome-wide]
